# Supplementary material for: Pushing the limits of de novo genome assembly for complex prokaryotic genomes harboring very long, near identical repeats
Source: Nucleic Acids Res. 2018 Aug 23;46(17):8953–65. doi: 10.1093/nar/gky726 (PMC6158609; doi:10.1093/nar/gky726)
Supplement: Supplementary Data [file gky726_supplemental_files.zip › Supplemental_Table_4.xlsx]

## Sheet: Archaea
Organism	Strain name	NCBI assembly name	NCBI GenBank accessions	Number of repeats	Longest repeat [base-pairs]	Assembly complexity class
Methanococcus voltae A3	A3	ASM617v2	CP002057.1	18	64264	3
Halobacterium salinarum R1	DSM 671 = R1	ASM6902v1	AM774415.1,AM774416.1,AM774417.1,AM774418.1,AM774419.1	203	61818	3
Halalkalicoccus jeotgali B3	B3	ASM19689v1	CP002062.1,CP002063.1,CP002064.1,CP002065.1,CP002066.1,CP002067.1,CP002068.1	12	37524	3
Halobacterium salinarum NRC-1	NRC-1; ATCC 700922	ASM680v1	AE004437.1,AF016485.1,AE004438.1	183	37292	3
Halostagnicola larsenii XH-48	XH-48	ASM51762v1	CP007055.1,CP007056.1,CP007057.1,CP007058.1,CP007059.1	14	37097	3
Halorientalis sp. IM1011	IM1011	ASM198961v1	CP019067.1,CP019069.1,CP019068.1	6	19897	3
Natronomonas pharaonis DSM 2160	Gabara	ASM2604v1	CR936257.1,CR936258.1,CR936259.1	24	19560	3
Aciduliprofundum sp. MAR08-339	MAR08-339	ASM32750v1	CP003168.1	6	17549	3
Methanococcus vannielii SB	SB	ASM1716v1	CP000742.1	22	16217	3
Methanoculleus marisnigri JR1	JR1	ASM1582v1	CP000562.1	11	15722	3
Natronomonas moolapensis 8.8.11	8.8.11	ASM59105v1	HF582854.1	59	13396	3
Methanosaeta thermophila PT	PT	ASM1494v1	CP000477.1	28	12901	3
Methanosarcina barkeri str. Wiesmoor	Wiesmoor	ASM96998v1	CP009526.1,CP009525.1	121	10811	3
Methanosarcina siciliae C2J	C2J	ASM97014v1	CP009508.1	276	10661	3
Methanosarcina thermophila TM-1	TM-1	ASM96988v1	CP009501.1	42	10385	3
halophilic archaeon DL31 Archaea.	DL31	ASM22447v1	CP002988.1,CP002989.1,CP002990.1	143	9997	3
Candidatus Nitrososphaera gargensis Ga9.2	NA	ASM30315v1	CP002408.1	28	9919	3
Methanobrevibacter sp. YE315	YE315	ASM154867v1	CP010834.1	26	9901	3
Candidatus Nitrososphaera evergladensis SR1	NA	ASM73028v1	CP007174.1	6	8938	3
Methanosarcina barkeri 3	3	ASM97030v1	CP009517.1	42	8228	3
Methanosarcina horonobensis HB-1 = JCM 15518	HB-1	ASM97028v1	CP009516.1	83	8207	3
Thermococcus kodakarensis KOD1	KOD1	ASM996v1	AP006878.1	2	8192	3
Halorubrum lacusprofundi ATCC 49239	ATCC 49239	ASM2220v1	CP001365.1,CP001366.1,CP001367.1	202	7547	3
Methanohalobium evestigatum Z-7303	Z-7303	ASM19665v1	CP002069.1,CP002070.1	94	6797	1
Sulfolobus solfataricus P2	P2	ASM700v1	AE006641.1	212	6585	2
Methanosarcina sp. MTP4	MTP4	ASM97004v1	CP009505.1	45	6426	1
Candidatus Micrarchaeota archaeon Mia14	Mia14	ASM221416v1	CP019964.1	23	6201	1
Methanospirillum hungatei JF-1	JF-1	ASM1344v1	CP000254.1	97	6195	1
Methanosphaera stadtmanae DSM 3091	DSM 3091	ASM1254v1	CP000102.1	37	6104	1
Haloquadratum walsbyi DSM 16790	DSM 16790 = HBSQ001	ASM918v1	AM180088.1,AM180089.1	33	6098	1
Haloquadratum walsbyi C23	DSM 16854 = C23	ASM23786v1	FR746099.1,FR746100.1,FR746101.1,FR746102.1	53	6082	1
Methanobacterium paludis	SWAN1	ASM21472v1	CP002772.1	17	6068	1
Methanosarcina siciliae T4/M	T4/M	ASM97008v1	CP009506.1	111	6045	2
Methanococcoides methylutens MM1	MM1	ASM97032v1	CP009518.1	9	6044	1
Methanosarcina siciliae HI350	HI350	ASM97012v1	CP009507.1	97	6044	1
Candidatus Nitrocosmicus oleophilus	MY3	ASM80220v2	CP012850.1	85	6025	1
Methanocorpusculum labreanum Z	Z	ASM1576v1	CP000559.1	5	5980	1
Methanosarcina barkeri MS	MS	ASM97002v1	CP009528.1,CP009527.1	149	5979	2
Salinigranum rubrum	GX10	ASM290657v1	CP026309.1,CP026310.1,CP026311.1,CP026312.1,CP026313.1,CP026314.1	14	5968	1
Methanosarcina barkeri 227	227	ASM97006v1	CP009530.1,CP009529.1	82	5966	1
Methanococcoides burtonii DSM 6242	DSM 6242	ASM1372v1	CP000300.1	102	5951	2
halophilic archaeon True-ADL	True-ADL	ASM278821v1	CP024845.1	70	5905	1
Methanosphaerula palustris E1-9c	E1-9c	ASM2196v1	CP001338.1	24	5903	1
Methanobacterium subterraneum	A8p	ASM281369v1	CP017768.1	44	5827	1
Methanobacterium sp. MZ-A1	MZ-A1	ASM281367v1	CP017767.1	49	5821	1
Methanobacterium sp. MO-MB1	MO-MB1	ASM281365v1	CP017766.1	27	5817	1
Natrialbaceae archaeon JW/NM-HA 15	JW/NM-HA 15	ASM215670v1	CP019893.1	36	5792	1
Methanobacterium congolense	NA	MCBB	LT607756.1,LT607757.1	13	5787	1
Halovivax ruber XH-70	XH-70	ASM32852v1	CP003050.1	4	5775	1
Methanohalophilus mahii DSM 5219	DSM 5219	ASM2586v1	CP001994.1	21	5762	1
Halopenitus persicus	CBA1233	ASM235563v1	AP017558.1,AP017559.1	44	5753	1
Candidatus Nitrosocosmicus exaquare	G61	ASM187012v1	CP017922.1	37	5721	1
Methanolobus psychrophilus R15	R15	ASM30672v1	CP003083.1	83	5703	1
Natronobacterium gregoryi SP2	SP2	ASM23071v3	CP003377.1	91	5698	1
Halopiger xanaduensis SH-6	SH-6	ASM21771v1	CP002839.1,CP002840.1,CP002841.1,CP002842.1	3	5662	1
Methanolacinia petrolearia DSM 11571	NA	ASM14787v1	CP002117.1	12	5647	1
Halobiforma lacisalsi AJ5	AJ5	ASM22697v3	CP019285.1,CP019286.1,CP019287.1	70	5628	1
Natronococcus occultus SP4	SP4	ASM32868v1	CP003929.1,CP003930.1,CP003931.1	13	5620	1
Halogeometricum borinquense DSM 11551	PR 3	ASM17299v2	CP001690.1,CP001691.1,CP001692.1,CP001693.1,CP001694.1,CP001695.1	31	5618	1
Methanothermobacter wolfeii	NA	SIV6	LT608329.1	6	5612	1
Methanocella paludicola SANAE	SANAE	ASM1100v1	AP011532.1	28	5602	1
Haloferax mediterranei ATCC 33500	CGMCC 1.2087	ASM30676v2	CP001868.2,CP001869.1,CP001870.1,CP001871.1	11	5589	1
Methanosarcina sp. Kolksee	Kolksee	ASM96994v1	CP009524.1,CP009523.1	64	5557	1
Methanosarcina vacuolata Z-761	Z-761	ASM96990v1	CP009520.1,CP009519.1	87	5557	1
Methanobacterium lacus	AL-21	ASM19158v1	CP002551.1	4	5548	1
Haloferax volcanii DS2	DS2	ASM2568v1	CP001956.1,CP001957.1,CP001954.1,CP001953.1,CP001955.1	233	5547	2
Methanocella arvoryzae MRE50	MRE50	ASM6344v1	AM114193.2	42	5544	1
Methanobacterium sp. MB1	NA	Methanobacterium	HG425166.1	17	5539	1
Natrinema pellirubrum DSM 15624	DSM 15624	ASM23073v3	CP003372.1,CP003373.1,CP003374.1	188	5516	2
Methanobacterium formicicum	BRM9	ASM76226v1	CP006933.1	24	5491	1
Methanobacterium formicicum	NA	DSM1535	LN515531.1	24	5491	1
Methanobrevibacter ruminantium M1	M1	ASM2418v1	CP001719.1	19	5484	1
Haloterrigena turkmenica DSM 5511	DSM 5511	ASM2532v1	CP001860.1,CP001861.1,CP001862.1,CP001863.1,CP001864.1,CP001865.1,CP001866.1	20	5483	1
Methanobacterium formicicum	NA	Mb9	LN734822.1	26	5477	1
Methanosarcina barkeri CM1	CM1	ASM102700v1	CP008746.1	84	5471	1
Haloferax gibbonsii	ARA6	ASM119096v1	CP011947.1,CP011948.1,CP011949.1,CP011950.1,CP011951.1	6	5467	1
Halorubrum trapanicum	CBA1232	ASM235565v1	AP017569.1,AP017570.1,AP017571.1	10	5442	1
Methanosarcina lacustris Z-7289	Z-7289	ASM97026v1	CP009515.1	199	5422	2
Methanocella conradii HZ254	HZ254	ASM25110v1	CP003243.1	24	5415	1
Natrialba magadii ATCC 43099	ATCC 43099	ASM2562v1	CP001932.1,CP001933.1,CP001934.1,CP001935.1	25	5412	1
Natrinema sp. J7-2	J7-2	ASM28169v1	CP003412.1,CP003413.1	30	5373	1
Methanothermobacter sp. CaT2	CaT2	ASM82857v1	AP011952.1,AP011953.1	12	5370	1
Methanothermobacter marburgensis str. Marburg	Marburg	ASM14529v1	CP001710.1,CP001711.1	6	5366	1
Methanothermobacter sp. EMTCatA1	NA	ASM235639v1	AP018336.1	10	5365	1
Methanosalsum zhilinae DSM 4017	DSM 4017	ASM21799v1	CP002101.1	30	5361	1
Methanosaeta concilii GP6	GP6	ASM20441v1	CP002565.1,CP002566.1	170	5358	2
Haloterrigena daqingensis	JX313	ASM197170v1	CP019327.1,CP019328.1,CP019329.1,CP019330.1	7	5355	1
Methanothermobacter thermautotrophicus str. Delta H	Delta H	ASM864v1	AE000666.1	12	5355	1
Methanomethylovorans hollandica DSM 15978	DSM 15978	ASM32866v1	CP003362.1,CP003363.1	43	5340	1
Methanobrevibacter olleyae	YLM1	ASM156324v1	CP014265.1	26	5312	1
Haloarcula marismortui ATCC 43049	ATCC 43049	ASM1108v1	AY596297.1,AY596298.1,AY596290.1,AY596291.1,AY596292.1,AY596293.1,AY596294.1,AY596295.1,AY596296.1	54	5276	1
Methanosarcina sp. WH1	WH1	ASM97000v1	CP009504.1	108	5262	2
Methanosarcina sp. WWM596	WWM596	ASM96996v1	CP009503.1	133	5254	2
Halomicrobium mukohataei DSM 12286	DSM 12286	ASM2396v1	CP001688.1,CP001689.1	35	5252	1
Methanosarcina barkeri str. Fusaro	Fusaro	ASM19589v1	CP000099.1,CP000098.1	123	5239	2
Haloarcula hispanica ATCC 33960	CGMCC 1.2049	ASM22390v1	CP002921.1,CP002922.1,CP002923.1	17	5235	1
Haloarcula hispanica N601	N601	ASM50456v2	CP006884.1,CP006885.2,CP006886.1,CP006887.1	17	5235	1
Methanosarcina mazei LYC	LYC	ASM97022v1	CP009513.1	101	5189	2
Methanosarcina thermophila CHTI-55	CHTI-55	ASM96992v1	CP009502.1	38	5181	1
Methanosarcina mazei C16	C16	ASM97024v1	CP009514.1	130	5178	2
Methanosarcina mazei S-6	S-6	ASM97020v1	CP009512.1	103	5173	2
Methanobrevibacter sp. AbM4	AbM4	ASM40416v1	CP004050.1	20	5167	1
Methanosarcina mazei WWM610	WWM610	ASM97016v1	CP009509.1	115	5165	2
Methanosarcina acetivorans C2A	C2A	ASM734v1	AE010299.1	228	5140	2
Methanosarcina mazei SarPi	SarPi	ASM97018v1	CP009511.1	104	5140	2
Methanosarcina mazei Go1	Go1	ASM706v1	AE008384.1	96	5138	1
Methanosarcina mazei Tuc01	Tuc01	ASM34171v1	CP004144.1	13	5130	1
Palaeococcus pacificus DY20341	DY20341	ASM72542v1	CP006019.1	2	5125	1
Methanothermus fervidus DSM 2088	DSM 2088	ASM16609v1	CP002278.1	16	5102	1
Methanococcus maripaludis	DSM 2067	ASM294532v1	CP026606.1	12	5066	1
Methanococcus maripaludis S2	S2	ASM1158v1	BX950229.1	7	5066	1
Methanococcus maripaludis C5	C5	ASM1612v1	CP000609.1,CP000610.1	13	5064	1
Methanococcus maripaludis C7	C7	ASM1722v1	CP000745.1	15	5063	1
Methanococcus maripaludis C6	C6	ASM1848v1	CP000867.1	11	5058	1
Methanococcus maripaludis X1	X1	ASM22064v1	CP002913.1	12	5047	1
Methanocaldococcus jannaschii DSM 2661	DSM 2661	ASM9166v1	L77117.1,L77118.1,L77119.1	6	4982	1
Methanocaldococcus vulcanius M7	M7	ASM2462v1	CP001787.1,CP001788.1,CP001789.1	18	4964	1
Methanocaldococcus fervens AG86	AG86	ASM2398v1	CP001696.1,CP001697.1	10	4955	1
Methanocaldococcus infernus ME	ME	ASM9230v1	CP002009.1	27	4952	1
Methanothermococcus okinawensis IH1	IH1	ASM17957v2	CP002792.1,CP002793.1	32	4913	1
Haloarcula sp. CBA1115	CBA1115	ASM82783v1	CP010529.1,CP010530.1,CP010531.1,CP010532.1,CP010533.1,CP010534.1	17	4907	1
Methanococcus aeolicus Nankai-3	Nankai-3	ASM1718v1	CP000743.1	10	4903	1
Methanocaldococcus sp. FS406-22	FS406-22	ASM2552v1	CP001901.1,CP001902.1	12	4888	1
Methanotorris igneus Kol 5	Kol 5	ASM21441v1	CP002737.1	55	4850	1
Methanosaeta harundinacea 6Ac	6Ac	ASM23556v1	CP003117.1,CP003118.1	30	4252	1
Archaeoglobus veneficus SNP6	SNP6	ASM19462v1	CP002588.1	34	3658	1
Methanobrevibacter smithii ATCC 35061	ATCC 35061; PS; DSMZ 861	ASM1652v1	CP000678.1	30	3603	1
Methanobrevibacter smithii	KB11	ASM281308v1	CP017803.1	16	3601	1
Methanobrevibacter millerae	SM9	ASM147765v1	CP011266.1	44	3566	1
Haloarcula sp. 'Taiwanensis'	Taiwanensis	ASM284433v1	CP019154.1,CP019155.1,CP019156.1,CP019157.1	6	3440	1
methanogenic archaeon ISO4-H5	ISO4-H5	ASM156091v1	CP014214.1	40	3186	1
Methanoculleus bourgensis	NA	MBBA	LT549891.1	16	3110	1
Sulfolobus islandicus L.S.2.15	L.S.2.15	ASM2238v1	CP001399.1	64	2953	1
Candidatus Methanoplasma termitum	MpT1	ASM80080v1	CP010070.1	24	2873	1
Sulfolobus islandicus Y.G.57.14	Y.G.57.14	ASM2246v1	CP001403.1	139	2719	2
Sulfolobus islandicus Y.N.15.51	Y.N.15.51	ASM2248v1	CP001404.1,CP001405.1	184	2635	2
Sulfolobus islandicus REY15A	REY15A	ASM18955v1	CP002425.1	77	2623	1
Acidianus manzaensis	YN-25	ASM211669v1	CP020477.1	21	2562	1
Sulfolobus tokodaii str. 7	7	ASM1120v1	BA000023.2	56	2513	1
Sulfolobus solfataricus	P1	SSOP1	LT549890.1	221	2473	2
Sulfolobus solfataricus	SULB	ASM96835v1	CP011055.1	197	2465	2
Sulfolobus solfataricus	98/2 SULC	ASM96839v1	CP011056.1	197	2465	2
Sulfolobus solfataricus	SULA	ASM96843v1	CP011057.1	196	2465	2
Sulfolobus solfataricus 98/2	98/2	ASM2474v1	CP001800.1	188	2465	2
Thermococcus barophilus	CH5	ASM143345v1	CP013050.1	8	2428	1
Archaeoglobus fulgidus DSM 8774	DSM 8774	ASM73403v1	CP006577.1	30	2311	1
Thermococcus sp. 2319x1	2319x1	ASM148468v1	CP012200.1	15	2209	1
Ferroplasma acidarmanus fer1	fer1	ASM15226v2	CP004145.1	52	2156	1
Halanaeroarchaeum sulfurireducens	HSR2	ASM101111v1	CP008874.1,CP008875.1	11	2090	1
Candidatus Nitrosotenuis cloacae	SAT1	ASM95590v3	CP011097.2	8	2082	1
Archaeoglobus sulfaticallidus PM70-1	PM70-1	ASM38556v1	CP005290.1	14	2058	1
Methanohalophilus halophilus	Z-7982	ASM188940v1	CP017921.1	10	2056	1
Sulfolobus islandicus HVE10/4	HVE10/4	ASM18957v1	CP002426.1	64	2044	1
Candidatus Nitrosocaldus islandicus	NA	ASM290621v1	CP024014.1	6	2037	1
Sulfolobus islandicus M.14.25	M.14.25	ASM2240v1	CP001400.1	54	2036	1
Candidatus Nanopusillus acidilobi	7A	ASM155201v1	CP010514.1	6	1988	1
Candidatus Methanomethylophilus alvus Mx1201	Mx1201	ASM30025v2	CP004049.1	16	1970	1
Pyrococcus furiosus COM1	COM1	ASM27560v1	CP003685.1	43	1946	1
Pyrococcus furiosus DSM 3638	DSM 3638	ASM730v1	AE009950.1	32	1946	1
Sulfolobus acidocaldarius	Y14 16-22	ASM221548v1	CP020362.1	4	1934	1
Archaeoglobus fulgidus DSM 4304	DSM 4304	ASM866v1	AE000782.1	22	1886	1
Halorhabdus tiamatea SARL4B	type strain: SARL4B	HATI1	HF571520.1,HF571521.1	84	1846	1
Halobacterium hubeiense	JI20-1	Halobacterium_hubeiense_JI20-1	LN831302.1,LN831303.1,LN831304.1,LN831305.1	4	1840	1
Cuniculiplasma divulgatum	PM4 (=JCM 30641; =VKM B-2940)	C.divulgatum_PM4	LT719092.1	4	1839	1
Thermococcus litoralis DSM 5473	DSM 5473	ASM24698v3	CP006670.1	17	1839	1
Thermofilum uzonense	1807-2	ASM99380v1	CP009961.1	7	1767	1
Candidatus Nitrosocaldus cavascurensis	SCU2	Nitrosocaldus_cavascurensis_SCU2_chromosome	LT981265.1	4	1761	1
Sulfolobus islandicus M.16.4	M.16.4	ASM2244v1	CP001402.1	21	1739	1
Vulcanisaeta moutnovskia 768-28	768-28	ASM19031v1	CP002529.1	2	1735	1
Sulfolobus islandicus LAL14/1	LAL14/1	ASM36474v1	CP003928.1	38	1729	1
Methanoculleus sp. MAB1	NA	Methanoculleus_sp_MAB1	LT158599.1	17	1723	1
Methanoculleus bourgensis MS2	MS2T	Mb_MS2	HE964772.2	20	1722	1
Methanoregula formicica SMSP	SMSP	ASM32748v1	CP003167.1	8	1712	1
Archaeoglobus profundus DSM 5631	DSM 5631	ASM2528v1	CP001857.1,CP001858.1	4	1689	1
Thermoproteus tenax Kra 1	Kra 1	ASM25305v1	FN869859.1	6	1663	1
Halobacterium sp. DL1	DL1	ASM23095v3	CP007060.1,CP007061.1	34	1606	1
Candidatus Caldiarchaeum subterraneum	NA	ASM27032v1	BA000048.1	2	1602	1
Thermococcus chitonophagus	NA	Pyrococcus_chitonophagus_genome_sequence	LN999010.1	8	1559	1
Ferroplasma acidiphilum	Y	ASM207835v1	CP015363.1	35	1541	1
Candidatus Korarchaeum cryptofilum OPF8	NA	ASM1960v1	CP000968.1	2	1531	1
Thermococcus celer	Vu 13	ASM221436v1	CP014854.1	8	1473	1
Halodesulfurarchaeum formicicum	HSR6	ASM188695v1	CP016804.1	2	1465	1
Halanaeroarchaeum sulfurireducens	M27-SA2	ASM130565v1	CP011564.1,CP011565.1	8	1404	1
Sulfolobus islandicus M.16.27	M.16.27	ASM2242v1	CP001401.1	60	1398	1
Thermococcus sibiricus MM 739	MM 739	ASM2254v1	CP001463.1	2	1398	1
Thermoplasma volcanium GSS1	GSS1	ASM1118v1	BA000011.4	19	1398	1
Thermofilum adornatus	NA	ASM44601v1	CP006646.1	2	1373	1
Aeropyrum pernix K1	K1	ASM1112v1	BA000002.3	2	1316	1
Thermococcus nautili	30-1	ASM58549v1	CP007264.1	2	1298	1
Pyrobaculum aerophilum str. IM2	IM2	ASM722v1	AE009441.1	22	1295	1
Nitrososphaera viennensis EN76	EN76	ASM69878v1	CP007536.1	14	1286	1
Caldisphaera lagunensis DSM 15908	DSM 15908	ASM31779v1	CP003378.1	10	1270	1
Methanoregula boonei 6A8	6A8	ASM1762v1	CP000780.1	6	1258	1
Sulfolobus sp. A20	A20	ASM171912v1	CP017006.1	13	1256	1
Methanocaldococcus bathoardescens	JH146	ASM73906v1	CP009149.1	14	1241	1
Thermococcus eurythermalis	A501	ASM76965v1	CP008887.1,CP008888.1	4	1231	1
Ferroglobus placidus DSM 10642	DSM 10642	ASM2550v1	CP001899.1	29	1218	1
Pyrobaculum islandicum DSM 4184	DSM 4184	ASM1520v1	CP000504.1	14	1214	1
Halorhabdus utahensis DSM 12940	DSM 12940	ASM2394v1	CP001687.1	2	1194	1
Candidatus Nitrosotalea devanaterra	NA	NDEV.embl.gz	LN890280.1	8	1174	1
Pyrococcus abyssi GE5	Orsay	ASM19593v2	AL096836.1,U49503.1	2	1154	1
Candidatus Methanomassiliicoccus intestinalis Issoire-Mx1	Issoire-Mx1	ASM40422v1	CP005934.1	20	1134	1
Pyrobaculum oguniense TE7	TE7	ASM24754v1	CP003316.1,CP003317.1	6	1123	1
Geoglobus acetivorans	SBH6	ASM78925v1	CP009552.1	16	1110	1
Geoglobus ahangari	234	ASM100604v1	CP011267.1	4	1110	1
Caldivirga maquilingensis IC-167	IC-167	ASM1830v1	CP000852.1	16	1101	1
Pyrobaculum ferrireducens	1860	ASM23480v1	CP003098.1	6	1063	1
Thermococcus paralvinellae	ES1	ASM51744v1	CP006965.1	4	1051	1
Thermofilum pendens Hrk 5	Hrk 5	ASM1522v1	CP000505.1,CP000506.1	2	1018	1
Aciduliprofundum boonei T469	T469	ASM2566v1	CP001941.1	16	1002	1
Candidatus Nitrosopumilus sediminis	AR2	ASM29939v1	CP003843.1	4	960	1
Pyrococcus yayanosii CH1	CH1	ASM21599v1	CP002779.1	4	939	1
Sulfolobus acidocaldarius SUSAZ	SUSAZ	ASM50830v1	CP006977.1	6	878	1
Pyrobaculum neutrophilum V24Sta	V24Sta	ASM1980v1	CP001014.1	4	818	1
Pyrobaculum sp. WP30	WP30	ASM118927v1	CP012158.1	4	816	1
Thermococcus sp. 5-4	5-4	ASM219718v1	CP021848.1	2	801	1
Metallosphaera cuprina Ar-4	Ar-4	ASM20492v1	CP002656.1	4	780	1
Pyrobaculum arsenaticum DSM 13514	DSM 13514	ASM1638v1	CP000660.1	4	759	1
Thermoplasma acidophilum DSM 1728	DSM1728	ASM19591v1	AL139299.1	4	754	1
Pyrococcus sp. ST04	ST04	ASM26373v1	CP003534.1	5	738	1
Halodesulfurarchaeum formicicum	HTSR1	ASM176731v1	CP016070.1	2	719	1
Nitrosopumilus maritimus SCM1	SCM1	ASM1846v1	CP000866.1	2	713	1
Candidatus Nitrosopumilus piranensis	D3C	ASM87577v1	CP010868.1	2	693	1
Pyrococcus sp. NA2	NA2	ASM21147v1	CP002670.1	2	671	1
Candidatus Nitrosotenuis sp. AQ6f	AQ6F	ASM278705v1	CP024808.1	4	608	1
Pyrococcus horikoshii OT3	OT3	ASM1110v1	BA000001.2	4	567	1
Acidilobus saccharovorans 345-15	345-15	ASM14491v1	CP001742.1	2	559	1
Candidatus Nitrosopumilus adriaticus	NF5	ASM95617v1	CP011070.1	2	539	1
Thermoproteus uzoniensis 768-20	768-20	ASM19337v1	CP002590.1	2	537	1
Sulfolobus acidocaldarius	Y14 13-1	ASM221552v1	CP020363.1	2	527	1
Sulfolobus acidocaldarius	DG1	ASM221556v1	CP020364.1	2	527	1
Sulfolobus acidocaldarius	Y14 18-5	ASM221540v1	CP020360.1	2	527	1
Sulfolobus acidocaldarius	Y14 20-20	ASM221544v1	CP020361.1	2	527	1
Sulfolobus acidocaldarius DSM 639	DSM 639	ASM1228v1	CP000077.1	2	527	1
Sulfolobus acidocaldarius N8	N8	ASM34031v1	CP002817.1	2	527	1
Sulfolobus acidocaldarius Ron12/I	Ron12/I	ASM33877v1	CP002818.1	2	527	1
Thermococcus thioreducens	OGL-20P	ASM221454v1	CP015105.1	2	527	1
Vulcanisaeta distributa DSM 14429	DSM 14429	ASM14838v1	CP002100.1	2	516	1
archaeon GW2011_AR10 Archaea.	NA	ASM83027v1	CP010424.1	2	508	1
Ignicoccus hospitalis KIN4/I	KIN4/I	ASM1794v1	CP000816.1	2	507	1
Acidianus hospitalis W1	W1	ASM21321v1	CP002535.1	2	505	1
Candidatus Nitrosomarinus catalina	SPOT01	ASM215696v1	CP021324.1	2	500	1
Aeropyrum camini SY1 = JCM 12091	SY1	ASM59103v1	AP012489.1	0	0	1
archaeon GW2011_AR20 Archaea.	NA	ASM83031v1	CP010426.1	0	0	1
Candidatus Nitrosopelagicus brevis	CN25	ASM81218v1	CP007026.1	0	0	1
Candidatus Nitrosopumilus koreensis AR1	AR1	ASM29936v1	CP003842.1	0	0	1
Cuniculiplasma divulgatum	S5(T) (=JCM 30642; =VKM B-2941)	ASM90008351v1	LT671858.1	0	0	1
Desulfurococcus amylolyticus 1221n	1221n	ASM2090v1	CP001140.1	0	0	1
Desulfurococcus amylolyticus DSM 16532	DSM 16532	ASM23101v3	CP003321.1	0	0	1
Desulfurococcus mucosus DSM 2162	DSM 2162	ASM18636v1	CP002363.1	0	0	1
Fervidicoccus fontis Kam940	Kam940	ASM25842v1	CP003423.1	0	0	1
Hyperthermus butylicus DSM 5456	DSM 5456	ASM1514v1	CP000493.1	0	0	1
Ignicoccus islandicus DSM 13165	DSM 13165	ASM148168v1	CP006867.1	0	0	1
Ignisphaera aggregans DSM 17230	DSM 17230	ASM14598v1	CP002098.1	0	0	1
Metallosphaera sedula	ARS120-2	ASM126671v1	CP012175.1	0	0	1
Metallosphaera sedula	ARS120-1	ASM126669v1	CP012174.1	0	0	1
Metallosphaera sedula	SARC-M1	ASM126673v1	CP012176.1	0	0	1
Metallosphaera sedula	ARS50-1	ASM126665v1	CP012172.1	0	0	1
Metallosphaera sedula	ARS50-2	ASM126667v1	CP012173.1	0	0	1
Metallosphaera sedula DSM 5348	DSM 5348	ASM1660v1	CP000682.1	0	0	1
Methanopyrus kandleri AV19	AV19	ASM718v1	AE009439.1	0	0	1
Nanoarchaeum equitans Kin4-M	NA	ASM808v1	AE017199.1	0	0	1
Nanohaloarchaea archaeon SG9	NA	ASM176142v1	CP012986.1	0	0	1
Picrophilus torridus DSM 9790	DSM 9790	ASM826v1	AE017261.1	0	0	1
Pyrobaculum calidifontis JCM 11548	JCM 11548	ASM1580v1	CP000561.1	0	0	1
Pyrococcus kukulkanii	NCB100	ASM157777v1	CP010835.1	0	0	1
Pyrodictium delaneyi	Su06	ASM141261v1	CP013011.1	0	0	1
Pyrolobus fumarii 1A	1A	ASM22339v1	CP002838.1	0	0	1
Salinarchaeum sp. Harcht-Bsk1	Harcht-Bsk1	ASM40364v1	CP005962.1	0	0	1
Staphylothermus hellenicus DSM 12710	DSM 12710	ASM9246v1	CP002051.1	0	0	1
Staphylothermus marinus F1	F1	ASM1594v1	CP000575.1	0	0	1
Thermococcus barophilus MP	MP	ASM15110v2	CP002372.1,CP002373.1	0	0	1
Thermococcus barossii	SHCK-94	ASM221446v1	CP015101.1	0	0	1
Thermococcus chitonophagus	GC74	ASM221460v1	CP015193.1	0	0	1
Thermococcus cleftensis	CL1	ASM26552v1	CP003651.1	0	0	1
Thermococcus gammatolerans EJ3	EJ3; DSM 15229	ASM2236v1	CP001398.1	0	0	1
Thermococcus gorgonarius	W-12	ASM221438v1	CP014855.1	0	0	1
Thermococcus guaymasensis DSM 11113	DSM 11113	ASM81610v1	CP007140.1	0	0	1
Thermococcus onnurineus NA1	NA1	ASM1836v1	CP000855.1	0	0	1
Thermococcus pacificus	P-4	ASM221448v1	CP015102.1	0	0	1
Thermococcus peptonophilus	OG-1	ASM159243v1	CP014750.1,CP014751.1	0	0	1
Thermococcus piezophilus	CDGS	ASM164708v1	CP015520.1	0	0	1
Thermococcus profundus	DT 5432	ASM221458v1	CP014862.1,CP014863.1	0	0	1
Thermococcus radiotolerans	EJ2	ASM221456v1	CP015106.1	0	0	1
Thermococcus siculi	RG-20	ASM221450v1	CP015103.1	0	0	1
Thermococcus sp. 4557	4557	ASM22118v1	CP002920.1	0	0	1
Thermococcus sp. AM4	AM4	ASM15120v2	CP002952.1	0	0	1
Thermococcus sp. EXT12c	EXT12c	chr_EXT12c	LT900021.1	0	0	1
Thermococcus sp. P6	P6	ASM221452v1	CP015104.1	0	0	1
Thermofilum carboxyditrophus 1505	1505	ASM81324v1	CP007493.1	0	0	1
Thermogladius calderae 1633	1633	ASM26449v1	CP003531.1	0	0	1
Thermoplasmatales archaeon BRNA1	BRNA1	ASM35030v1	CP002916.1	0	0	1
Thermosphaera aggregans DSM 11486	DSM 11486	ASM9218v1	CP001939.1	0	0	1

## Sheet: Bacteria
Organism	Strain name	NCBI assembly name	NCBI GenBank accessions	Number of repeats	Longest repeat (in base-pairs)	Assembly complexity class
Calothrix sp. NIES-4101	NIES-4101	ASM236837v1	AP018280.1,AP018274.1,AP018275.1,AP018276.1,AP018277.1,AP018278.1,AP018279.1	543	2974674	3
Streptomyces collinus Tu 365	Tu 365	ASM44487v1	CP006259.1,CP006260.1,CP006261.1	9	631365	3
Terriglobus roseus DSM 18391	DSM 18391	ASM26542v1	CP003379.1	10	460521	3
Streptomyces pristinaespiralis	HCCB 10218	ASM127807v1	CP011340.1	23	416411	3
Escherichia coli	C11	ASM190035v1	CP010133.1	68	391982	3
Bacillus thuringiensis	XL6	ASM77407v2	CP013000.1,CP013001.1	46	385980	3
Rhodococcus pyridinivorans SB3094	SB3094	ASM51130v1	CP006996.1,CP006997.1,CP006998.1	50	365758	3
Streptomyces sp. 4F	4F	ASM148470v1	CP013142.1	44	329540	3
Escherichia coli	S40	ASM190094v1	CP010235.1	52	285626	3
Sinorhizobium meliloti	B399	ASM230237v1	CP019488.1,CP019487.1,CP019486.1	177	282809	3
Bordetella pertussis	J448	ASM183145v1	CP017405.1	299	259027	3
Streptomyces lavendulae subsp. lavendulae	CCM 3239	ASM280384v1	CP024985.1,CP024986.1	69	237734	3
Streptomyces pactum	ACT12	ASM200522v1	CP019724.1	78	234247	3
Escherichia coli O157	644-PT8	ASM165029v1	CP015831.1	186	211340	3
Serratia fonticola	GS2	ASM151445v1	CP013913.1,CP013914.1,CP013915.1	88	209483	3
Streptomyces ambofaciens	DSM 40697	ASM163286v1	CP012949.1	47	206936	3
Burkholderia mallei	Turkey9	ASM234618v1	CP009741.1,CP009742.1	339	205394	3
Streptomyces ambofaciens ATCC 23877	ATCC 23877	ASM126788v1	CP012382.1,CP012383.1	57	202695	3
Streptomyces sp. TN58	TN58	ASM194184v1	CP018870.1	47	190445	3
Escherichia coli KO11FL	KO11FL	ASM25802v1	CP002970.1,CP002971.1	101	188580	3
Xanthomonas oryzae pv. oryzae PXO99A	PXO99A	ASM1958v2	CP000967.2	600	186048	3
Bacillus siamensis	SCSIO 05746	ASM285053v1	CP025001.1,CP025002.1	35	169780	3
Streptomyces noursei ATCC 11455	ATCC 11455	ASM170427v1	CP011533.1	247	163365	3
Escherichia coli	D1	ASM190059v1	CP010134.1,CP010135.1,CP010136.1	117	161462	3
Burkholderia thailandensis 34	34	ASM95960v1	CP010017.1,CP010018.1,CP010016.1	426	160505	3
Escherichia coli	D10	ASM190073v1	CP010157.1,CP010158.1,CP010159.1	117	157526	3
Streptomyces sp. 769	769	ASM81602v1	CP003987.1,CP003988.1	78	155968	3
Campylobacter coli	ZV1224	ASM186553v1	CP017875.1,CP017877.1,CP017876.1	4	152313	3
Coxiella-like endosymbiont	CRt	ASM107771v1	CP011126.1	8	150764	3
Acinetobacter calcoaceticus	CA16	ASM205551v1	CP020000.1,CP020001.1	14	145277	3
Methylobacillus flagellatus KT	KT	ASM1370v1	CP000284.1	6	143034	3
Streptomyces alfalfae	ACCC40021	ASM197502v1	CP015588.1	27	141714	3
Streptomyces griseus subsp. griseus NBRC 13350	NBRC 13350	ASM1060v1	AP009493.1	26	132421	3
Burkholderia mallei	Turkey4	ASM234608v1	CP009731.1,CP009732.1	340	131473	3
Streptomyces albulus ZPM	ZPM	ASM96351v1	CP006871.1	265	131448	3
Bordetella pertussis	J447	ASM183143v1	CP017404.1	301	130049	3
Kitasatospora setae KM-6054	KM-6054	ASM26998v1	AP010968.1	74	124210	3
Bacillus thuringiensis serovar morrisoni	BGSC 4AA1	ASM94078v1	CP010577.1,CP010578.1,CP010583.1,CP010582.1,CP010581.1,CP010580.1,CP010579.1	127	121229	3
Pseudomonas putida	DLL-E4	ASM69156v1	CP007620.1	127	118617	3
Shewanella baltica OS155	OS155	ASM1584v1	CP000563.1,CP000564.1,CP000565.1,CP000566.1,CP000567.1	264	115423	3
Escherichia coli str. K-12 substr. DH10B	K-12	ASM1942v1	CP000948.1	90	114469	3
Pseudomonas sp. MS586	MS586	ASM159422v2	CP014205.2	27	110079	3
Salmonella enterica subsp. enterica serovar Newport	0211-109	ASM127829v1	CP012598.1	38	104000	3
Burkholderia mallei	Turkey8	ASM234616v1	CP009739.1,CP009740.1	339	103580	3
Pseudomonas knackmussii B13	B13	PKB13	HG322950.1	74	102855	3
Burkholderia mallei	Turkey10	ASM234600v1	CP010348.1,CP010349.1	341	101358	3
Bordetella pertussis	B199	ASM289276v1	CP022361.1	292	101171	3
Rhodococcus opacus	1CP	ASM168560v1	CP009111.1,CP009112.1,CP009113.1	238	100624	3
Lactococcus lactis subsp. lactis	F44	ASM280418v1	CP024954.1	7	100132	3
Tenericutes bacterium MO-XQ	MO-XQ	ASM283818v1	CP017948.1,CP017949.1	57	99669	3
Brucella suis	ZW046	ASM75508v1	CP009096.1,CP009097.1	18	99476	3
Escherichia coli K-12	C3026	ASM155967v1	CP014272.1,CP014273.1	131	96953	3
Burkholderia mallei	Turkey6	ASM234612v1	CP009735.1,CP009736.1	338	95177	3
Brucella suis	ZW043	ASM75510v1	CP009094.1,CP009095.1	18	94139	3
Escherichia coli	MRSN352231	ASM188653v1	CP018103.1,CP018108.1,CP018107.1,CP018105.1,CP018106.1,CP018104.1	241	88710	3
Sphingobium sp. C1	C1	ASM228828v1	CP022745.1,CP022746.1,CP022747.1,CP022748.1,CP022749.1,CP022750.1,CP022751.1	201	88381	3
Escherichia coli O157:H7 str. EDL933	EDL933	ASM73296v1	CP008957.1,CP008958.1	188	87699	3
Xylella fastidiosa	Hib4	ASM145631v1	CP009885.1,CP009886.1	81	82747	3
Pandoraea apista	TF80G25	ASM101078v1	CP011279.1	18	82635	3
Burkholderia mallei	Turkey5	ASM234610v1	CP009733.1,CP009734.1	335	80420	3
Bacillus thuringiensis YBT-1518	YBT-1518	ASM49752v2	CP005935.1,CP002486.1,CP005936.1,CP005937.1,CP005938.1,CP005939.1,CP005940.1	862	77151	3
Francisella tularensis subsp. tularensis TIGB03	TIGB03	ASM24841v1	CP003048.1	65	76869	3
Streptomyces coelicolor A3(2)	A3(2)	ASM20383v1	AL645882.2,AL589148.1,AL645771.1	79	75122	3
Salmonella enterica subsp. enterica serovar Anatum	GT-38	ASM144709v1	CP013226.1,CP013224.1,CP013225.1	32	74181	3
Escherichia coli	BH100L	ASM288771v1	CP025716.1	125	72721	3
Escherichia coli	BH100N	ASM290030v1	CP025703.1	93	72169	3
Bartonella henselae	BM1374165	PRJEB5998_assembly_1	HG969191.1	57	71019	3
Wolbachia sp. wRi	wRi	ASM2228v1	CP001391.1	159	70991	3
Burkholderia mallei	Turkey3	ASM234606v1	CP009729.1,CP009730.1	341	70245	3
Enterococcus faecium	Efaecium_ER04526.3A	ASM284874v1	CP023808.1,CP023809.1,CP023810.1,CP023811.1,CP023812.1	334	69084	3
Celeribacter indicus	P73	ASM81956v1	CP004393.1,CP004394.1,CP004395.1,CP004396.1,CP004397.1,CP004398.1	113	66527	3
Burkholderia mallei	Turkey7	ASM234614v1	CP009737.1,CP009738.1	339	66511	3
Acidovorax sp. RAC01	RAC01	ASM171472v1	CP016447.1	58	66352	3
Bacillus thuringiensis serovar galleriae	HD-29	ASM80366v1	CP010089.1,CP010097.1,CP010092.1,CP010091.1,CP010090.1,CP010095.1,CP010094.1,CP010098.1,CP010093.1,CP010099.1,CP010096.1	307	66101	3
Bacillus subtilis subsp. spizizenii TU-B-10	TU-B-10	ASM22746v1	CP002905.1	23	65512	3
Campylobacter coli	OR12	ASM148384v1	CP013733.1,CP013736.1,CP013735.1,CP013734.1	71	64729	3
Campylobacter coli	aerotolerant OR12	ASM202418v1	CP019977.1	66	64729	3
Acinetobacter baumannii TCDC-AB0715	TCDC-AB0715	ASM18973v2	CP002522.2,CP002523.1,CP002524.1	22	64349	3
Bacteroides fragilis	BOB25	ASM96578v1	CP011073.1	29	63294	3
Parvibaculum lavamentivorans DS-1	DS-1	ASM1756v1	CP000774.1	7	61262	3
Azospirillum sp. B510	B510	ASM1072v1	AP010946.1,AP010947.1,AP010948.1,AP010949.1,AP010950.1,AP010951.1,AP010952.1	941	60283	3
Candidatus Riesia sp. GBBU	GBBU	ASM207403v1	CP012849.1,CP012848.1	4	59799	3
Prevotella intermedia	OMA14	ASM235519v1	AP014597.1,AP014598.1	76	59712	3
Salmonella enterica subsp. enterica serovar Anatum	GT-01	ASM144711v1	CP013222.1,CP013221.1,CP013223.1	39	59591	3
Actinoalloteichus sp. GBA129-24	GBA129-24	ASM194164v1	CP016077.1,CP016078.1	23	57720	3
Bordetella pertussis	J042	ASM289274v1	CP019869.1	295	57575	3
Bacillus coagulans DSM 1 = ATCC 7050	ATCC 7050	ASM83290v1	CP009709.1	207	57417	3
Corynebacterium jeikeium	FDAARGOS_328	ASM220918v1	CP022054.1	49	57090	3
Burkholderia cenocepacia J2315	J2315	ASM948v1	AM747720.1,AM747721.1,AM747722.1,AM747723.1	233	57058	3
Mycobacterium smegmatis	INHR2	ASM76770v1	CP009496.1	82	55494	3
Mycobacterium smegmatis	INHR1	ASM76766v1	CP009495.1	82	55494	3
Mycobacterium smegmatis str. MC2 155	MC2 155	ASM1500v1	CP000480.1	82	55494	3
Mycobacterium smegmatis str. MC2 155	MC2 155	ASM28329v1	CP001663.1	82	55494	3
Mycobacterium smegmatis str. MC2 155	MC2 155	ASM76760v1	CP009494.1	82	55494	3
Clostridium botulinum CDC_1436	CDC_1436	ASM81793v1	CP006908.1,CP006909.1	46	55117	3
Pandoraea apista	TF81F4	ASM82696v3	CP010518.3	18	55093	3
gamma proteobacterium HdN1	NA	ASM19851v1	FP929140.1	57	54977	3
Mycobacterium bovis BCG str. Korea 1168P	Korea 1168P	ASM33871v2	CP003900.2	53	54756	3
Mycobacterium bovis	ATCC BAA-935	ASM75824v1	CP009449.1	53	54723	3
Escherichia coli	MS8345	ASM284613v1	CP025401.1,CP025402.1,CP025403.1	209	53117	3
Clostridium tyrobutyricum	KCTC 5387	ASM164265v1	CP014170.1,CP014171.1	46	52685	3
Ralstonia mannitolilytica	SN82F48	ASM95413v2	CP010799.2,CP010800.1,CP010801.1	96	52636	3
Gemmatirosa kalamazoonesis	KBS708	ASM52298v1	CP007128.1,CP007129.1,CP007127.1,CP007130.1	31	52567	3
Escherichia coli	CREC-629	ASM278754v1	CP024815.1,CP024816.1,CP024817.1,CP024818.1	194	52449	3
Lactobacillus brevis	TMW 1.2113	ASM211732v1	CP019750.1,CP019751.1,CP019752.1,CP019753.1,CP019754.1	101	51659	3
Thermodesulfovibrio yellowstonii DSM 11347	DSM 11347	ASM2098v1	CP001147.1	13	51353	3
Burkholderia contaminans	MS14	ASM102914v1	CP009743.1,CP009744.1,CP009745.1	97	51224	3
Pseudomonas aeruginosa	PB353	ASM281286v1	CP025051.1,CP025052.1	30	51221	3
Escherichia coli	BH100	ASM276351v2	CP024650.1,CP024651.1,CP024652.2	146	50772	3
Rhodococcus sp. 2G	2G	ASM188635v1	CP018063.1,CP018064.1	121	50502	3
Escherichia coli	D5	ASM190067v1	CP010145.1,CP010146.1,CP010147.1	100	49696	3
Campylobacter jejuni	FJ3124	ASM186539v1	CP017862.1	9	48819	3
Leptospira borgpetersenii serovar Ballum	56604	ASM144446v1	CP012029.1,CP012030.1,CP012031.1,CP012032.1	127	48666	3
Klebsiella oxytoca	KONIH2	ASM290641v1	CP026285.1,CP026281.1,CP026278.1,CP026284.1,CP026279.1,CP026282.1,CP026283.1,CP026280.1	475	48636	3
Bradyrhizobium sp.	NA	BF49.v1	LN901633.1	113	48502	3
Escherichia coli B	C3029	ASM155963v1	CP014269.1	100	48487	3
Rhodococcus sp. YL-1	YL-1	ASM194202v1	CP017299.1,CP017300.1,CP017301.1,CP017302.1,CP017303.1,CP017304.1	183	47818	3
Corynebacterium diphtheriae HC04	HC04	ASM25519v1	CP003215.1	27	47797	3
Streptomyces sp. DUT11	DUT11	ASM284852v1	CP025511.1	48	47785	3
Leptospira interrogans serovar Linhai str. 56609	56609	ASM94103v1	CP006723.1,CP006724.1,CP006725.1,CP006726.1,CP006727.1	163	47688	3
Enterobacter cloacae ECNIH2	ECNIH2	ASM72450v1	CP008823.1,CP008824.1,CP008825.1,CP008826.1	212	47676	3
Streptococcus agalactiae NEM316	NEM316	ASM19605v1	AL732656.1	22	47079	3
Escherichia coli JJ1886	JJ1886	ASM49375v1	CP006784.1,CP006785.1,CP006786.1,CP006787.1,CP006788.1,CP006789.1	83	46919	3
Francisella tularensis subsp. novicida	DPG 3A-IS	ASM83496v1	CP010103.1,CP010104.1	204	46748	3
Xanthomonas oryzae pv. oryzae	XF89b	ASM202300v1	CP011532.1	616	46123	3
Corynebacterium atypicum	R2070	ASM73294v1	CP008944.1,CP008945.1	7	45600	3
Citrobacter freundii	B38	ASM170245v1	CP016762.1,CP016763.1,CP016764.1,CP016765.1	101	45482	3
Pseudogulbenkiania sp. NH8B	NH8B	ASM28353v1	AP012224.1	38	45370	3
Porphyromonas gingivalis ATCC 33277	ATCC 33277	ASM289257v1	CP025930.1	112	45103	3
Porphyromonas gingivalis 381	381	ASM131426v1	CP012889.1	111	45082	3
Syntrophobacter fumaroxidans MPOB	MPOB	ASM1496v1	CP000478.1	38	44767	3
Corynebacterium ureicelerivorans	IMMIB RIV-2301	ASM74731v1	CP009215.1,CP009216.1	47	44640	3
Pseudomonas aeruginosa PA1R	PA1R	ASM49664v1	CP004055.1	28	43998	3
Streptococcus intermedius	TYG1620	ASM235605v1	AP014880.1	26	43994	3
Mycoplasma pullorum	B359_6	ASM190024v1	CP017813.1	22	43511	3
Bacillus velezensis	YJ11-1-4	ASM98834v1	CP011347.1	30	43098	3
Eubacterium rectale ATCC 33656	ATCC 33656	ASM2060v1	CP001107.1	60	42883	3
Herbivorax saccincola	GGR1	ASM284439v1	CP025197.1	232	42829	3
Xylella fastidiosa	Pr8x	ASM145629v1	CP009826.1,CP009827.1	53	42566	3
Pseudomonas aeruginosa	PA11803	ASM179287v1	CP015003.1	53	42317	3
Nitrospira moscoviensis	NSP M-1	ASM127377v1	CP011801.1	11	42261	3
Staphylococcus aureus	MS4	ASM145621v1	CP009828.1	41	42201	3
Escherichia coli	95NR1	ASM215684v1	CP021339.1,CP021340.1,CP021341.1	299	42155	3
Pseudoalteromonas aliena	EH1	ASM199922v1	CP019628.1	76	41833	3
Klebsiella pneumoniae	AUSMDU00008119	ASM281238v1	CP025008.1,CP025009.1,CP025010.1	131	41778	3
Escherichia coli	D4	ASM190065v1	CP010143.1,CP010144.1	80	41751	3
Mycobacterium bovis	BCG-1 (Russia)	ASM148390v1	CP013741.1	61	41409	3
Mycobacterium bovis BCG	Russia 368	ASM127455v1	CP009243.1	61	41409	3
Mycobacterium bovis BCG str. Tokyo 172	Tokyo 172	ASM1068v1	AP010918.1	59	41409	3
Mycobacterium bovis BCG str. Tokyo 172	Tokyo 172	ASM158038v1	CP014566.1	59	41409	3
Streptomyces venezuelae	ATCC 15439	ASM144362v1	CP013129.1	32	41038	3
Mycobacterium bovis BCG	3281	ASM104325v1	CP008744.1	61	41018	3
Candidatus Phytoplasma mali	AT	ASM2620v1	CU469464.1	12	40946	3
Lactobacillus plantarum	PC520	ASM257683v1	CP023772.1,CP023773.1,CP023774.1	65	40937	3
Kibdelosporangium phytohabitans	KLBMP1111	ASM130258v1	CP012752.1	62	40756	3
Bacillus anthracis	2002013094	ASM83296v1	CP009902.1,CP009901.1,CP009900.1	30	40742	3
Mesotoga prima MesG1.Ag.4.2	MesG1.Ag.4.2	ASM14771v3	CP003532.1,CP003533.1	64	40738	3
Geobacillus thermoleovorans CCB_US3_UF5	CCB_US3_UF5	ASM23660v1	CP003125.1	143	40706	3
Yersinia enterocolitica	YE6	ASM170859v1	CP016937.1,CP016938.1	158	40520	3
Paenibacillus crassostreae	LPB0068	ASM185794v1	CP017770.1,CP017771.1,CP017772.1,CP017773.1	37	40382	3
Streptococcus anginosus C1051	C1051	ASM46346v1	CP003860.1	20	40372	3
Enterococcus faecium Aus0004	Aus0004	ASM25094v1	CP003351.1,CP003352.1,CP003353.1,CP003354.1	101	40310	3
Meiothermus silvanus DSM 9946	DSM 9946	ASM9212v1	CP002042.1,CP002043.1,CP002044.1	388	40274	3
Arthrobacter sp. LS16	LS16	ASM128111v1	CP012171.1	23	40184	3
Lactobacillus gasseri ATCC 33323 = JCM 1131	ATCC 33323	ASM1442v1	CP000413.1	18	40133	3
Rhodobacter sphaeroides ATCC 17025	ATCC 17025	ASM1640v1	CP000661.1,CP000662.1,CP000663.1,CP000664.1,CP000665.1,CP000666.1	240	40047	3
Brevibacillus brevis NBRC 100599	NBRC 100599 (= 47)	ASM1016v1	AP008955.1	53	39725	3
Streptomyces chartreusis NRRL 3882	NA	NRRL3882	LT962942.1	44	39354	3
Streptomyces chartreusis NRRL 3882	NA	NRRL3882	LT963352.1	44	39354	3
Jonesia denitrificans	FDAARGOS_301	ASM220914v1	CP022038.1	12	39214	3
Lactobacillus plantarum	ATCC 8014	ASM274965v1	CP024413.1,CP024415.1,CP024414.1,CP024417.1,CP024416.1	35	38958	3
Escherichia coli	AR_0055	ASM220217v1	CP021935.1,CP021936.1,CP021937.1,CP021938.1	96	38850	3
Vitreoscilla filiformis	ATCC 15551	ASM222265v1	CP022423.1,CP022424.1,CP022425.1	31	38687	3
Pasteurella multocida subsp. multocida HB01	HB01	ASM166309v1	CP006976.1	31	38615	3
Pandoraea norimbergensis	DSM 11628	ASM146554v3	CP013480.3	18	38487	3
Streptococcus suis	NSUI060	ASM157268v1	CP012911.1,CP012912.1,CP012913.1	106	38455	3
Enterobacteriaceae bacterium ENNIH1	ENNIH1	ASM290306v1	CP026193.1,CP026196.1,CP026195.1,CP026194.1	156	38394	3
Staphylococcus aureus subsp. aureus ST398	type strain:ST398	ASM958v1	AM990992.1,AM990993.1,AM990994.1,AM990995.1	45	38216	3
Pseudomonas aeruginosa	PA_D5	ASM172202v1	CP012579.1	43	38173	3
Pseudomonas aeruginosa	PA_D25	ASM172184v1	CP012584.1	44	38172	3
Pseudomonas aeruginosa	PA_D22	ASM172182v1	CP012583.1	43	38171	3
Pseudomonas aeruginosa	PA_D16	ASM172180v1	CP012581.1	43	38171	3
Pseudomonas koreensis	D26	ASM160596v1	CP014947.1	50	38167	3
Salmonella enterica subsp. enterica serovar Albany str. ATCC 51960	ATCC 51960	ASM48751v2	CP019177.1	30	38060	3
Novosphingobium sp. PP1Y	PP1Y	ASM25325v1	FR856862.1,FR856860.1,FR856861.1,FR856859.1	40	38051	3
Pediococcus acidilactici	BCC1	ASM192232v1	CP018763.1,CP018764.1,CP018765.1	30	38028	3
Desulfobacula toluolica Tol2	Tol2	ASM30710v1	FO203503.1	135	38007	3
Amycolatopsis methanolica 239	239	ASM73908v1	CP009110.1	31	37830	3
Erysipelothrix rhusiopathiae	GXBY-1	ASM160215v1	CP014861.1	27	37699	3
Lactobacillus delbrueckii subsp. bulgaricus ATCC BAA-365	ATCC BAA-365	ASM1440v1	CP000412.1	60	37663	3
Pseudomonas aeruginosa	DN1	ASM172200v2	CP017099.1,CP018048.1	53	37573	3
Lachnoclostridium sp. YL32	YL32	ASM168866v2	CP015399.2	391	37533	3
Pseudomonas aeruginosa	NCGM257	ASM154795v1	AP014651.1	72	37397	3
Escherichia coli	FORC_028	ASM172112v1	CP012693.1	221	37383	3
Streptococcus salivarius	FDAARGOS_259	ASM207383v1	CP020451.1	19	37235	3
Dyella jiangningensis	SBZ 3-12	ASM63280v1	CP007444.1	15	37230	3
Klebsiella pneumoniae	CAV1417	ASM190253v1	CP018352.1,CP018351.1,CP018350.1,CP018348.1,CP018349.1	203	37174	3
Enterococcus faecium	NA	ASM202424v1	CP019970.1,CP019971.1,CP019972.1,CP019973.1,CP019974.1,CP019975.1,CP019976.1	366	36831	3
Vibrio vulnificus	93U204	ASM74666v1	CP009261.1,CP009262.1,CP009263.1	162	36804	3
Anaerococcus mediterraneensis	Marseille-P2765	PRJEB15655	LT635772.1	43	36728	3
Corynebacterium diphtheriae PW8	PW8	ASM25527v1	CP003216.1	41	36562	3
Bartonella tribocorum CIP 105476	type strain:506 = CIP 105476	ASM19643v1	AM260525.1,AM260524.1	136	36254	3
Xylella fastidiosa	J1a12	ASM145623v1	CP009823.1,CP009824.1,CP009825.1	72	36245	3
Alkaliphilus metalliredigens QYMF	QYMF	ASM1698v1	CP000724.1	107	36183	3
Bartonella tribocorum	BM1374166	PRJEB5999_assembly_1	HG969192.1,HG969193.1	127	36151	3
Eubacterium limosum KIST612	KIST612	ASM15224v2	CP002273.2	21	35900	3
Corynebacterium falsenii DSM 44353	BL 8171	ASM52565v1	CP007156.1,CP007157.1	19	35820	3
Rhodanobacter denitrificans	2APBS1	ASM23069v3	CP003470.1	25	35712	3
Microbacterium sp. No. 7	No. 7	ASM131422v1	CP012697.1,CP012698.1,CP012699.1	103	35707	3
Klebsiella oxytoca	CAV1374	ASM102219v1	CP011636.1,CP011627.1,CP011633.1,CP011628.1,CP011625.1,CP011634.1,CP011629.1,CP011630.1,CP011631.1,CP011626.1,CP011632.1,CP011635.1	468	35650	3
Ruminococcus albus 7 = DSM 20455	7	ASM17963v2	CP002403.1,CP002404.1,CP002405.1,CP002406.1,CP002407.1	227	35566	3
Geobacillus thermocatenulatus	KCTC 3921	ASM224366v1	CP018058.1	127	35317	3
Methylibium petroleiphilum PM1	PM1	ASM1572v1	CP000555.1,CP000556.1	55	35317	3
Corynebacterium mustelae	DSM 45274	ASM102098v1	CP011542.1,CP011543.1,CP011544.1	25	35280	3
Capnocytophaga sputigena	KC1668	ASM230239v1	CP022385.1	28	35218	3
Salinispora arenicola CNS-205	CNS-205	ASM1826v1	CP000850.1	60	35171	3
Ralstonia pickettii 12J	12J	ASM2020v1	CP001068.1,CP001069.1,CP001070.1	40	35034	3
Shewanella putrefaciens 200	200	ASM16921v2	CP002457.1	108	34928	3
Lactobacillus farciminis KCTC 3681 = DSM 20184	DSM 20184	ASM270674v1	CP017702.1	29	34847	3
Campylobacter coli RM4661	RM4661	ASM58377v1	CP007181.1,CP007182.1	12	34814	3
Xylella fastidiosa	3124	ASM145619v1	CP009829.1	55	34697	3
Klebsiella pneumoniae HK787	HK787	ASM81320v1	CP006738.1	38	34604	3
Bartonella sp. Raccoon60	Raccoon60	ASM202258v1	CP019786.1	25	34332	3
Lactobacillus plantarum	C410L1	ASM187412v1	CP017954.1,CP017955.1,CP017956.1,CP017957.1,CP017958.1,CP017959.1,CP017960.1	132	34273	3
Klebsiella quasivariicola	KPN1705	ASM226925v1	CP022823.1,CP022824.1,CP022825.1,CP022826.1	147	34107	3
Escherichia coli	AR_0017	ASM279658v1	CP024886.1,CP024887.1	85	34038	3
Pasteurella multocida	USDA-ARS-USMARC-60385	ASM285946v1	CP015569.1	46	34014	3
Xylella fastidiosa subsp. sandyi Ann-1	Ann-1	ASM69880v1	CP006696.1,CP006697.1	105	33985	3
Francisella tularensis subsp. tularensis	NR-21734	ASM172960v1	CP017153.1	71	33915	3
Francisella tularensis subsp. tularensis	NR-21736	ASM172956v1	CP017154.1	71	33915	3
Francisella tularensis subsp. tularensis	NR-21737	ASM172958v1	CP017155.1	71	33915	3
Francisella tularensis subsp. tularensis FSC198	FSC 198	ASM932v1	AM286280.1	72	33915	3
Francisella tularensis subsp. tularensis MA00-2987	MA00-2987	ASM126747v1	CP012372.1	74	33915	3
Francisella tularensis subsp. tularensis SCHU S4	SHU-S4	ASM83353v1	CP010290.1	69	33915	3
Francisella tularensis subsp. tularensis SCHU S4	SCHU S4	ASM898v1	AJ749949.2	71	33915	3
Francisella tularensis subsp. tularensis TI0902	TI0902	ASM24843v1	CP003049.1	70	33915	3
Lactobacillus fermentum	MTCC 25067	ASM235613v1	AP017973.1,AP017974.1	157	33883	3
Vibrio cholerae O395	O395	ASM1624v1	CP000626.1,CP000627.1	93	33861	3
Vibrio cholerae O395	O395	ASM2162v1	CP001235.1,CP001236.1	97	33861	3
Francisella tularensis subsp. tularensis NE061598	NE061598	ASM2330v1	CP001633.1	73	33708	3
Francisella tularensis subsp. tularensis	WY96	ASM126211v1	CP012037.1	71	33677	3
Francisella tularensis subsp. tularensis WY96-3418	WY96-3418	ASM1610v1	CP000608.1	72	33675	3
Syntrophobotulus glycolicus DSM 8271	DSM 8271	ASM19063v1	CP002547.1	31	33622	3
Mannheimia haemolytica	187	ASM228559v1	CP023046.1	76	33507	3
Sphingobium sp. TKS	TKS	ASM156326v1	CP005083.1,CP005084.1,CP005085.1,CP005086.1,CP005087.1,CP005088.1,CP005090.1,CP005091.1,CP005092.1,CP005093.1,CP005089.1	361	33495	3
Opitutaceae bacterium TAV5	TAV5	ASM24293v3	CP007053.1,CP007054.1	34	33467	3
Prevotella dentalis DSM 3688	DSM 3688	ASM24233v3	CP003368.1,CP003369.1,CP003370.1,CP003371.1	63	33441	3
Francisella tularensis subsp. mediasiatica FSC147	FSC147; GIEM 543	ASM1892v1	CP000915.1	74	33439	3
Acinetobacter baumannii	A1	ASM83005v1	CP010781.1,CP010782.1	28	33262	3
Macrococcus canis	KM45013	ASM211980v1	CP021059.1	23	33185	3
Clostridium kluyveri DSM 555	DSM 555	ASM1650v1	CP000673.1,CP000674.1	66	33099	3
Pasteurella multocida subsp. multocida	CIRMBP-0884	ASM205922v1	CP020345.1,CP020346.1	37	33081	3
Salmonella enterica subsp. enterica serovar Inverness str. ATCC 10720	ATCC 10720	ASM48715v2	CP019181.1,CP019182.1	42	33041	3
Pasteurella multocida	Pm-3	ASM172188v1	CP014618.1	37	32982	3
Paenibacillus polymyxa	HY96-2	ASM289388v1	CP025957.1	33	32974	3
Pasteurella multocida	USDA-ARS-USMARC-60675	ASM285942v1	CP015567.1	34	32747	3
Pseudomonas aeruginosa	PA7790	ASM187026v1	CP014999.1,CP015000.1	51	32594	3
Clostridioides difficile 630	630	ASM93205v2	CP010905.2	46	32496	3
Clostridioides difficile	630Derm	CD630DERM	LN614756.1	44	32495	3
Clostridioides difficile	630 delta erm	ASM208006v1	CP016318.1,CP016319.1	44	32495	3
Clostridioides difficile 630	630	ASM920v2	AM180355.1,AM180356.2	45	32495	3
Staphylococcus lugdunensis HKU09-01	HKU09-01	ASM2508v1	CP001837.1	13	32455	3
Enterobacter cloacae	AR_0053	ASM219239v1	CP021776.1,CP021777.1,CP021778.1,CP021779.1	58	32408	3
Enterobacter hormaechei subsp. oharae	34978	ASM80740v4	CP012165.1,CP010366.2,CP010363.1,CP012166.1,CP010364.1,CP010367.1,CP010365.1	43	32408	3
Enterobacter cloacae	AR_0002	ASM192236v1	CP018814.1,CP018815.1	43	32405	3
Enterobacter cloacae	AR_0136	ASM220477v1	CP021902.1,CP021900.1,CP021901.1	55	32405	3
Staphylococcus equorum	C2014	ASM168223v1	CP013714.1,CP013715.1,CP013716.1,CP013717.1,CP013718.1,CP013719.1	86	32231	3
Neisseria meningitidis MC58	MC58	ASM880v1	AE002098.2	102	32194	3
Neisseria meningitidis	FDAARGOS_210	ASM207359v1	CP020421.1	102	32193	3
Dinoroseobacter shibae DFL 12 = DSM 16493	DFL 12	ASM1814v1	CP000830.1,CP000831.1,CP000832.1,CP000833.1,CP000834.1,CP000835.1	59	32012	3
Lactococcus lactis subsp. lactis NCDO 2118	NCDO 2118	ASM47825v2	CP009054.1,CP009055.1	23	31872	3
Paraburkholderia sp. SOS3	SOS3	ASM192234v1	CP018811.1,CP018812.1,CP018813.1	66	31862	3
Corynebacterium glutamicum	HA	ASM284742v1	CP025534.1	40	31747	3
Ralstonia solanacearum GMI1000	GMI1000	ASM912v1	AL646052.1,AL646053.1	167	31717	3
Brucella sp. 09RB8471	09RB8471	ASM197162v1	CP019346.1,CP019347.1	48	31646	3
Paracoccus denitrificans PD1222	PD1222	ASM20389v1	CP000489.1,CP000491.1,CP000490.1	99	31597	3
Lactobacillus delbrueckii subsp. jakobsenii ZN7a-9 = DSM 26046	DSM 26046	ASM188892v1	CP018218.1	53	31315	3
Streptococcus agalactiae	NA	SA111	LT545678.1	97	31244	3
Pseudomonas aeruginosa	Carb01 63	ASM98182v1	CP011317.1	110	31243	3
Burkholderia vietnamiensis G4	G4	ASM1620v1	CP000614.1,CP000615.1,CP000616.1,CP000617.1,CP000618.1,CP000619.1,CP000620.1,CP000621.1	676	31205	3
Streptomyces autolyticus	CGMCC0516	ASM198397v1	CP019458.1,CP019459.1,CP019460.1,CP019461.1,CP019462.1,CP019463.1,CP019464.1,CP019465.1	91	31201	3
Dehalococcoides mccartyi 195	195	ASM1190v1	CP000027.1	10	31027	3
Pasteurella multocida subsp. septica	CIRMBP-0873	ASM206817v1	CP020347.1,CP020348.1,CP020349.1	50	30934	3
Flammeovirga sp. MY04	MY04	ASM168219v1	CP003560.1,CP003561.1,CP003562.1	67	30915	3
Leptospira borgpetersenii serovar Hardjo-bovis str. L550	L550	ASM1394v1	CP000348.1,CP000349.1	299	30779	3
Paracoccus sp. BM15	BM15	ASM284730v1	CP025408.1,CP025409.1,CP025410.1,CP025411.1	29	30593	3
Lysinibacillus sphaericus C3-41	C3-41	ASM1796v1	CP000817.1,CP000818.1	49	30580	3
Lactobacillus helveticus H10	H10	ASM18951v1	CP002429.1,CP002430.1	145	30536	3
Bacillus thuringiensis	Bc601	ASM161866v1	CP015150.1,CP015151.1,CP015152.1,CP015153.1,CP015154.1,CP015155.1,CP015156.1	357	30426	3
Staphylococcus aureus	BA01611	ASM129832v2	CP019945.1	52	30401	3
Photorhabdus asymbiotica	NA	ASM19647v1	FM162591.1,FM162592.1	124	30389	3
Campylobacter jejuni	HF5-4A-4	ASM195123v1	CP007188.1	27	30321	3
Vibrio alginolyticus	K08M4	ASM211952v1	CP017916.1,CP017917.1	108	30320	3
Escherichia coli K-12	DHB4	ASM155965v1	CP014270.1,CP014271.1	130	30244	3
Acinetobacter baumannii	XH858	ASM157814v1	CP014528.1	63	30170	3
Enterobacter cloacae P101	P101	ASM51237v1	CP006580.1	49	30150	3
Streptomyces formicae	KY5	ASM255654v1	CP022685.1	35	30148	3
Acinetobacter baumannii	XDR-BJ83	ASM190237v1	CP018421.1,CP018422.1	57	30109	3
Bifidobacterium pseudocatenulatum DSM 20438 = JCM 1200 = LMG 10505	JCM 1200	ASM102521v1	AP012330.1	10	30046	3
Escherichia coli	350	ASM189026v1	CP018243.1,CP018244.1	187	30005	3
Acinetobacter sp. LoGeW2-3	LoGeW2-3	ASM268856v1	CP024011.1,CP024012.1	35	29843	3
Brachyspira murdochii DSM 12563	DSM 12563	ASM9284v1	CP001959.1	21	29711	3
Escherichia coli O157	180-PT54	ASM165027v1	CP015832.1,CP015833.1	203	29682	3
Escherichia coli	ZH193	ASM156667v1	CP014497.1,CP014498.1	117	29608	3
Bacteroides vulgatus ATCC 8482	ATCC 8482	ASM1282v1	CP000139.1	87	29481	3
Alteromonas australica	DE170	ASM93452v1	CP010912.1	18	29440	3
Francisella tularensis subsp. holarctica LVS	LVS	ASM83333v1	CP009694.1	109	29391	3
Francisella tularensis subsp. holarctica	FTT_1	ASM83323v1	CP009693.1	104	29388	3
Francisella tularensis subsp. holarctica F92	F92	ASM31338v1	CP003932.1	108	29388	3
Francisella tularensis subsp. holarctica FSC200	FSC200	ASM16877v2	CP003862.1	107	29388	3
Francisella tularensis subsp. holarctica FTNF002-00	FTNF002-00	ASM1778v1	CP000803.1	109	29388	3
Francisella tularensis subsp. holarctica LVS	LVS	ASM924v1	AM233362.1	109	29388	3
Francisella tularensis subsp. holarctica OSU18	OSU18	ASM1460v1	CP000437.1	113	29388	3
Francisella tularensis subsp. holarctica OSU18	OSU18	ASM1140v1	BK006741.1	113	29388	3
Francisella tularensis subsp. holarctica	VT68	ASM83349v1	CP010288.1	108	29387	3
Francisella tularensis subsp. holarctica	425	ASM83351v1	CP010289.1	108	29386	3
Francisella tularensis subsp. holarctica PHIT-FT049	PHIT-FT049	ASM52457v1	CP007148.1	100	29386	3
Francisella tularensis	12T0050_FLI	ASM288606v1	CP025778.1	112	29377	3
Pasteurella multocida	Razi_Pm0001	ASM187444v1	CP017961.1	28	29345	3
Dehalogenimonas formicexedens	NSZ-14	ASM195317v1	CP018258.1	10	29334	3
Piscirickettsia salmonis	PM15972A1	ASM75643v3	CP012413.1,CP012414.1,CP012415.1,CP012416.1,CP012417.1	1066	29290	3
Pantoea ananatis	YJ76	ASM222458v1	CP022427.1,CP022429.1,CP022431.1,CP022428.1,CP022430.1	50	29247	3
Aliivibrio salmonicida LFI1238	LFI1238	ASM19649v1	FM178379.1,FM178380.1,FM178382.1,FM178384.1,FM178383.1,FM178381.1	680	28991	3
Escherichia coli O157:H7 str. EC4115	EC4115	ASM2112v1	CP001164.1,CP001165.1,CP001163.1	228	28901	3
Rhodobacter sp. LPB0142	LPB0142	ASM185666v1	CP017781.1,CP017782.1,CP017783.1,CP017784.1	123	28890	3
Citrobacter koseri ATCC BAA-895	ATCC BAA-895	ASM1804v1	CP000822.1,CP000824.1,CP000823.1	26	28828	3
Citrobacter koseri	NA	ASM193188v1	CP017665.1	29	28824	3
Alteromonas macleodii ATCC 27126	ATCC 27126	ASM17263v2	CP003841.1	21	28756	3
Escherichia coli	FAM21845	ASM207719v1	CP017220.1,CP017221.1,CP017222.1,CP017223.1,CP017224.1,CP017225.1	251	28535	3
Streptomyces lividans TK24	TK24	ASM73910v1	CP009124.1	38	28525	3
Escherichia coli	C5	ASM190053v1	CP010122.1,CP010123.1,CP010124.1	181	28509	3
Acinetobacter equi	114	ASM130719v1	CP012808.1	39	28469	3
Salmonella enterica subsp. enterica serovar Newport str. Levine 15	Levine 15	ASM27190v2	CP015924.1	38	28417	3
Francisella tularensis subsp. tularensis WY-00W4114	WY-00W4114	ASM101113v1	CP009753.1	70	28353	3
Streptomyces sp. CNQ-509	CNQ-509	ASM101103v1	CP011492.1	63	28341	3
Pseudomonas syringae pv. actinidiae ICMP 9853	ICMP 9853	ASM34433v2	CP018202.1,CP018203.1,CP018204.1	587	28270	3
Lactobacillus plantarum	K259	ASM286877v1	CP025590.1,CP025591.1	35	28146	3
Bacillus thuringiensis serovar alesti	BGSC 4C1	ASM164096v1	CP015176.1,CP015177.1,CP015178.1,CP015179.1,CP015180.1,CP015182.1,CP015181.1	43	28067	3
Pseudomonas aeruginosa	NA	RW109	LT969519.1,LT969521.1,LT969520.1	173	28057	3
Burkholderia sp. MSMB0266	MSMB0266	ASM152444v2	CP013417.1,CP013418.1,CP013419.1	193	28034	3
Streptomyces hygroscopicus subsp. jinggangensis 5008	5008	ASM24535v1	CP003275.1,CP003276.1,CP003277.1	126	28031	3
Streptomyces hygroscopicus subsp. jinggangensis TL01	NA	ASM34084v1	CP003720.1,CP003721.1,CP003722.1	88	28030	3
Aeromonas hydrophila NJ-35	NJ-35	ASM101964v1	CP006870.1	31	27989	3
Pseudomonas aeruginosa	PB350	ASM281290v1	CP025055.1	65	27972	3
Pseudomonas aeruginosa	PB367	ASM281292v1	CP025056.1	65	27972	3
Streptomyces pactum	KLBMP 5084	ASM176737v1	CP016795.1	31	27937	3
Streptococcus equinus	FDAARGOS_251	ASM207351v1	CP020438.1,CP020439.1	35	27915	3
Sphingopyxis macrogoltabida	203N	ASM161099v1	CP013344.1,CP013345.1,CP013346.1	237	27845	3
Escherichia coli	CREC-532	ASM278665v1	CP024830.1,CP024831.1,CP024832.1,CP024833.1	200	27794	3
Vibrio alginolyticus	K08M3	ASM214908v1	CP017913.1,CP017914.1,CP017915.1	77	27767	3
Pseudomonas aeruginosa	RIVM-EMC2982	ASM208560v1	CP016955.1	84	27760	3
Vibrio alginolyticus	K06K5	ASM211956v1	CP017907.1,CP017908.1,CP017910.1,CP017909.1	82	27754	3
Bacillus thuringiensis serovar finitimus YBT-020	YBT-020	ASM19051v1	CP002508.1,CP002509.1,CP002510.1	98	27741	3
Geobacillus thermoleovorans	KCTC 3570	ASM161095v1	CP014335.1,CP014336.1	91	27729	3
Francisella tularensis subsp. tularensis	NIH B-38	ASM83347v1	CP010115.1	68	27695	3
Campylobacter fetus subsp. venerealis 97/608	97/608	ASM75951v1	CP008810.1,CP008811.1,CP008812.1	68	27686	3
Hyphomicrobium denitrificans ATCC 51888	ATCC 51888	ASM14314v1	CP002083.1	13	27686	3
Mycoplasma agalactiae	5632	ASM8986v1	FP671138.1	43	27510	3
Pseudomonas aeruginosa	NCGM 1984	ASM82925v1	AP014646.1	73	27490	3
Pseudomonas aeruginosa	NCGM 1900	ASM82927v1	AP014622.1	73	27490	3
Pseudomonas aeruginosa	E6130952	ASM208575v1	CP020603.1,CP020602.1	88	27489	3
Paraburkholderia xenovorans LB400	LB400	ASM1364v1	CP000270.1,CP000271.1,CP000272.1	170	27478	3
Vibrio anguillarum	VIB12	ASM231033v1	CP023310.1,CP023311.1,CP023312.1	1028	27466	3
Leifsonia xyli subsp. cynodontis DSM 46306	DSM 46306	ASM47077v1	CP006734.1	132	27457	3
Salmonella enterica subsp. enterica	08-00436	ASM223827v1	CP020492.1,CP020493.1,CP020494.1	92	27431	3
Bacillus simplex NBRC 15720 = DSM 1321	DSM 1321	ASM224364v1	CP017704.1	56	27428	3
Jeongeupia sp. USM3	USM3	ASM180818v1	CP017668.1	42	27251	3
Staphylococcus aureus	UTSW MRSA 55	ASM158051v1	CP013231.1,CP013227.1,CP013228.1,CP013229.1,CP013230.1	76	27192	3
Desulfovibrio alaskensis G20	G20	ASM1266v1	CP000112.1	52	27188	3
Nitrosomonas communis	Nm2	ASM100793v1	CP011451.1	220	27182	3
Escherichia coli O103:H2 str. 12009	12009	ASM1074v1	AP010958.1,AP010959.1	190	27180	3
Delftia acidovorans	NA	ASM196924v1	CP019171.1	40	27085	3
Delftia acidovorans SPH-1	SPH-1	ASM1866v1	CP000884.1	66	27085	3
Enterobacteriaceae bacterium ENNIH3	ENNIH3	ASM290308v1	CP026197.1,CP026198.1	99	26980	3
Mycoplasma mycoides subsp. capri LC str. 95010	95010	ASM25307v1	FQ377874.1,FQ790215.1	33	26963	3
Pseudomonas aeruginosa	Pa1207	ASM220864v1	CP022001.1	74	26950	3
Staphylococcus aureus	RIVM3897	ASM146575v1	CP013621.1	38	26911	3
Pseudomonas aeruginosa PA7	PA7	ASM1720v1	CP000744.1	57	26857	3
Bacillus thuringiensis	c25	ASM222255v1	CP022345.1,CP022346.1	35	26795	3
Vibrio alginolyticus	NA	ASM214910v1	CP017896.1,CP017897.1,CP017898.1	80	26721	3
Arthrobacter sp. FB24	FB24	ASM19623v1	CP000454.1,CP000455.1,CP000456.1,CP000457.1	46	26714	3
Pseudomonas putida	KF715	ASM235609v1	AP015029.1,AP015030.1,AP015031.1,AP015032.1,AP015033.1	137	26604	3
Filifactor alocis ATCC 35896	ATCC 35896	ASM16389v2	CP002390.1	33	26511	3
Vibrio mimicus	SCCF01	ASM176735v1	CP016383.1,CP016384.1	111	26502	3
Salinicoccus halodurans	H3B36	ASM100590v1	CP011366.1	12	26406	3
Borrelia miyamotoi	Izh-16	ASM274180v1	CP024351.1,CP024353.1,CP024365.1,CP024366.1,CP024367.1,CP024368.1,CP024369.1,CP024356.1,CP024357.1,CP024358.1,CP024359.1,CP024360.1,CP024361.1,CP024363.1,CP024364.1,CP024362.1,CP024354.1,CP024355.1,CP024370.1,CP024352.1	109	26319	3
Klebsiella pneumoniae	UCLAOXA232KP	ASM174166v1	CP012561.1,CP012562.1,CP012563.1,CP012564.1,CP012565.1,CP012566.1,CP012567.1	122	26284	3
Klebsiella pneumoniae	UCLAOXA232KP	ASM174154v1	CP012568.1,CP012569.1,CP012570.1,CP012571.1,CP012572.1	88	26284	3
Pectobacterium atrosepticum	JG10-08	ASM69646v1	CP007744.1	28	26277	3
Bartonella bacilliformis	ATCC:35685D-5	ASM155903v1	CP014012.1	20	26219	3
Xylella fastidiosa subsp. pauca	De Donno	ASM211787v1	CP020870.1,CP020871.1	40	26138	3
Aeribacillus pallidus	KCTC3564	ASM224362v1	CP017703.1	260	26102	3
Geobacillus thermodenitrificans	KCTC3902	ASM207206v1	CP017694.1	33	26057	3
Marinobacter hydrocarbonoclasticus VT8	VT8	ASM1536v1	CP000514.1,CP000515.1,CP000516.1	110	26010	3
Corynebacterium flavescens	OJ8	ASM194146v1	CP009246.1	58	25997	3
Kosakonia radicincitans	GXGL-4A	ASM188767v1	CP015113.1	21	25991	3
Pseudomonas aeruginosa	H47921	ASM151634v1	CP008861.1	66	25987	3
Xanthomonas phaseoli pv. phaseoli	CFBP6546R	ASM275913v1	CP020971.1,CP020972.1,CP020973.1,CP020974.1	660	25986	3
Bacillus thuringiensis	ATCC 10792	ASM224368v1	CP020754.1,CP020755.1,CP020756.1,CP020757.1,CP020758.1,CP020759.1,CP020760.1	273	25880	3
Novibacillus thermophilus	SG-1	ASM200516v1	CP019699.1	112	25858	3
Cedecea neteri	FDAARGOS_392	ASM239344v1	CP023525.1,CP023526.1	73	25750	3
Prevotella intermedia ATCC 25611 = DSM 20706	ATCC 25611	ASM195395v1	CP019300.1,CP019301.1	56	25744	3
Planococcus donghaensis	DSM 22276	ASM168766v2	CP016543.2,CP016544.1	34	25716	3
Mycoplasma gallisepticum str. F	F	ASM2538v1	CP001873.1	27	25710	3
Shigella flexneri 1c	Y394	ASM244299v1	CP020753.1	339	25698	3
Acinetobacter pittii	YMC2010/8/T346	ASM201228v1	CP017938.1,CP017939.1	27	25667	3
Lactobacillus plantarum	KC3	ASM286875v1	CP025586.1,CP025587.1,CP025588.1,CP025589.1	62	25609	3
Vibrio scophthalmi	VS-12	ASM168546v1	CP016307.1,CP016308.1,CP016309.1,CP016311.1,CP016310.1	280	25593	3
Streptomyces hygroscopicus subsp. limoneus	KCTC 1717	ASM144707v1	CP013219.1,CP013220.1	188	25545	3
Lactobacillus delbrueckii subsp. bulgaricus 2038	2038	ASM19116v1	CP000156.1	68	25490	3
Bacillus thuringiensis	HD12	ASM159809v1	CP014847.1,CP014848.1,CP014849.1,CP014850.1,CP014851.1,CP014852.1,CP014853.1	333	25408	3
Acinetobacter baumannii TYTH-1	TYTH-1	ASM30257v1	CP003856.1	49	25361	3
Acinetobacter baumannii	XH860	ASM157306v1	CP014538.1	56	25294	3
Candidatus Arthromitus sp. SFB-mouse-NL	NA	ASM70943v1	CP008713.1	15	25292	3
Lactobacillus delbrueckii subsp. lactis	KCCM 34717	ASM188890v1	CP018215.1	255	25279	3
Escherichia coli	08-00022	ASM167751v1	CP013662.1,CP012501.1	173	25248	3
Staphylococcus aureus	GD705	ASM208907v1	CP019593.1	37	25166	3
Salmonella enterica subsp. enterica serovar Enteritidis	81-1705	ASM276341v1	CP018651.1,CP018652.1,CP018653.1,CP018654.1	57	25152	3
Citrobacter freundii	P10159	ASM128100v1	CP012554.1	69	25150	3
Lactobacillus delbrueckii subsp. bulgaricus	NA	Lactobacillus_bulgaricus_ACA-DC_87	LT899687.1	68	25136	3
Mycobacterium tuberculosis	Beijing-like/36918	ASM211677v1	CP017594.1	85	25112	3
Lactobacillus amylolyticus	L6	ASM207510v1	CP020457.1,CP020458.1	38	25100	3
Synechocystis sp. PCC 6803	PCC 6803	ASM972v1	BA000022.2,AP004311.1,AP004312.1,AP004310.1,AP006585.1	181	25086	3
Synechocystis sp. PCC 6803	PCC 6803	ASM34078v1	CP003265.1,CP003270.1,CP003271.1,CP003272.1,CP003267.1,CP003268.1,CP003266.1,CP003269.1	156	25086	3
Salmonella enterica subsp. enterica	16A242	ASM216399v1	CP020922.1,CP020923.1,CP020924.1	54	25075	3
Escherichia coli	C7	ASM190142v1	CP010240.1,CP010241.1	120	25058	3
Prevotella intermedia	strain 17	ASM195393v1	CP019302.1,CP019303.1	119	25044	3
Erythrobacter flavus	VG1	ASM223761v1	CP022528.1	8	25043	3
Oblitimonas alkaliphila	C6819	ASM126719v1	CP012359.1	11	25020	3
Salmonella enterica subsp. enterica serovar Braenderup	SA20026289	ASM223477v1	CP022490.1	39	24970	3
Salmonella enterica subsp. enterica serovar Mbandaka	SA20026234	ASM223451v1	CP022489.1	38	24932	3
Bordetella bronchiseptica 253	253	ASM31801v1	HE965806.1	50	24920	3
Desulfomonile tiedjei DSM 6799	DSM 6799	ASM26694v1	CP003360.1,CP003361.1	98	24859	3
Escherichia coli O7:K1 str. CE10	CE10	ASM22762v1	CP003034.1,CP003035.1,CP003036.1,CP003037.1,CP003038.1	166	24832	3
Ralstonia solanacearum	RS 489	ASM254981v1	CP021766.1,CP021767.1	249	24799	3
Ralstonia solanacearum	UY031	ASM129955v1	CP012687.1,CP012688.1	249	24798	3
Cupriavidus sp. USMAHM13	USMAHM13	ASM185428v1	CP017751.1,CP017752.1,CP017753.1	118	24795	3
Ralstonia solanacearum	RS 488	ASM250156v1	CP021652.1,CP021653.1	249	24789	3
Bordetella bronchiseptica	ATCC:BAA-588D-5	ASM155905v1	CP014013.1	35	24784	3
Tenacibaculum dicentrarchi	AY7486TD	ASM148338v1	CP013671.1	68	24763	3
Escherichia coli	C3	ASM190051v1	CP010119.1,CP010120.1	132	24740	3
Dehalococcoides mccartyi GT	GT	ASM2558v1	CP001924.1	6	24737	3
Escherichia coli	S17-20	ASM281268v1	CP025036.1	91	24735	3
Enterobacter hormaechei subsp. oharae	DSM 16687	ASM172970v1	CP017180.1	63	24661	3
Streptomyces albus J1074	J1074	ASM35952v1	CP004370.1	34	24652	3
Lactobacillus amylovorus DSM 20531	DSM 20531	ASM270637v1	CP017706.1	103	24650	3
Enterococcus faecium	NA	ASM202506v1	CP019988.1,CP019989.1,CP019990.1,CP019991.1	367	24525	3
Borrelia recurrentis A1	A1	ASM1970v1	CP000993.1,CP000994.1,CP000995.1,CP000996.1,CP000997.1,CP000998.1,CP000999.1,CP001000.1	26	24388	3
Microcystis aeruginosa PCC 7806SL	PCC 7806SL	ASM209597v1	CP020771.1	368	24302	3
Escherichia coli	28RC1	ASM161247v1	CP015020.1,CP015021.1	202	24261	3
Campylobacter fetus subsp. venerealis str. 84-112	84-112	CFV	HG004426.1,HG004427.1	50	24257	3
Mycoplasma mycoides subsp. mycoides SC str. PG1	PG1	ASM1144v1	BX293980.2	133	24235	3
Vibrio alginolyticus	K10K4	ASM211958v1	CP017911.1,CP017912.1	76	24120	3
Massilia sp. B2	B2	ASM275267v1	CP024608.1,CP024609.1	100	24091	3
Rhodococcus qingshengii	djl-6-2	ASM289396v1	CP025959.1,CP025960.1,CP025961.1,CP025962.1	38	24071	3
Staphylococcus aureus	GD5	ASM208905v1	CP019592.1	39	23982	3
Proteus mirabilis	AOUC-001	ASM164098v1	CP015347.1	90	23964	3
Enterobacter sp. FY-07	FY-07	ASM158207v1	CP012487.1,CP012488.1,CP012489.1,CP012490.1	36	23951	3
Escherichia coli	CFSAN029787	ASM100791v1	CP011416.1,CP011417.1,CP011418.1	257	23847	3
Prevotella intermedia	KCOM 2837	ASM276374v1	CP024723.1,CP024724.1	93	23802	3
Corynebacterium glutamicum	TQ2223	ASM216391v1	CP020658.1	39	23753	3
Bradyrhizobium sp. SK17	SK17	ASM283158v1	CP025113.1,CP025114.1	55	23701	3
Polaribacter sp. BM10	BM10	ASM200542v1	CP019704.1	34	23684	3
Cellvibrio sp. PSBB023	PSBB023	ASM200760v1	CP019799.1	18	23652	3
Porphyromonas gingivalis	KCOM 2799	ASM275395v1	CP024601.1	108	23631	3
Helicobacter bilis	AAQJH	ASM199998v1	CP019645.1	113	23569	3
Pirellula sp. SH-Sr6A	SH-Sr6A	ASM161087v1	CP011272.1	162	23546	3
Escherichia coli	ECONIH5	ASM290310v1	CP026202.1,CP026208.1,CP026203.1,CP026206.1,CP026207.1,CP026204.1,CP026205.1,CP026209.1	631	23529	3
Mycoplasma gallisepticum VA94_7994-1-7P	VA94_7994-1-7P	ASM28667v1	CP003506.1	21	23490	3
Acidipropionibacterium acidipropionici	F3E8	ASM185533v1	CP015970.1	42	23452	3
Citrobacter freundii	SL151	ASM171805v1	CP016952.1,CP017058.1,CP017059.1	156	23350	3
Enterococcus wangshanyuanii	MN05	ASM219764v1	CP021874.1,CP021875.1,CP021876.1,CP021877.1,CP021878.1	80	23179	3
Escherichia coli O111:H- str. 11128	11128	ASM1076v1	AP010960.1,AP010961.1,AP010962.1,AP010963.1,AP010964.1,AP010965.1	354	23147	3
Arthrobacter crystallopoietes	DSM 20117	ASM284971v1	CP018863.1,CP018865.1,CP018864.1	80	23135	3
Bacteroides fragilis	Q1F2	ASM284969v1	CP018937.1,CP018938.1,CP018939.1	61	23122	3
Escherichia coli	SMN152SH1	ASM286368v1	CP024618.1,CP024617.1,CP024616.1,CP024615.1	406	23090	3
Lactobacillus delbrueckii subsp. bulgaricus ATCC 11842 = JCM 1002	ATCC 11842	ASM5606v1	CR954253.1	67	23088	3
Klebsiella pneumoniae	KPNIH49	ASM290302v1	CP026178.1,CP026179.1,CP026182.1,CP026186.1,CP026181.1,CP026180.1,CP026185.1,CP026184.1,CP026183.1	558	23073	3
Staphylococcus aureus	GD1677	ASM208909v1	CP019595.1	31	23070	3
Lactobacillus delbrueckii subsp. bulgaricus	DSM 20080	ASM195313v1	CP019120.1	68	23062	3
Enterococcus faecium NRRL B-2354	NRRL B-2354	ASM33640v1	CP004063.1,CP004064.1	78	23058	3
Lactobacillus delbrueckii subsp. bulgaricus	MN-BM-F01	ASM146977v1	CP013610.1	64	23058	3
Salmonella enterica subsp. enterica serovar Typhimurium	VNP20009	ASM71515v2	CP007804.2,CP008745.1	67	22941	3
Salmonella enterica subsp. enterica serovar Typhimurium	NC983	ASM170536v1	CP015157.1,CP015158.1	68	22940	3
Salmonella enterica subsp. enterica serovar Typhimurium str. 14028S	14028S	ASM2216v1	CP001363.1,CP001362.1	65	22940	3
Salmonella enterica subsp. enterica serovar Newport str. Levine 1	Levine 1	ASM27188v2	CP015923.1	49	22919	3
Pseudomonas syringae pv. syringae B301D	B301D	ASM98848v1	CP005969.1	34	22908	3
Leuconostoc mesenteroides subsp. mesenteroides	DRC0211	ASM200937v1	CP013016.1,CP013017.1,CP014602.1,CP014603.1,CP014604.1	23	22885	3
Staphylococcus nepalensis	JS11	ASM244293v1	CP017466.1,CP017467.1,CP017468.1	32	22800	3
Lactococcus lactis subsp. lactis KLDS 4.0325	KLDS 4.0325	ASM47937v2	CP006766.1,CP006767.1,CP007042.1,CP007043.1	49	22781	3
Pseudomonas sp. MRSN12121	MRSN12121	ASM93146v1	CP010892.1,CP010893.1,CP010894.1	43	22742	3
Flavobacterium communis	PK15	ASM185796v1	CP017774.1	47	22683	3
Staphylococcus aureus	293G	ASM208903v1	CP019591.1	37	22668	3
Bacillus amyloliquefaciens	MBE1283	ASM148388v1	CP013727.1,CP013728.1	24	22648	3
Bacillus glycinifermentans	KBN06P03352	ASM244309v1	CP023481.1	59	22638	3
Carnobacterium sp. CP1	CP1	ASM148396v1	CP010796.1,CP010819.1	28	22638	3
Flavobacterium columnare	C#2	ASM164118v1	CP015107.1	87	22624	3
Pseudomonas sp. TCU-HL1	TCU-HL1	ASM170850v1	CP015992.1,CP015993.1	127	22608	3
Klebsiella aerogenes	FDAARGOS_139	ASM159358v1	CP014748.1,CP014747.1	36	22598	3
Klebsiella pneumoniae	SKGH01	ASM164476v1	CP015500.1,CP015501.1,CP015502.1,CP015503.1,CP015504.1,CP015505.1	123	22571	3
Bacillus mycoides	Gnyt1	ASM210457v1	CP020743.1,CP020744.1,CP020745.1,CP020746.1,CP020747.1,CP020748.1,CP020749.1,CP020750.1,CP020751.1	230	22564	3
Escherichia coli	FORC_043	ASM221474v2	CP016828.1,CP023552.1	129	22561	3
Vibrio fluvialis	12605	ASM195295v1	CP019118.1,CP019119.1	61	22550	3
Yersinia enterocolitica subsp. palearctica Y11	Y11	ASM25317v1	FR729477.2,FR745874.1	121	22546	3
Klebsiella pneumoniae	BK13043	ASM215672v1	CP020837.1,CP020838.1,CP020839.1,CP020840.1	119	22508	3
Bacillus thuringiensis	KNU-07	ASM169267v1	CP016588.1,CP016589.1,CP016590.1	111	22493	3
Pseudomonas aeruginosa VRFPA04	VRFPA04	ASM47374v3	CP008739.2	411	22445	3
Escherichia coli O157:H7	FRIK944	ASM169551v1	CP016625.1,CP016626.1	252	22434	3
Escherichia coli	SMN197SH3	ASM286366v1	CP024056.1,CP024055.1,CP024054.1,CP024053.1	350	22425	3
Methylobacterium extorquens	PSBB040	ASM197166v1	CP019322.1	55	22406	3
Vibrio anguillarum	S3 4/9	ASM221200v1	CP022099.1,CP022100.1	121	22396	3
Escherichia coli O157:H7 str. SS17	SS17	ASM73034v1	CP008805.1,CP008806.1,CP008807.1	232	22377	3
Mycoplasma fermentans M64	M64	ASM18600v1	CP002458.1	42	22355	3
Klebsiella pneumoniae subsp. pneumoniae MGH 78578	ATCC 700721; MGH 78578	ASM1630v1	CP000647.1,CP000648.1,CP000649.1,CP000650.1,CP000651.1,CP000652.1	154	22331	3
Escherichia coli	13E0780	ASM205724v1	CP020106.1	171	22327	3
Macrococcus caseolyticus	IMD0819	ASM211982v1	CP021058.1	65	22267	3
Salmonella enterica subsp. enterica serovar Typhimurium	TW-Stm6	ASM221002v1	CP019649.1,CP019647.1,CP019648.1	104	22200	3
Onion yellows phytoplasma OY-M	onion yellows	ASM984v1	AP006628.2	38	22161	3
Escherichia coli	O177:H21	ASM169363v1	CP016546.1,CP016547.1,CP016548.1,CP016549.1,CP016550.1,CP016551.1	216	22109	3
Ralstonia pickettii 12D	12D	ASM2342v1	CP001644.1,CP001645.1,CP001646.1,CP001647.1,CP001648.1	40	22061	3
Paenibacillus larvae subsp. pulvifaciens	SAG 10367	ASM208215v1	CP020557.1,CP020558.1	228	22046	3
Photobacterium damselae subsp. piscicida	91-197	ASM235623v1	AP018045.1,AP018046.1,AP018047.1,AP018048.1	2198	22019	3
Campylobacter lari NCTC 11845	NCTC 11845	ASM81636v1	CP007775.1	100	22012	3
Bacillus licheniformis	SRCM100141	ASM217367v1	CP021669.1,CP021671.1,CP021670.1	47	21981	3
Ochrobactrum pituitosum	AA2	ASM202562v1	CP018779.1,CP018782.1,CP018780.1,CP018781.1	144	21948	3
Bacillus cereus	ISSFR-3F	ASM194190v1	CP018931.1,CP018932.1	46	21936	3
Yangia sp. CCB-MM3	CCB-MM3	ASM168710v1	CP014595.1,CP014596.1,CP014597.1,CP014598.1,CP014599.1,CP014600.1,CP014601.1	148	21932	3
Escherichia coli O121:H19	16-9255	ASM284416v1	CP022407.1,CP022408.1	289	21892	3
Cryobacterium sp. LW097	LW097	ASM220549v1	CP021992.1,CP021994.1,CP021993.1	57	21840	3
Staphylococcus simulans	FDAARGOS_383	ASM238618v1	CP023497.1,CP023496.1	91	21839	3
Staphylococcus equorum	KM1031	ASM168331v1	CP013980.1,CP013981.1,CP013982.1,CP013983.1	22	21829	3
Escherichia coli	SLK172	ASM193631v1	CP017631.1,CP017632.1,CP017633.1	351	21769	3
Salmonella enterica subsp. enterica serovar Typhimurium	RM9437	ASM161758v1	CP012985.1,CP014577.1	65	21756	3
Escherichia coli	H2	ASM190079v1	CP010163.1,CP010164.1,CP010165.1,CP010166.1	249	21751	3
Aeromonas salmonicida subsp. salmonicida A449	A449	ASM19639v1	CP000644.1,CP000645.1,CP000646.1,AY301063.1,AY301064.1,AY301065.1	209	21740	3
Burkholderia thailandensis	2002721643	ASM171863v1	CP013411.1,CP013413.1,CP013412.1	407	21703	3
Chryseobacterium piperi	ATCC BAA-1782	ASM228563v2	CP023049.2	104	21692	3
Citrobacter sp. FDAARGOS_156	FDAARGOS_155	ASM155923v1	CP014030.1	27	21685	3
Nitrosococcus halophilus Nc 4	Nc 4	ASM2472v1	CP001798.1,CP001799.1	110	21674	3
Salmonella enterica subsp. enterica serovar Saintpaul	SA20031783	ASM223473v1	CP022491.1,CP022492.1,CP022493.1	30	21674	3
Pseudomonas aeruginosa	PB354	ASM281288v1	CP025053.1,CP025054.1	28	21648	3
Chromobacterium vaccinii	21-1	ASM185527v1	CP017707.1	41	21604	3
Streptococcus agalactiae	WC1535	ASM172992v1	CP016501.1	71	21564	3
Streptomyces lydicus	103	ASM172948v1	CP017157.1	32	21553	3
Enterococcus mundtii	DSM 4838	ASM281375v1	CP018061.1,CP018062.1	46	21506	3
Escherichia coli O178:H19	2012C-4431	ASM274159v1	CP024289.1,CP024290.1,CP024291.1,CP024292.1	108	21501	3
Xylella fastidiosa MUL0034	MUL0034	ASM69882v1	CP006740.1,CP006739.1	74	21474	3
Vibrio nigripulchritudo	SFn1	ASM80127v1	FO203526.1,FO203527.1	44	21467	3
Escherichia coli	14EC001	ASM285532v1	CP024127.1,CP024128.1,CP024129.1,CP024130.1	367	21461	3
Bacillus thuringiensis	YC-10	ASM101763v1	CP011349.1,CP011350.1,CP011355.1,CP011356.1,CP011357.1,CP011358.1,CP011351.1,CP011352.1,CP011353.1,CP011354.1	497	21430	3
Plautia stali symbiont	NA	ASM18017v2	AP012551.1,AP012552.1,AP012553.1	166	21422	3
Yersinia enterocolitica LC20	LC20	ASM59794v2	CP007448.2,CP007449.2,CP007450.2	241	21375	3
Xylella fastidiosa M12	M12	ASM1932v1	CP000941.1	52	21366	3
Cupriavidus sp. USMAA2-4	USMAA2-4	ASM185430v1	CP017748.1,CP017749.1,CP017750.1	194	21334	3
Escherichia coli SE11	SE11	ASM1038v1	AP009240.1,AP009241.1,AP009242.1,AP009243.1,AP009244.1,AP009245.1,AP009246.1	80	21328	3
Salmonella enterica subsp. enterica serovar Derby	SA20035215	ASM223475v1	CP022494.1,CP022495.1,CP022496.1	39	21321	3
Aeromonas veronii	TH0426	ASM159324v1	CP012504.1	67	21319	3
Cronobacter sakazakii ATCC BAA-894	ATCC BAA-894	ASM1766v1	CP000783.1,CP000784.1,CP000785.1	24	21297	3
Microbacterium paludicola	CC3	ASM188728v1	CP018134.1	10	21288	3
Mannheimia haemolytica	193	ASM228581v1	CP023043.1	75	21251	3
Mannheimia haemolytica	186	ASM228561v1	CP023047.1	75	21251	3
Mannheimia haemolytica	191	ASM228557v1	CP023044.1,CP023045.1	75	21251	3
Mannheimia haemolytica D174	D174	ASM42209v1	CP006574.1	63	21251	3
Salmonella enterica subsp. enterica serovar Poona str. ATCC BAA-1673	ATCC BAA-1673	ASM49329v2	CP019189.1,CP019190.1,CP019191.1	75	21237	3
Escherichia coli O26:H11 str. 11368	11368	ASM9100v1	AP010953.1,AP010954.1,AP010955.1,AP010956.1,AP010957.1	272	21223	3
Lactobacillus plantarum	BLS41	ASM211695v1	CP018209.1,CP018210.1,CP018211.1,CP018212.1,CP018213.1,CP018214.1	70	21205	3
Acinetobacter baumannii LAC-4	LAC-4	ASM78673v1	CP007712.1,CP007713.1,CP007714.1	106	21128	3
Klebsiella sp. LTGPAF-6F	LTGPAF-6F	ASM175318v1	CP017450.1,CP017451.1,CP017452.1	192	21125	3
Acinetobacter sp. DUT-2	DUT-2	ASM158197v1	CP014651.1,CP014652.1,CP014653.1,CP014654.1,CP014655.1,CP014656.1	128	21102	3
Myroides odoratimimus	PR63039	ASM148165v1	CP013690.1,CP013691.1	83	21095	3
Bacillus weihaiensis	Alg07	ASM188916v1	CP016020.1,CP016021.1	50	21090	3
Bacillus coagulans	S-lac	ASM103949v1	CP011939.1	154	21080	3
Phaeobacter inhibens	P66	ASM289206v1	CP010705.1,CP010706.1,CP010707.1,CP010708.1,CP010709.1,CP010710.1,CP010711.1,CP010712.1,CP010713.1,CP010714.1	40	21078	3
Rhodobacter sphaeroides	MBTLJ-20	ASM270632v1	CP015287.1,CP015288.1,CP015289.1,CP015290.1,CP015291.1,CP015292.1,CP015293.1	60	21078	3
Klebsiella pneumoniae subsp. pneumoniae	AUSMDU00008079	ASM224997v1	CP022691.1,CP022692.1,CP022693.1,CP022694.1	140	21077	3
Xanthomonas campestris pv. campestris str. CN12	CN12	ASM277677v1	CP017310.1	89	21072	3
Escherichia coli	CFSAN061770	ASM227811v2	CP023142.1,CP023143.1,CP023144.1,CP023145.1	192	21051	3
Novosphingobium pentaromativorans US6-1	US6-1	ASM76746v1	CP009291.1,CP009294.1,CP009296.1,CP009292.1,CP009293.1,CP009295.1	96	21040	3
Xanthomonas citri pv. phaseoli var. fuscans	CFBP6988R	ASM275927v1	CP020979.1,CP020980.1	44	21038	3
Citrobacter amalonaticus Y19	Y19	ASM98180v1	CP011132.1,CP011133.1	66	21032	3
Lactobacillus plantarum	DF	ASM170433v1	CP013753.1,CP013754.1,CP013755.1,CP013756.1	71	21022	3
Bacillus flexus	KLBMP 4941	ASM202426v1	CP016790.1,CP016791.1,CP016792.1	83	21004	3
Escherichia coli	CRE1540	ASM286008v1	CP019051.1,CP019052.1,CP019053.1,CP019054.1,CP019055.1	185	20992	3
Escherichia coli O15:H11	90-9272	ASM274121v1	CP024239.1,CP024238.1	273	20987	3
Deinococcus radiodurans R1	R1	ASM163882v1	CP015081.1,CP015082.1,CP015084.1,CP015083.1	96	20986	3
Bacillus thuringiensis serovar kurstaki str. HD73	HD73	ASM33875v1	CP004069.1,CP004072.1,CP004073.1,CP004076.1,CP004070.1,CP004071.1,CP004074.1,CP004075.1	309	20983	3
Enterobacter cloacae complex sp. 35734	35734	ASM80741v4	CP012162.1,CP012163.1,CP010360.2,CP012164.1	99	20973	3
Streptococcus pyogenes	MGAS11027	ASM163589v1	CP013838.1	24	20970	3
Escherichia coli O145:H28 str. RM12761	RM12761	ASM66239v1	CP007133.1,CP007135.1,CP007134.1	187	20956	3
Escherichia coli O145:H28 str. RM13516	RM13516	ASM52005v1	CP006262.1,CP006263.1,CP006264.1	187	20956	3
Vibrio alginolyticus	K01M1	ASM211950v1	CP017889.1,CP017890.1	71	20893	3
Escherichia coli O145:H28 str. RM12581	RM12581	ASM67129v1	CP007136.1,CP007138.1,CP007137.1	292	20882	3
Escherichia coli O145:H28 str. RM13514	RM13514	ASM52003v1	CP006027.1,CP006028.1,CP006029.1	292	20882	3
Lactobacillus amylophilus DSM 20533 = JCM 1125	DSM 20533	ASM193633v1	CP018888.1	25	20882	3
Acinetobacter baumannii	CMC-CR-MDR-Ab66	ASM192224v1	CP016300.1,CP016301.1,CP016302.1	87	20860	3
Staphylococcus aureus	V2200	ASM104609v2	CP007657.1,CP007658.1	35	20807	3
Idiomarina piscisalsi	10PY1A	ASM221176v1	CP022133.1	14	20793	3
Salmonella enterica subsp. enterica	RM11060	ASM250412v1	CP022658.1,CP022659.1,CP022660.1	58	20791	3
Pseudomonas syringae CC1557	CC1557	ASM45270v3	CP007014.1,CP007015.1	40	20751	3
Xanthomonas citri pv. phaseoli var. fuscans	CFBP6990	ASM275931v1	CP020983.1,CP020984.1	46	20729	3
Klebsiella pneumoniae subsp. pneumoniae	ST101:960186733	ASM131656v3	CP023487.1,CP023488.1,CP023489.1	160	20717	3
Mycobacterium bovis BCG str. Moreau RDJ	Moreau RDJ	ASM96728v1	AM412059.2	58	20705	3
Staphylococcus nepalensis	JS1	ASM244289v1	CP017460.1,CP017461.1,CP017462.1	36	20701	3
Vibrio tapetis subsp. tapetis	NA	Vibrio_tapetis_CECT4600	LT960611.1,LT960612.1,LT960613.1	302	20669	3
Salmonella enterica subsp. enterica serovar Hvittingfoss str. SA20014981	SA20014981	ASM144870v2	CP022503.1	33	20662	3
Proteus mirabilis	AR_0156	ASM219740v1	CP021852.1,CP021853.1,CP021854.1,CP021855.1	81	20609	3
Bacillus velezensis	9912D	ASM185798v1	CP017775.1,CP017776.1	63	20562	3
Polynucleobacter asymbioticus	Tro8F10W22	ASM187458v1	CP015018.1	16	20554	3
Escherichia coli	472	ASM189024v1	CP018245.1,CP018246.1	197	20485	3
Raoultella ornithinolytica	MG	ASM186653v1	CP017802.1	41	20484	3
Escherichia coli O157	FDAARGOS_293	ASM220886v1	CP022050.1,CP022051.1,CP022052.1	283	20475	3
Psychrobacter sp. AntiMn-1	AntiMn-1	ASM185406v1	CP012969.1	55	20431	3
Komagataeibacter medellinensis NBRC 3288	NBRC 3288	ASM18274v1	AP012159.1,AP012160.1,AP012161.1,AP012162.1,AP012163.1,AP012164.1,AP012165.1,AP012166.1	127	20427	3
Klebsiella pneumoniae	PMK1	ASM76461v1	CP008929.1,CP008930.1,CP008931.1,CP008932.1,CP008933.1	181	20414	3
Escherichia coli O25b:H4	O25b:H4	ASM187448v1	CP015085.1,CP015086.1,CP015087.1,CP015088.1	142	20409	3
Shigella flexneri 1a	228	ASM157812v1	CP012735.1,CP012732.1,CP012733.1,CP012734.1,CP012736.1	662	20407	3
Pseudomonas frederiksbergensis	KNU-15	ASM235531v1	CP023466.1	33	20398	3
Xenorhabdus doucetiae	FRM16	ASM96819v1	FO704550.1,FO704549.1	146	20375	3
Staphylococcus aureus	NA	Sa_Newman_UoM	LT598688.1	42	20369	3
Staphylococcus aureus subsp. aureus	Newman_D2C	ASM231039v1	CP023391.1	42	20369	3
Staphylococcus aureus subsp. aureus str. Newman	Newman	ASM1046v1	AP009351.1	42	20369	3
Staphylococcus aureus subsp. aureus str. Newman	NYU_Newman	ASM231043v1	CP023390.1	42	20369	3
Salmonella enterica subsp. enterica serovar Manhattan	SA20084699	ASM223479v1	CP022497.1,CP022498.1,CP022499.1	45	20328	3
Escherichia coli	155	ASM189020v1	CP018237.1,CP018238.1	207	20300	3
Streptococcus gallolyticus subsp. gallolyticus ATCC BAA-2069	ATCC BAA-2069	ASM20319v1	FR824043.1,FR824044.1	21	20300	3
Lactobacillus delbrueckii subsp. lactis	KCTC 3035	ASM188898v1	CP018156.1	84	20274	3
Lysinibacillus sphaericus	2362	ASM162973v1	CP015224.1	52	20266	3
Propionibacterium freudenreichii subsp. shermanii	NA	PFREUDJS1	LN997841.1	76	20254	3
Pseudomonas cerasi	NA	PCPL58T	LT222319.1,LT222313.1,LT222314.1,LT222315.1,LT222316.1,LT222317.1,LT222318.1	459	20227	3
Lactobacillus johnsonii	BS15	ASM171474v1	CP016400.1,CP016630.1	67	20211	3
Staphylococcus aureus	GD1539	ASM208911v1	CP019594.1	41	20172	3
Xanthomonas citri subsp. malvacearum	AR81009	ASM228856v1	CP023155.1,CP023156.1,CP023157.1,CP023158.1	441	20170	3
Pseudomonas aeruginosa	Pa1242	ASM220537v1	CP022002.1	52	20159	3
Bartonella sp. 1-1C	NA	ASM281032v1	CP019489.1	38	20157	3
Bacillus thuringiensis HD-771	HD-771	ASM29245v1	CP003752.1,CP003753.1,CP003754.1,CP003755.1,CP003756.1,CP003757.1,CP003758.1,CP003759.1,CP003760.1	179	20151	3
Vibrio sp. Q67	Q67	ASM225754v1	CP022741.1,CP022742.1	226	20097	3
Yersinia pseudotuberculosis	MD67	ASM83435v1	CP009757.1	67	20097	3
Pandoraea pnomenusa	MCB032	ASM163627v1	CP015371.1,CP015372.1,CP015373.1,CP015374.1	60	20093	3
Streptomyces puniciscabiei	TW1S1	ASM173580v1	CP017248.1	96	20092	3
Vibrio alginolyticus	K04M5	ASM211954v1	CP017899.1,CP017900.1,CP017901.1	85	20078	3
Synechococcus sp. NIES-970	NIES-970	ASM235621v1	AP017959.1,AP017960.1,AP017961.1,AP017962.1,AP017963.1	14	20064	3
Vibrio parahaemolyticus	MAVP-R	HGAP	CP022552.1,CP022553.1,CP022554.1,CP022555.1	118	20056	3
Ectothiorhodospira sp. BSL-9	BSL-9	ASM163284v1	CP011994.1	113	20051	3
Laribacter hongkongensis HLHK9	HLHK9	ASM2102v1	CP001154.1	42	20034	3
Geobacillus thermoleovorans	ID-1	ASM270656v1	CP017690.1,CP017691.1	163	19958	3
Serratia marcescens	RSC-14	ASM128036v1	CP012639.1	26	19943	3
Erythrobacter litoralis	DSM 8509	ASM171916v1	CP017057.1	19	19923	3
Paenibacillus sp. lzh-N1	lzh-N1	ASM287243v1	CP025696.1	52	19923	3
Klebsiella pneumoniae 500_1420	500_1420	ASM40676v2	CP011980.1,CP011984.1,CP011981.1,CP011983.1,CP011982.1	103	19891	3
Mycobacterium gilvum PYR-GCK	PYR-GCK	ASM1636v1	CP000656.1,CP000657.1,CP000658.1,CP000659.1	124	19879	3
Yersinia enterocolitica	YE5	ASM170861v1	CP016940.1,CP016939.1,CP016941.1	152	19873	3
Escherichia coli	CFSAN004176	ASM172122v1	CP014583.1,CP012493.1,CP012492.1,CP012491.1	332	19870	3
Helicobacter pylori J99	J99	ASM98269v1	CP011330.1	35	19870	3
Streptomyces sp. S063	S063	ASM283267v1	CP021707.1	48	19868	3
Herminiimonas arsenitoxidans	AS8	Herminiimonas_arsenitoxidans	LT671418.1	14	19858	3
Rhodobacter sphaeroides ATCC 17029	NA	ASM1598v1	CP000577.1,CP000578.1,CP000579.1	39	19849	3
Bacillus subtilis	Bs-115	ASM209609v1	CP020722.1	89	19842	3
Escherichia coli	PA20	ASM186529v1	CP017669.1,CP017670.1	193	19786	3
Moritella viscosa	NA	MVIS1	LN554852.1,LN554854.1,LN554853.1	91	19785	3
Croceicoccus naphthovorans	PQ-2	ASM102870v1	CP011770.1,CP011771.1,CP011772.1	85	19775	3
Pseudomonas aeruginosa	M37351	ASM151638v1	CP008863.1	80	19747	3
Thauera chlorobenzoica	3CB1	ASM192230v1	CP018839.1	59	19738	3
Thauera sp. MZ1T	MZ1T	ASM2176v1	CP001281.2,CP001282.1	66	19735	3
Vibrio cholerae MJ-1236	MJ-1236	ASM2258v1	CP001485.1,CP001486.1	86	19728	3
Escherichia coli	GB089	ASM167896v1	CP013663.1,CP012499.1	139	19725	3
Escherichia coli	SRCC 1675	ASM161249v1	CP015023.1,CP015022.1	196	19725	3
Escherichia coli O157:H7	3384	ASM175354v1	CP017440.1,CP017441.1	189	19703	3
Escherichia coli O157:H7 str. Sakai	Sakai	ASM886v1	BA000007.2,AB011549.2,AB011548.2	191	19693	3
Rathayibacter tritici	NCPPB 1953	ASM164100v1	CP015515.1	107	19680	3
Rhodobacter sphaeroides	MBTLJ-8	ASM157659v1	CP012960.1,CP012961.1,CP012962.1,CP012963.1,CP012964.1,CP012965.1,CP012966.1,CP012967.1	88	19678	3
Weissella cibaria	CMU	ASM195107v1	CP013936.1,CP013937.1,CP013938.1	36	19672	3
Lactobacillus fermentum 3872	3872	ASM46678v3	CP011536.1,CP011537.1	165	19657	3
Bacillus amyloliquefaciens	LM2303	ASM188928v1	CP018152.1	28	19648	3
Pseudomonas azotoformans	S4	ASM157980v1	CP014546.1	29	19605	3
Bacillus cereus	ISSFR-9F	ASM194188v1	CP018933.1,CP018934.1	47	19596	3
Bifidobacterium asteroides DSM 20089	DSM 20089	ASM271586v1	CP017696.1	16	19587	3
Escherichia coli	2012C-4227	ASM142093v1	CP013029.1,CP013028.1,CP013030.1	320	19575	3
Leuconostoc mesenteroides subsp. dextranicum	DSM 20484	ASM104769v1	CP012009.1,CP012010.1	56	19574	3
Klebsiella pneumoniae	KPNIH50	ASM290300v1	CP026177.1,CP026175.1,CP026174.1,CP026176.1,CP026172.1,CP026173.1	324	19573	3
Prevotella jejuni	CD3:33	ASM284979v1	CP023863.1,CP023864.1	219	19558	3
Xylella fastidiosa	Fb7	ASM145633v2	CP010051.1,CP014330.1	75	19549	3
Bacillus velezensis	SRCM101413	ASM220197v1	CP021890.1,CP021891.1	47	19543	3
Synechococcus sp. WH 8103	NA	WH8103.1	LN847356.1	20	19538	3
Rhodococcus jostii RHA1	RHA1	ASM1456v1	CP000431.1,CP000432.1,CP000433.1,CP000434.1	271	19525	3
Enterococcus faecium	NA	ASM202504v1	CP019992.1,CP019993.1,CP019994.1,CP019995.1	473	19479	3
Yersinia pestis	Cadman	ASM169359v1	CP016273.1,CP016274.1,CP016275.1,CP016276.1	376	19477	3
Lactobacillus johnsonii	UMNLJ22	ASM217683v1	CP021704.1,CP021705.1,CP021706.1	104	19420	3
Escherichia coli	MS6198	ASM172152v1	CP015834.1,CP015835.1,CP015836.1,CP015837.1,CP015838.1	136	19392	3
Acidovorax citrulli AAC00-1	AAC00-1	ASM1532v1	CP000512.1	108	19285	3
Lactobacillus coryniformis subsp. torquens DSM 20004 = KCTC 3535	DSM 20004	ASM270670v1	CP017697.1,CP017698.1,CP017699.1,CP017700.1,CP017701.1	281	19246	3
Escherichia coli	AR_0058	ASM218019v1	CP021689.1,CP021690.1	105	19231	3
Lactobacillus brevis	SRCM101174	ASM217355v1	CP021479.1,CP021478.1,CP021480.1,CP021481.1,CP021482.1,CP021483.1	171	19171	3
Staphylococcus aureus	V605	ASM164104v1	CP013959.1,CP013960.1	70	19168	3
Klebsiella pneumoniae	AR_0139	ASM220219v1	CP021960.1,CP021958.1,CP021959.1,CP021961.1,CP021962.1	207	19134	3
Gallionella capsiferriformans ES-2	ES-2	ASM14525v1	CP002159.1	41	19121	3
Mycoplasma fermentans JER	JER	ASM14862v1	CP001995.1	21	19110	3
Bacillus thuringiensis	YWC2-8	ASM142085v1	CP013055.1,CP013056.1,CP013057.1,CP013058.1,CP013059.1,CP013060.1,CP013061.1	369	19093	3
Herbaspirillum frisingense	AA6	ASM202572v1	CP018845.1	23	19082	3
Brucella sp. 09RB8910	09RB8910	ASM197180v1	CP019390.1,CP019391.1	64	19077	3
Bacillus thuringiensis serovar kurstaki str. YBT-1520	YBT-1520	ASM74754v1	CP007607.1,CP007612.1,CP007608.1,CP007615.1,CP007616.1,CP007613.1,CP007609.1,CP007610.1,CP007611.1,CP007614.1	511	19076	3
Vibrio vulnificus	CECT 4999	ASM221513v1	CP014636.1,CP014637.1,CP014638.1	373	19074	3
Pandoraea apista	DSM 16535	ASM146559v2	CP013481.2,CP013482.1	19	19069	3
Denitrobacterium detoxificans	NPOH1	ASM164377v1	CP011402.1	26	19033	3
Curtobacterium pusillum	AA3	ASM202564v1	CP018783.1,CP018784.1	19	19023	3
Proteus mirabilis	AR_0059	ASM205568v1	CP020052.1	66	18999	3
Xanthomonas campestris pv. campestris str. CN18	CN18	ASM277683v1	CP017319.1,CP017321.1,CP017320.1,CP017322.1	170	18995	3
Escherichia coli	EC1515	ASM219649v1	CP021844.1,CP021845.1,CP021846.1,CP021847.1	217	18988	3
Mycoplasma bovis	Ningxia-1	ASM274957v1	CP023663.1	85	18988	3
Sphingobium cloacae	JCM 10874	ASM235585v1	AP017655.1,AP017656.1,AP017657.1,AP017658.1,AP017659.1,AP017660.1,AP017661.1	254	18940	3
Klebsiella pneumoniae	FDAARGOS_444	ASM258716v1	CP023941.1,CP023940.1,CP023943.1,CP023942.1,CP023944.1	211	18935	3
Escherichia coli IAI1	IAI1	ASM2626v1	CU928160.2	51	18912	3
Klebsiella pneumoniae subsp. pneumoniae	KPNIH33	ASM77537v1	CP009771.1,CP009772.1,CP009773.1,CP009774.1	78	18909	3
Klebsiella pneumoniae	AR_0143	ASM218031v1	CP021708.1,CP021709.1,CP021710.1,CP021711.1,CP021712.1	194	18880	3
Escherichia coli	AR_0162	ASM218013v1	CP021683.1,CP021680.1,CP021681.1,CP021682.1,CP021684.1	167	18860	3
Escherichia coli	KSC9	ASM216365v1	CP018323.1	94	18797	3
Legionella pneumophila	E7_O	ASM175336v1	CP015954.1	30	18795	3
Rhodovulum sulfidophilum	DSM 2351	ASM154807v1	AP014800.1,AP014801.1,AP014802.1,AP014803.1	203	18792	3
Xanthomonas perforans	LH3	ASM190885v1	CP018475.1,CP018472.1,CP018476.1,CP018474.1,CP018473.1	31	18787	3
Salmonella enterica subsp. enterica serovar Typhi	NA	403Ty	LT905062.1	53	18773	3
Lactobacillus delbrueckii subsp. indicus	JCM 15610	ASM190841v1	CP018614.1,CP018612.1,CP018613.1	108	18747	3
Prevotella intermedia	17-2	ASM154819v1	AP014926.1,AP014925.1	123	18727	3
Lactobacillus plantarum	KP	ASM170431v1	CP013749.1,CP013750.1,CP013751.1,CP013752.1	77	18714	3
Corynebacterium glutamicum	CP	ASM144786v2	CP012194.1,CP012412.2	67	18713	3
Rhizorhabdus dicambivorans	Ndbn-20	ASM235527v1	CP023449.1,CP023450.1,CP023451.1,CP023452.1,CP023453.1	200	18678	3
Escherichia coli	2011C-4315	ASM164523v2	CP024479.1,CP024480.1,CP024481.1	176	18657	3
Staphylococcus aureus	MRSA107	ASM289538v1	CP018629.1	59	18640	3
Escherichia coli	PSUO103	ASM221515v1	CP014752.1,CP014753.1	165	18626	3
Mycobacterium tuberculosis	Beijing-like/50148	ASM211683v1	CP017597.1	84	18618	3
Mycoplasma mycoides subsp. mycoides	Ben181	ASM155409v1	CP011262.1	93	18618	3
Streptomyces sp. CdTB01	CdTB01	ASM148456v1	CP013743.1,CP013744.1	42	18600	3
Streptococcus macedonicus ACA-DC 198	ACA-DC 198	ASM28363v1	HE613569.1,HE613570.1	75	18595	3
Mycobacterium bovis BCG str. Mexico	Mexico	ASM23472v1	CP002095.1	63	18593	3
Mycobacterium bovis BCG str. Pasteur 1173P2	BCG Pasteur 1173P2	ASM944v1	AM408590.1	65	18593	3
Mycobacterium bovis BCG	26	ASM154473v1	CP010331.1	53	18592	3
Acetobacter pasteurianus	dm	ASM222019v1	CP022374.1	49	18568	3
Oblitimonas alkaliphila	E1148	ASM126729v1	CP012364.1	27	18524	3
Staphylococcus aureus	XN108	ASM70947v1	CP007447.1	44	18516	3
Turicibacter sp. H121	H121	ASM154334v1	CP013476.1	88	18498	3
Oscillatoria nigro-viridis PCC 7112	PCC 7112	ASM31747v1	CP003614.1,CP003615.1,CP003616.1,CP003617.1,CP003618.1,CP003619.1	402	18470	3
Massilia sp. WG5	WG5	ASM141259v1	CP012640.1,CP012641.1,CP012642.1	49	18433	3
Desulfovibrio vulgaris str. Hildenborough	Hildenborough	ASM19575v1	AE017285.1,AE017286.1	19	18389	3
Pseudomonas aeruginosa	Pa58	ASM219249v1	CP021775.1	77	18375	3
Alteromonas mediterranea MED64	MED64	ASM43949v1	CP004848.1	19	18367	3
Rhodoferax antarcticus	DSM 24876	ASM195573v1	CP019240.1,CP019241.1,CP019242.1	131	18340	3
Maribacter cobaltidurans	B1	ASM226938v1	CP022957.1	46	18326	3
Salmonella enterica subsp. enterica serovar Give	CFSAN024229	ASM286376v1	CP019174.1,CP019175.1	36	18309	3
Bacillus sp. FJAT-14266	FJAT-14266	ASM171922v1	CP017072.1	18	18294	3
Lysobacter capsici	KNU-14	ASM235529v1	CP023465.1	20	18277	3
Nocardia seriolae	EM150506	ASM186585v1	CP017839.1	369	18266	3
Rickettsia felis URRWXCal2	URRWXCal2; California 2	ASM1214v1	CP000053.1,CP000054.1,CP000055.1	52	18198	3
Streptomyces sp. 3211	3211	ASM202838v1	CP020039.1,CP020040.1,CP020041.1	182	18171	3
Clostridium botulinum	B515	ASM286612v1	CP014219.1,CP014220.1,CP014221.1,CP014218.1	25	18167	3
Bacillus cereus	FORC_024	ASM172114v1	CP012691.1	39	18165	3
Bacillus licheniformis	SRCM100027	ASM217425v1	CP021677.1,CP021678.1,CP021679.1	64	18151	3
Burkholderia cepacia JBK9	JBK9	ASM70116v2	CP013730.1,CP013731.1,CP013732.1	80	18145	3
Actinobacillus pleuropneumoniae serovar 7 str. AP76	AP76	ASM2040v1	CP001091.1,CP001093.1,CP001094.1,CP001092.1	48	18088	3
Bacillus subtilis	BS49	BS49Ch	LN649259.1	25	18056	3
Staphylococcus pseudintermedius	63228	ASM168566v2	CP015626.1	53	18043	3
Burkholderia pseudomallei	MSHR6755	ASM197508v1	CP017046.1,CP017047.1	92	18026	3
Acetobacter pasteurianus subsp. pasteurianus	SRCM101468	ASM220213v1	CP021922.1,CP021923.1,CP021924.1,CP021925.1	669	18023	3
Corynebacterium glutamicum	YI	ASM164303v1	CP014984.1	48	18021	3
Vibrio vulnificus	FORC_037	ASM220491v1	CP016321.1,CP016322.1,CP016323.1	116	18021	3
Campylobacter jejuni	CFSAN032806	ASM240712v1	CP023543.1,CP023544.1	27	18020	3
Helicobacter pylori XZ274	XZ274	ASM26265v1	CP003419.1,CP003420.1	24	17975	3
Psychrobacter urativorans	R10.10B	ASM129852v1	CP012678.1,CP012707.1,CP012708.1,CP012709.1,CP012710.1,CP012711.1	12	17964	3
Lactobacillus salivarius	NA	ASM90009461v1	LT604074.1,LT604075.1	31	17958	3
Cedecea neteri	M006	ASM75830v1	CP009458.1	31	17941	3
Escherichia marmotae	HT073016	ASM290036v1	CP025979.1,CP025980.1,CP025981.1	397	17937	3
Hafnia alvei	FDAARGOS_158	ASM155925v1	CP014031.1	30	17935	3
Salmonella enterica subsp. enterica serovar Infantis	FSIS1502916	ASM193157v1	CP016408.1,CP016409.1	57	17930	3
Enterobacter cloacae	AR_0163	ASM219235v1	CP021749.1,CP021750.1	71	17875	3
Dietzia timorensis	ID05-A0528	ASM165978v1	CP015961.1	41	17868	3
Brevibacillus laterosporus DSM 25	DSM 25	ASM270679v1	CP017705.1	74	17867	3
Nitrosococcus watsonii C-113	C-113	ASM14308v1	CP002086.1,CP002087.1,CP002088.1	51	17864	3
Cycloclasticus zancles 78-ME	78-ME	ASM44259v1	CP005996.1,CP006601.1	20	17859	3
Obesumbacterium proteus	DSM 2777	ASM158616v1	CP014608.1	61	17837	3
Lactobacillus johnsonii	UMNLJ21	ASM217685v1	CP021703.1,CP021701.1,CP021702.1	102	17807	3
Escherichia coli	H1	ASM190077v1	CP010160.1,CP010161.1,CP010162.1	105	17765	3
Escherichia coli	SMN013SH2	ASM286388v1	CP023673.1,CP023674.1,CP023675.1	290	17765	3
Escherichia coli	10671	ASM189034v1	CP018250.1,CP018251.1	188	17721	3
Enterobacter cloacae	704SK10	ASM221168v1	CP022148.1,CP022149.1,CP022150.1	88	17715	3
Enterococcus faecium	2014-VREF-41	ASM200762v1	CP019208.1,CP019209.1,CP019210.1,CP019211.1,CP019212.1	371	17699	3
Dokdonia donghaensis DSW-1	DSW-1	ASM165375v1	CP015125.1	36	17666	3
Escherichia coli	CFSAN004177	ASM172120v1	CP014670.1,CP012494.1,CP012496.1,CP012495.1	343	17665	3
Burkholderia pyrrocinia	DSM 10685	ASM102866v1	CP011503.1,CP011504.1,CP011505.1,CP011506.1	102	17634	3
Klebsiella pneumoniae	Kpn555	ASM166345v1	CP015130.1,CP015131.1,CP015133.1,CP015132.1	103	17634	3
Escherichia coli	C1	ASM190029v1	CP010116.1	56	17630	3
Sulfurimonas denitrificans DSM 1251	DSM 1251	ASM1296v1	CP000153.1	17	17627	3
Acinetobacter baumannii	KAB04	ASM180640v1	CP017648.1,CP017649.1	128	17624	3
Escherichia coli	NA	PRJEB14041	LT601384.1	118	17593	3
Salmonella enterica subsp. enterica serovar Newport	0307-213	ASM127831v1	CP012599.1	61	17577	3
Geobacillus lituanicus	N-3	ASM224360v1	CP017692.1,CP017693.1	208	17549	3
Burkholderia pseudomallei	MSHR5864	ASM197510v1	CP017048.1,CP017049.1	96	17542	3
Bradyrhizobium diazoefficiens	USDA 122	ASM190831v1	CP013127.1	130	17449	3
Pseudomonas sp. AK6U	AK6U	ASM284328v1	CP025229.1	64	17442	3
Escherichia coli VR50	VR50	ASM96851v1	CP011134.1,CP011135.1,CP011136.1,CP011137.1,CP011138.1,CP011139.1,CP011140.1,CP011141.1,CP011142.1,CP011143.1	172	17430	3
Bacillus anthracis	14RA5914	ASM227791v1	CP023001.1,CP023002.1,CP023003.1	30	17403	3
Haemophilus influenzae 10810	10810	ASM21087v1	FQ312006.1	38	17398	3
Komagataeibacter nataicola	RZS01	ASM200929v1	CP019875.1,CP019876.1,CP019877.1,CP019878.1,CP019879.1,CP019880.1,CP019881.1	373	17377	3
Escherichia coli	Ecol_542	ASM201202v1	CP018970.1,CP018969.1,CP018967.1,CP018966.1,CP018968.1	105	17369	3
Sphingobium herbicidovorans	MH	ASM208043v1	CP020538.1,CP020542.1,CP020539.1,CP020540.1,CP020541.1	97	17342	3
Tenacibaculum sp. LPB0136	LPB0136	ASM188904v1	CP018155.1	21	17331	3
Mycobacterium sp. KMS	KMS	ASM1540v1	CP000518.1,CP000519.1,CP000520.1	158	17330	3
Rhodococcus sp. p52	p52	ASM76332v2	CP016819.1,CP016821.1,CP016820.1,CP016822.1	67	17326	3
Magnetospirillum gryphiswaldense MSR-1 v2	MSR-1	MGMSRv2	HG794546.1	94	17309	3
Campylobacter jejuni subsp. jejuni R14	R14	ASM63243v1	CP005081.1	32	17274	3
Comamonas testosteroni TK102	TK102	ASM73937v1	CP006704.1	43	17229	3
Anoxybacillus flavithermus	DSM 2641T	ASM224370v1	CP020815.1	69	17169	3
Klebsiella oxytoca	AR_0147	ASM207265v1	CP020358.1,CP020359.1	111	17144	3
Vibrio anguillarum	CNEVA NB11008	ASM221202v1	CP022103.1,CP022104.1	155	17137	3
Streptococcus agalactiae	SG-M6	ASM219736v1	CP021869.1	36	17125	3
Vibrio anguillarum	87-9-116	ASM221150v1	CP021980.1,CP021981.1	160	17079	3
Mycobacterium abscessus	FLAC030	ASM167717v1	CP016191.1	39	17049	3
Nocardioides dokdonensis FR1436	FR1436	ASM165333v1	CP015079.1	27	17038	3
Burkholderia pseudomallei	14M0960418	ASM286006v1	CP019042.1,CP019043.1	108	17036	3
Streptococcus equi subsp. equi	ATCC 39506	ASM220229v1	CP021972.1	95	17029	3
Candidatus Sodalis pierantonius str. SOPE	SOPE	ASM51740v1	CP006568.1	730	17022	3
Herbaspirillum hiltneri N3	N3	ASM126792v1	CP011409.1	65	16999	3
Salmonella enterica subsp. enterica serovar Senftenberg	775W	ASM196942v1	CP016837.1,CP016838.1	60	16986	3
Salmonella enterica subsp. enterica serovar Senftenberg str. ATCC 43845	ATCC 43845	ASM48652v2	CP019194.1,CP019195.1	59	16983	3
Paraburkholderia sprentiae WSM5005	WSM5005	ASM186557v1	CP017561.1,CP017562.1,CP017563.1,CP017565.1,CP017564.1	125	16979	3
Escherichia coli	S50	ASM190140v1	CP010238.1,CP010239.1	132	16960	3
Acidovorax sp. T1	T1	ASM217681v1	CP021648.1,CP021649.1,CP021650.1,CP021651.1	153	16931	3
Klebsiella pneumoniae 342	342	ASM1956v1	CP000964.1,CP000965.1,CP000966.1	71	16929	3
Bacillus thuringiensis	ATCC 10792	ASM211944v1	CP021061.1,CP021062.1,CP021063.1,CP021064.1,CP021065.1,CP021066.1	206	16899	3
Bordetella pertussis	VA-18	ASM168654v1	CP015767.1	305	16876	3
Escherichia coli	9000	ASM189028v1	CP018252.1,CP018253.1	236	16872	3
Porphyromonas gingivalis ATCC 33277	ATCC 33277	ASM1050v1	AP009380.1	113	16861	3
Streptococcus thermophilus	MN-BM-A01	ASM128028v1	CP012588.1	54	16853	3
Oblitimonas alkaliphila	E1086	ASM126727v1	CP012363.1	32	16815	3
Acinetobacter baumannii	KAB03	ASM180638v1	CP017646.1,CP017647.1	103	16813	3
Acinetobacter baumannii	USA2	ASM208272v1	CP020592.1,CP020593.1	56	16813	3
Acinetobacter baumannii	Ab04-mff	ASM107765v1	CP012006.1,CP012007.1,CP012008.1	109	16812	3
Acinetobacter nosocomialis	SSA3	ASM208266v1	CP020588.1,CP020587.1	50	16812	3
Arthrobacter sp. U41	U41	ASM175014v1	CP015732.1,CP015733.1,CP015734.1,CP015735.1	134	16808	3
Escherichia coli	KSC207	ASM216395v1	CP019558.1,CP019559.1	67	16789	3
Bacillus thuringiensis Bt18247	Bt18247	ASM172116v1	CP015250.1,CP015253.1,CP015256.1,CP015252.1,CP015255.1,CP015251.1,CP015254.1	774	16788	3
Legionella pneumophila	Lpm7613	Lpm7613_v1	LT598657.1,LT598658.1	21	16767	3
Legionella pneumophila	F4468	ASM198947v1	CP014759.1	40	16767	3
Legionella pneumophila	D-7630	ASM165268v1	CP015344.1	42	16767	3
Legionella pneumophila	F4469	ASM196940v1	CP014760.1	40	16767	3
Legionella pneumophila	D-7631	ASM165266v1	CP015343.1	40	16767	3
Enterococcus faecium	6E6	ASM151873v1	CP013994.1,CP013995.1,CP013996.1	405	16755	3
Escherichia coli	S51	ASM166056v1	CP015995.1,CP015996.1,CP015997.1	96	16742	3
Pediococcus damnosus	TMW 2.1535	ASM161113v1	CP012288.1,CP012289.1,CP012290.1,CP012291.1,CP012292.1,CP012293.1	382	16741	3
Labrenzia sp. VG12	VG12	ASM223759v1	CP022529.1	14	16731	3
Haemophilus ducreyi	GHA9	ASM164791v1	CP015434.1	33	16709	3
Pseudomonas mesoacidophila	ATCC 31433	ASM209771v1	CP020737.1,CP020738.1,CP020739.1,CP020740.1	97	16704	3
Bordetella bronchiseptica RB50	RB50	ASM19567v1	BX470250.1	37	16699	3
Paenibacillus polymyxa	Sb3-1	ASM81966v1	CP010268.1,CP010270.1,CP010269.1	73	16691	3
Salmonella enterica subsp. enterica serovar Johannesburg str. ST203	ST203	ASM197540v1	CP019411.1	38	16691	3
Stenotrophomonas sp. KCTC 12332	YM1	ASM156221v1	CP014274.1	16	16673	3
Comamonas serinivorans	DSM 26136	ASM215886v1	CP021455.1	19	16669	3
Pseudomonas putida S12	S12	ASM49545v2	CP009974.1,CP009975.1	107	16657	3
Photobacterium damselae subsp. damselae	KC-Na-1	ASM214261v1	CP021151.1,CP021152.1,CP021153.1,CP021154.1,CP021155.1,CP021156.1	584	16651	3
Bacillus subtilis	TO-A JPC	ASM103798v1	CP011882.1	23	16645	3
Pseudodesulfovibrio profundus	500-1	DPRO_PRJEB22548_v1	LT907975.1,LT907976.1,LT907977.1	241	16633	3
Nonomuraea sp. ATCC 55076	ATCC 55076	ASM205745v1	CP017717.1	81	16627	3
Pediococcus pentosaceus	SRCM100892	ASM217353v1	CP021474.1,CP021471.1,CP021472.1,CP021473.1,CP021475.1,CP021476.1,CP021477.1	24	16624	3
Pelobacter acetylenicus	DSM 3246	ASM188816v1	CP015455.1,CP015456.1	45	16622	3
Paenibacillus donghaensis	KCTC 13049	ASM219241v1	CP021780.1	105	16618	3
Escherichia coli	Eco889	ASM166347v1	CP015159.1,CP015161.1,CP015160.1	104	16613	3
Mycobacterium rhodesiae NBB3	NBB3	ASM23089v3	CP003169.1	58	16598	3
Escherichia coli O157:H7 str. TW14359	TW14359	ASM2222v1	CP001368.1,CP001369.1	235	16597	3
Prochlorococcus sp. MIT 0604	MIT 0604	ASM75784v1	CP007753.1	2	16555	3
Escherichia coli	14EC033	ASM285406v1	CP024147.1,CP024148.1,CP024149.1,CP024150.1,CP024151.1,CP024152.1,CP024153.1,CP024154.1	513	16550	3
Oligotropha carboxidovorans OM4	OM4	ASM21858v1	CP002821.1,CP002822.1,CP002823.1	18	16528	3
Oligotropha carboxidovorans OM5	OM5	ASM21856v1	CP002826.1,CP002827.1,CP002828.1	8	16528	3
Xanthomonas citri pv. phaseoli var. fuscans	CFBP4885	ASM275935v1	CP020992.1,CP020993.1,CP020995.1,CP020994.1,CP020996.1,CP020997.1	344	16507	3
Escherichia coli O157:H7	FRIK2533	ASM165194v2	CP015842.1,CP022729.1	186	16496	3
Escherichia coli O157:H7	FRIK2455	ASM165196v2	CP015843.2,CP015845.2,CP015844.2	228	16496	3
Escherichia coli O157:H7	FRIK2069	ASM165192v2	CP015846.1,CP015847.2	228	16496	3
Borreliella burgdorferi	B31_NRZ	ASM215150v1	CP019767.1,CP019755.1,CP019756.1,CP019757.1,CP019758.1,CP019759.1,CP019760.1,CP019761.1,CP019762.1,CP019763.1,CP019764.1,CP019765.1,CP019766.1	64	16478	3
Klebsiella pneumoniae	BR	ASM166319v1	CP015990.1,CP015991.1	78	16477	3
Streptomyces lincolnensis	NRRL 2936	ASM168535v1	CP016438.1	26	16460	3
Acinetobacter baumannii	AF-401	ASM189600v1	CP018254.1,CP018255.1	105	16452	3
Borreliella burgdorferi	PAbe	ASM215148v1	CP019916.1,CP019917.1,CP019919.1,CP019920.1,CP019918.1,CP019921.1,CP019922.1,CP019923.1,CP019924.1,CP019925.1,CP019926.1	82	16437	3
Pseudomonas putida	1A00316	ASM151558v2	CP014343.1	32	16423	3
Paenibacillus larvae subsp. larvae	ATCC 9545	ASM200326v1	CP019687.1	147	16422	3
Gordonia sp. YC-JH1	YC-JH1	ASM284844v1	CP025435.1,CP025436.1	40	16403	3
Ralstonia solanacearum	RSCM	ASM289428v1	CP025985.1,CP025986.1	563	16396	3
Burkholderia mallei SAVP1	SAVP1	ASM1546v1	CP000526.1,CP000525.1	320	16376	3
Achromobacter xylosoxidans	MN001	ASM105105v1	CP012046.1	45	16365	3
Massilia putida	6NM-7T	ASM194182v1	CP019038.1,CP019036.1,CP019037.1	94	16323	3
Lactobacillus paracasei	IIA	ASM207928v1	CP014985.1,CP014986.1,CP014987.1,CP014988.1	268	16311	3
Nonlabens dokdonensis DSW-6	DSW-6	ASM33211v1	CP001397.1	37	16296	3
Xanthomonas citri pv. vignicola	CFBP7111	ASM221824v1	CP022263.1,CP022264.1,CP022266.1,CP022265.1	241	16288	3
Methylobacterium aquaticum	MA-22A	ASM154801v1	AP014704.1,AP014705.1,AP014706.1,AP014707.1,AP014708.1,AP014709.1	185	16264	3
Strawberry lethal yellows phytoplasma (CPA) str. NZSb11	NZSb11	ASM39718v1	CP002548.1	111	16264	3
Vibrio cholerae 2740-80	2740-80	ASM168341v1	CP016324.1,CP016325.1	114	16255	3
Haliangium ochraceum DSM 14365	DSM 14365	ASM2480v1	CP001804.1	120	16247	3
Caldithrix abyssi DSM 13497	LF13	ASM188681v1	CP018099.1	160	16234	3
Legionella pneumophila	D-7632	ASM165264v1	CP015342.1	40	16225	3
Bacillus cereus	JEM-2	ASM194192v1	CP018935.1,CP018936.1	44	16214	3
Lactococcus lactis subsp. lactis CV56	CV56	ASM19270v1	CP002365.1,CP002366.1,CP002367.1,CP002368.1,CP002369.1,CP002370.1	53	16189	3
Staphylococcus aureus subsp. aureus Tager 104	Tager 104	ASM45238v2	CP012409.1	37	16183	3
Vibrio owensii	051011B	ASM288765v1	CP025796.1,CP025797.1,CP025798.1	93	16172	3
Staphylococcus saprophyticus	FDAARGOS_355	ASM220926v1	CP022093.1,CP022091.1,CP022092.1,CP022094.1	78	16164	3
Haemophilus influenzae	NML-Hia-1	ASM185672v1	CP017811.1	28	16149	3
Legionella longbeachae	F1157CHC	ASM211384v1	CP020894.1,CP020895.1	85	16146	3
Chryseobacterium indologenes	AA5	ASM202566v1	CP018786.1	31	16113	3
Escherichia coli O55:H7 str. RM12579	RM12579	ASM24551v1	CP003109.1,CP003110.1,CP003111.1,CP003112.1,CP003113.1,CP003114.1	86	16083	3
Xylella fastidiosa 9a5c	9a5c	ASM672v1	AE003849.1,AE003850.3,AE003851.1	49	16082	3
Xylella fastidiosa	U24D	ASM145627v1	CP009790.1,CP009791.1	49	16081	3
Psychrobacter arcticus 273-4	273-4	ASM1230v1	CP000082.1	35	16069	3
Shewanella woodyi ATCC 51908	ATCC 51908	ASM1952v1	CP000961.1	77	16053	3
Paenibacillus polymyxa	J	ASM171904v1	CP015423.1	42	16036	3
Lactobacillus plantarum	LP2	ASM210942v1	CP020816.1	36	16030	3
Streptomyces venezuelae	ATCC 15439	Streptomyces_venezuelae_ATCC_15439	LN881739.1	33	16024	3
Gramella sp. LPB0144	LPB0144	ASM188900v1	CP018153.1	22	16023	3
Pseudomonas aeruginosa	F30658	ASM151626v1	CP008857.1	98	16013	3
Erysipelothrix rhusiopathiae str. Fujisawa	Fujisawa	ASM27008v1	AP012027.1	26	16010	3
Brucella sp. 141012304	141012304	BR141012304v1	LT605585.1,LT605586.1	49	15980	3
Enterococcus durans	BDGP3	ASM227793v1	CP022930.1,CP022931.1	41	15978	3
Weissella cibaria	CH2	ASM130814v2	CP012873.1,CP012874.1,CP012875.1,CP012876.1,CP012877.1,CP012878.1,CP012880.1	64	15971	3
Acidithiobacillus caldus SM-1	SM-1	ASM22102v1	CP002573.1,CP002574.1,CP002575.1,CP002576.1,CP002577.1	306	15959	3
Legionella pneumophila str. Paris	Paris	ASM4864v1	CR628336.1,CR628338.1	50	15943	3
Enterococcus faecium	ATCC 700221	ASM159434v1	CP014449.1,CP014450.1,CP014451.1,CP014452.1	261	15941	3
Lactobacillus zymae	ACA-DC 3411	ASM90018340v1	LT854705.1	213	15912	3
Mycobacterium sp. YC-RL4	YC-RL4	ASM164457v1	CP015596.1,CP015597.1	68	15869	3
Ralstonia solanacearum	YC40-M	ASM166341v1	CP015850.1,CP015851.1	278	15853	3
Salmonella enterica subsp. enterica serovar Kentucky str. SA20030505	SA20030505	ASM144848v2	CP022500.1,CP022501.1,CP022502.1	59	15846	3
Yersinia enterocolitica	YE165	ASM170857v1	CP016931.1,CP016932.1,CP016933.1	203	15838	3
Salmonella enterica subsp. enterica serovar Newport	0007-33	ASM192216v1	CP013685.1	33	15835	3
Lactobacillus plantarum subsp. plantarum	TS12	ASM190845v1	CP018324.1,CP018325.1,CP018326.1,CP018327.1,CP018328.1,CP018329.1,CP018330.1	69	15820	3
Borrelia miyamotoi	Izh-14	ASM274182v1	CP024371.1,CP024373.1,CP024385.1,CP024386.1,CP024387.1,CP024388.1,CP024375.1,CP024378.1,CP024379.1,CP024380.1,CP024381.1,CP024382.1,CP024383.1,CP024384.1,CP024377.1,CP024376.1,CP024374.1,CP024389.1,CP024372.1	92	15800	3
Pseudomonas aeruginosa	ATCC 27853	ASM161892v1	CP015117.1	46	15767	3
Campylobacter coli	BFR-CA-9557	ASM130571v1	CP011777.1	23	15765	3
Proteus vulgaris	FDAARGOS_366	ASM259115v1	CP023965.1	30	15762	3
Shewanella sp. Pdp11	Pdp11	ASM283816v1	CP015194.1	71	15759	3
Aeromonas veronii	AVNIH1	ASM163432v1	CP014774.1,CP014775.1	147	15750	3
Magnetococcus marinus MC-1	MC-1	ASM1486v1	CP000471.1	177	15742	3
Lactobacillus salivarius	CICC 23174	ASM172352v1	CP017107.1,CP017108.1,CP017109.1,CP017110.1	45	15741	3
Bacillus thuringiensis BMB171	BMB171	ASM9216v1	CP001903.1,CP001904.1	41	15740	3
Melissococcus plutonius DAT561	DAT561	ASM28397v1	AP012282.1,AP012283.1	14	15737	3
Escherichia coli	strain Z247	ASM214271v1	CP021207.1,CP021208.1,CP021209.1,CP021210.1	90	15724	3
Porphyromonas gingivalis	KCOM 2801	ASM275397v1	CP024600.1	89	15724	3
Roseomonas sp. FDAARGOS_362	FDAARGOS_362	ASM275481v1	CP024588.1,CP024584.1,CP024585.1,CP024582.1,CP024583.1,CP024587.1,CP024586.1,CP024589.1	417	15717	3
Shewanella pealeana ATCC 700345	ATCC 700345	ASM1828v1	CP000851.1	65	15717	3
Staphylococcus aureus	V521	ASM164102v1	CP013957.1,CP013958.1	63	15708	3
Methylobacterium zatmanii	PSBB041	ASM211781v1	CP021054.1,CP021055.1	40	15703	3
Acinetobacter baumannii	KAB01	ASM180634v1	CP017642.1,CP017643.1	73	15688	3
Escherichia coli O104:H4 str. C227-11	C227-11	ASM98676v1	CP011331.1,CP011332.1,CP011333.1,CP011334.1,CP011335.1,CP011336.1,CP011337.1,CP011338.1	184	15679	3
Helicobacter pylori PMSS1	PMSS1	ASM199109v1	CP018823.1,CP018824.1	26	15678	3
Helicobacter pylori SS1	SS1	ASM200552v1	CP009259.1,CP009260.1	27	15678	3
Streptococcus pyogenes	M23ND	ASM75648v1	CP008695.1	50	15637	3
Vibrio vulnificus NBRC 15645 = ATCC 27562	ATCC 27562	ASM222426v1	CP012882.1,CP012881.1	171	15635	3
Brevundimonas naejangsanensis	B1	ASM63591v2	CP015614.1	12	15622	3
Sphingobium sp. MI1205	MI1205	ASM156328v1	CP005188.1,CP005189.1,CP005190.1,CP005191.1,CP005192.1,CP005193.1	128	15607	3
Escherichia coli	319	ASM189032v1	CP018241.1,CP018242.1	188	15591	3
Lactobacillus plantarum	BDGP2	ASM229018v1	CP023174.1,CP023175.1,CP023176.1,CP023177.1,CP023178.1	59	15591	3
Escherichia coli O157:H7	4276	ASM175356v1	CP017442.1,CP017443.1	212	15584	3
Mycobacterium avium subsp. hominissuis	H87	ASM193621v1	CP018363.1	176	15582	3
Porphyromonas gingivalis	KCOM 3001	ASM275409v1	CP024595.1	72	15579	3
Vibrio campbellii	LA16-V1	ASM214265v1	CP021145.1,CP021146.1,CP021147.1,CP021148.1,CP021149.1,CP021150.1	160	15568	3
Rhodococcus ruber	YYL	ASM286390v1	CP024890.1,CP024892.1,CP024891.1	169	15562	3
Serratia marcescens	UMH2	ASM222051v1	CP018924.1	34	15560	3
Borrelia duttonii Ly	Ly	ASM1968v1	CP000976.1,CP000977.1,CP000978.1,CP000979.1,CP000980.1,CP000981.1,CP000982.1,CP000983.1,CP000984.1,CP000991.1,CP000992.1,CP000985.1,CP000986.1,CP000987.1,CP000988.1,CP000989.1,CP000990.1	124	15539	3
Paenibacillus kribbensis	AM49	ASM224041v1	CP020028.1	46	15539	3
Photorhabdus temperata subsp. thracensis	DSM 15199	ASM101028v1	CP011104.1	309	15528	3
Orientia tsutsugamushi str. Boryong	Boryong	ASM6354v1	AM494475.1	383	15525	3
Planococcus antarcticus DSM 14505	DSM 14505	ASM168756v2	CP016534.2,CP016535.2,CP016536.1	77	15511	3
Klebsiella pneumoniae	NU-CRE047	ASM281266v1	CP025037.1,CP025038.1,CP025039.1,CP025040.1,CP025041.1,CP025042.1	247	15497	3
Prevotella enoeca	F0113	ASM144444v1	CP013195.1	32	15493	3
Vulgatibacter incomptus	DSM 27710	ASM126317v1	CP012332.1	30	15492	3
Lactococcus lactis subsp. lactis	A12	A12	LT599049.1,LT599050.1,LT599051.1,LT599052.1,LT599053.1	60	15487	3
Helicobacter sp. MIT 01-6242	MIT 01-6242	ASM169333v1	CP016503.1	54	15484	3
Delftia tsuruhatensis	CM13	ASM175322v1	CP017420.1	58	15473	3
Lactobacillus heilongjiangensis	DSM 28069	ASM83164v3	CP012559.1	31	15439	3
Acinetobacter baumannii	AB34299	ASM200911v1	CP014291.1,CP014292.1,CP014293.1	83	15436	3
Zobellella denitrificans	F13-1	ASM240748v1	CP012621.1	47	15417	3
Escherichia coli	FORC_044	ASM222026v1	CP016755.1,CP018625.1,CP018626.1	200	15410	3
Colwellia beringensis	NB097-1	ASM207689v1	CP020465.1	53	15408	3
Alteromonas mediterranea DE1	AltDE1	ASM31008v1	CP003917.1,CP003918.1	48	15406	3
Alteromonas mediterranea UM7	UM7	ASM43957v1	CP004853.1,CP004854.1	45	15406	3
Escherichia coli	CDC#03-98	ASM224995v1	CP022689.1,CP022688.1	158	15391	3
Escherichia coli O157:H7	WS4202	ASM130721v1	CP012802.1,CP012803.1,CP012804.1	160	15391	3
Escherichia coli Xuzhou21	Xuzhou21	ASM26212v1	CP001925.1,CP001926.1,CP001927.1	170	15391	3
Orientia tsutsugamushi str. Ikeda	Ikeda	ASM1020v1	AP008981.1	389	15390	3
Escherichia coli O157:H7	8368	ASM175348v1	CP017444.1,CP017445.1	189	15383	3
Escherichia coli	13E0767	ASM205735v1	CP020107.1	88	15381	3
Escherichia coli	NADC 5570/86-24/6564	ASM180628v1	CP017251.1,CP017252.1	180	15380	3
Escherichia coli	NADC 5570/86-24/6565	ASM180626v1	CP017249.1,CP017250.1	180	15378	3
Escherichia coli	06-00048	ASM167747v1	CP015229.1,CP012498.1	165	15378	3
Achromobacter spanius	DSM 23806	ASM281270v1	CP025030.1	53	15368	3
Acinetobacter baumannii	SAA14	ASM208284v1	CP020579.1	60	15362	3
Escherichia coli	ECONIH2	ASM167514v1	CP014667.1,CP014668.1,CP014669.1	90	15360	3
Enterobacter cloacae	CAV1411	ASM102207v1	CP011581.1,CP011579.1,CP011580.1	60	15357	3
Clostridium acetobutylicum ATCC 824	ATCC 824	ASM876v1	AE001437.1,AE001438.3	29	15356	3
Clostridium acetobutylicum DSM 1731	DSM 1731	ASM21885v1	CP002660.1,CP002661.1,CP002662.1	29	15355	3
Clostridium acetobutylicum EA 2018	EA 2018	ASM19190v1	CP002118.1,CP002119.1	27	15346	3
Escherichia coli O157:H7	JEONG-1266	ASM155899v2	CP014314.1,CP015816.1	216	15314	3
Staphylococcus aureus O46	O46	ASM18945v3	CP025395.1	19	15310	3
Escherichia coli O157:H7 str. SS52	SS52	ASM80370v1	CP010304.1,CP010305.1	231	15309	3
Klebsiella pneumoniae subsp. pneumoniae KPNIH10	KPNIH10	ASM28143v2	CP007727.1,CP007728.1,CP007729.1,CP007730.1	152	15292	3
Klebsiella pneumoniae	AR_0129	ASM218029v1	CP021718.1,CP021713.1,CP021714.1,CP021715.1,CP021716.1,CP021717.1	93	15288	3
Klebsiella pneumoniae	KPNIH36	ASM167512v1	CP014647.1,CP014648.1,CP014649.1,CP014650.1	133	15287	3
Klebsiella pneumoniae subsp. pneumoniae KPNIH1	KPNIH1	ASM28153v2	CP008827.1,CP008828.1,CP008829.1,CP008830.1	150	15287	3
Klebsiella michiganensis	K516	ASM221683v1	CP022348.1,CP022349.1,CP022350.1,CP022351.1	124	15276	3
Xanthomonas oryzae pv. oryzicola	CFBP2286	ASM104273v1	CP011962.1,CP011963.1	383	15266	3
Bacillus amyloliquefaciens	SRCM101267	ASM217363v1	CP021505.1,CP021506.1	31	15240	3
Halomonas sp. 'Soap Lake #7'	Soap Lake #7	ASM200925v1	CP019915.1	38	15224	3
Escherichia coli O157:H7	9234	ASM175352v1	CP017446.1,CP017447.1	224	15216	3
Escherichia coli O157:H7	2149	ASM175346v1	CP017436.1,CP017437.1	219	15215	3
Escherichia coli O157:H7	2159	ASM175350v1	CP017438.1,CP017439.1	225	15215	3
Bacillus cereus	MLY1	ASM281387v1	CP024655.1,CP024657.1,CP024656.1,CP024658.1	190	15201	3
Acinetobacter baumannii	AB5075-UW	ASM96381v1	CP008706.1,CP008707.1,CP008708.1,CP008709.1	40	15198	3
Enterococcus faecium	VRE001	ASM189590v1	CP018071.1,CP018070.1,CP018072.1,CP018073.1	377	15162	3
Pseudomonas fluorescens	LBUM223	ASM96841v1	CP011117.1	150	15140	3
Geobacillus thermoleovorans	FJAT-2391	ASM171920v1	CP017071.1	104	15138	3
Pseudoalteromonas spongiae	SAO4-4	ASM281415v1	CP023398.1,CP023399.1,CP023400.1	45	15124	3
Corynebacterium stationis	LMG 21670	ASM202434v1	CP019963.1	16	15123	3
Burkholderia gladioli pv. gladioli	KACC 11889	ASM220817v1	CP022005.1,CP022006.1,CP022007.1,CP022008.1,CP022009.1	103	15118	3
Paucibacter sp. KCTC 42545	KCTC 42545	ASM147762v1	CP013692.1	76	15113	3
Escherichia coli	7784	ASM189030v1	CP018247.1,CP018248.1	179	15112	3
Escherichia coli O157:H7	1130	ASM175344v1	CP017434.1,CP017435.1	225	15112	3
Escherichia coli	ETEC-2264	ASM230233v1	CP023349.1,CP023350.1,CP023351.1,CP023352.1	158	15104	3
Escherichia coli O114:H49	90-9280	ASM274125v1	CP024240.1,CP024241.1,CP024242.1	144	15101	3
Mycobacterium chubuense NBB4	NBB4	ASM26690v1	CP003053.1,CP003054.1,CP003055.1	77	15082	3
Vibrio anguillarum	ATCC-68554	ASM229126v1	CP023208.1,CP023209.1,CP023210.1	211	15078	3
Lactobacillus kunkeei	MP2	ASM131494v1	CP012920.1	38	15070	3
Burkholderia mallei NCTC 10247	NCTC 10247	ASM1562v1	CP000548.1,CP000547.1	349	15060	3
Labilithrix luteola	DSM 27648	ASM126320v1	CP012333.1	24	15060	3
Escherichia coli	KSC64	ASM216369v1	CP018840.1	74	15056	3
Vibrio alginolyticus	ATCC 33787	ASM146973v1	CP013484.1,CP013485.1,CP013486.1,CP013487.1,CP013488.1	98	15052	3
Legionella pneumophila	E4_N	ASM175330v1	CP015950.1	26	15051	3
Legionella pneumophila	E1_P	ASM175314v1	CP015946.1	28	15049	3
Escherichia coli	HB-Coli0	ASM211671v1	CP020933.1,CP020934.1,CP020935.1,CP020936.1	113	15002	3
Spiroplasma citri	R8-A2	ASM188685v1	CP013197.1,CP013199.1,CP013198.1	399	14989	3
Escherichia coli	IMT16316	ASM258700v1	CP023815.1,CP023816.1	95	14980	3
Xanthomonas citri pv. phaseoli var. fuscans	CFBP6991	ASM275939v1	CP021015.1,CP021017.1,CP021016.1	48	14972	3
Yersinia ruckeri	QMA0440	ASM219259v1	CP017236.1	51	14960	3
Acinetobacter baumannii	KBN10P02143	ASM151437v1	CP013924.1,CP013925.1	97	14957	3
Comamonas kerstersii	8943	ASM205672v1	CP020121.1	44	14952	3
Escherichia coli str. K-12 substr. MG1655	K-12	ASM154463v1	CP014225.1	77	14942	3
Vibrio vulnificus	ATL 6-1306	ASM155851v1	CP014048.1,CP014049.1	146	14939	3
Ralstonia solanacearum	UW163	ASM158713v1	CP012939.1,CP012941.1,CP012942.1,CP012940.1	165	14936	3
Xanthomonas citri pv. phaseoli var. fuscans	CFBP6165	ASM275921v1	CP020998.1,CP020999.1,CP021000.1	181	14934	3
Microbacterium chocolatum	SIT 101	ASM165246v1	CP015810.1,CP015811.1,CP015812.1,CP015813.1	68	14932	3
Escherichia coli	MRE600	ASM154267v2	CP014197.1,CP014198.2,CP014199.1,CP014200.1	437	14929	3
Clostridium butyricum	CDC_51208	ASM188687v1	CP013239.1,CP013240.1,CP013238.1	82	14925	3
Cronobacter sakazakii	ATCC 29544	ASM98282v1	CP011047.1,CP011048.1,CP011049.1,CP011050.1	156	14907	3
Klebsiella pneumoniae	NA	ASM190233v1	CP018337.1,CP018339.1,CP018338.1,CP018340.1,CP018341.1,CP018342.1,CP018343.1	153	14906	3
Borrelia miyamotoi	Izh-4	ASM274184v1	CP024390.1,CP024392.1,CP024403.1,CP024404.1,CP024405.1,CP024406.1,CP024394.1,CP024395.1,CP024396.1,CP024398.1,CP024399.1,CP024400.1,CP024401.1,CP024402.1,CP024397.1,CP024393.1,CP024407.1,CP024391.1	106	14888	3
Klebsiella pneumoniae	KP5	ASM185531v1	CP012426.1,CP012427.1,CP012428.1,CP012429.1,CP011839.1	77	14854	3
Flavobacterium columnare	94-081	ASM153464v1	CP013992.1	120	14833	3
Haemophilus parasuis	CL120103	ASM205556v1	CP020085.1	127	14830	3
Acidovorax citrulli	KACC17005	ASM244197v1	CP023687.1	111	14810	3
Shigella flexneri 2003036	2003036	ASM74395v1	CP004056.1	345	14809	3
Lactobacillus alimentarius DSM 20249	DSM 20249	ASM284989v1	CP018867.1,CP018868.1	35	14808	3
Shigella flexneri 4c	1602	ASM224007v1	CP020336.1,CP020337.1,CP020338.1	736	14808	3
Shigella flexneri 1a	670	ASM224013v1	CP020086.1,CP020087.1,CP020088.1	727	14807	3
Shigella flexneri 1a	439	ASM224011v1	CP020342.1,CP020343.1,CP020344.1	722	14807	3
Shigella flexneri 2002017	2002017	ASM2224v1	CP001383.1,CP001384.1,CP001385.1,CP001386.1,CP001387.1,CP001388.1	718	14807	3
Shigella flexneri 2a	981	ASM158017v1	CP012137.1,CP012138.1,CP012139.1	767	14807	3
Shigella flexneri Shi06HN006	Shi06HN006	ASM74399v1	CP004057.1	337	14807	3
Shigella flexneri 2a str. 301	301	ASM692v2	AE005674.2,AF386526.1	739	14806	3
Shigella flexneri 4c	1205	ASM157996v1	CP012140.1,CP012141.1,CP012142.1,CP012143.1	813	14806	3
Shigella flexneri G1663	G1663	ASM102185v1	CP007037.1,CP007038.1	686	14806	3
Shigella flexneri 4c	702	ASM224009v1	CP020339.1,CP020340.1,CP020341.1	383	14805	3
Streptococcus pneumoniae	NT_110_58	ASM81700v1	CP007593.1	103	14804	3
Xanthomonas oryzae pv. oryzae	PXO211	ASM174663v1	CP013674.1	622	14796	3
Vibrio gazogenes	ATCC 43942	ASM219651v1	CP018835.1,CP018836.1,CP018837.1	134	14784	3
Lysobacter capsici	55	ASM144278v1	CP011130.1	27	14781	3
Vibrio alginolyticus	K09K1	ASM214906v1	CP017918.1,CP017919.1	82	14780	3
Escherichia coli	272	ASM189022v1	CP018239.1,CP018240.1	182	14778	3
Bartonella grahamii as4aup	as4aup	ASM2272v1	CP001562.1,CP001563.1	83	14759	3
Vibrio parahaemolyticus	MAVP-Q	ASM168217v1	CP011884.1,CP011885.1	74	14745	3
Vibrio parahaemolyticus	MAVP-Q	ASM220972v2	CP022473.1,CP022472.1	74	14745	3
Methylomonas denitrificans	FJG1	ASM78570v2	CP014476.1	90	14736	3
Klebsiella michiganensis	K518	ASM229028v1	CP023185.1,CP023186.1,CP023187.1,CP023188.1	121	14728	3
Clostridium beijerinckii	NCIMB 14988	ASM83310v2	CP010086.2	88	14722	3
Shigella flexneri 5 str. 8401	8401	ASM1358v1	CP000266.1	310	14722	3
Mycoplasma gallisepticum str. R(high)	R(high)	ASM2536v1	CP001872.1	30	14710	3
Mycoplasma gallisepticum str. R(low)	R	ASM9258v1	AE015450.2	30	14704	3
Clostridium cellulolyticum H10	H10; ATCC 35319	ASM2206v1	CP001348.1	124	14646	3
Ruminiclostridium sp. KB18	KB18	ASM168870v2	CP015400.2	99	14643	3
Providencia rettgeri	RB151	ASM187462v1	CP017671.1,CP017672.1	69	14638	3
Streptomyces griseochromogenes	ATCC 14511	ASM154262v2	CP016279.1	92	14634	3
Klebsiella pneumoniae subsp. pneumoniae	NUHL24835	ASM152189v1	CP014004.1,CP014005.1,CP014006.1	56	14628	3
Legionella pneumophila subsp. pneumophila	FFI105	ASM176633v1	CP016873.1	37	14620	3
Legionella pneumophila subsp. pneumophila	FFI104	ASM176631v1	CP016872.1	36	14620	3
Legionella pneumophila subsp. pneumophila	FFI337	ASM176637v1	CP016876.1	37	14620	3
Bordetella pertussis	VA-15	ASM168652v1	CP015766.1	308	14612	3
Pseudomonas aeruginosa	PA8281	ASM179285v1	CP015002.1	47	14596	3
Helicobacter pylori SouthAfrica7	SouthAfrica7	ASM18524v1	CP002336.1,CP002337.1	33	14586	3
Burkholderia multivorans	AU1185	ASM171875v1	CP013430.1,CP013431.1,CP013432.1	137	14583	3
Klebsiella pneumoniae	CRKP-1215	ASM278675v1	CP024838.1,CP024839.1,CP024840.1,CP024841.1	101	14574	3
Sinorhizobium meliloti	B401	ASM230235v1	CP019485.1,CP019483.1,CP019484.1	118	14564	3
Pseudomonas resinovorans NBRC 106553	NBRC 106553	ASM41269v1	AP013068.1,AP013069.1	75	14546	3
Xanthomonas citri pv. phaseoli var. fuscans	CFBP7767	ASM275937v1	CP021012.1,CP021013.1,CP021014.1	326	14527	3
Burkholderia cenocepacia	895	ASM160613v1	CP015036.1,CP015037.1,CP015038.1	228	14526	3
Bifidobacterium animalis	A6	ASM81704v1	CP010433.1	13	14523	3
Komagataeibacter xylinus E25	E25	ASM55076v1	CP004360.1,CP004361.1,CP004362.1,CP004363.1,CP004364.1,CP004365.1	204	14523	3
Arachidicoccus sp. BS20	BS20	ASM165970v1	CP015971.1	30	14521	3
Candidatus Amoebophilus asiaticus 5a2	5a2	ASM2056v1	CP001102.1	151	14520	3
Mycobacterium liflandii 128FXT	128FXT	ASM2644v2	CP003899.1,EU271968.1	503	14519	3
Shigella flexneri 7b	94-3007	ASM274163v1	CP024473.1,CP024474.1,CP024475.1,CP024476.1	732	14511	3
Bacillus paralicheniformis	14DA11	ASM239322v1	CP023168.1	31	14483	3
Bacillus subtilis	KH2	ASM189040v1	CP018184.1,CP018185.1	95	14483	3
Clostridium botulinum	BrDura	ASM286604v1	CP014151.1,CP014152.1	27	14483	3
Escherichia coli	FMU073332	ASM188807v1	CP017844.1,CP017848.1,CP017845.1,CP017846.1,CP017847.1	300	14474	3
Candidatus Phytoplasma australiense	NA	ASM6992v1	AM422018.1	88	14433	3
Vibrio parahaemolyticus	ATCC 17802	ASM155849v1	CP014046.1,CP014047.1	87	14419	3
Borrelia miyamotoi	Izh-5	ASM274166v1	CP024205.1,CP024207.1,CP024218.1,CP024219.1,CP024220.1,CP024221.1,CP024209.1,CP024210.1,CP024211.1,CP024212.1,CP024213.1,CP024214.1,CP024215.1,CP024217.1,CP024216.1,CP024208.1,CP024222.1,CP024206.1	91	14408	3
Pediococcus acidilactici	SRCM100313	ASM217359v1	CP021487.1,CP021488.1,CP021489.1	26	14391	3
Pantoea ananatis	R100	ASM154305v1	CP014207.1,CP014208.1	35	14385	3
Lysinibacillus sphaericus	III(3)7	ASM159807v1	CP014856.1,CP014857.1	57	14377	3
Azospirillum brasilense	Sp 7	ASM131501v1	CP012914.1,CP012915.1,CP012916.1,CP012917.1,CP012918.1,CP012919.1	103	14372	3
Methylobacterium nodulans ORS 2060	ORS 2060	ASM2208v1	CP001349.1,CP001350.1,CP001351.1,CP001352.1,CP001353.1,CP001354.1,CP001355.1,CP001356.1	625	14371	3
Bifidobacterium animalis subsp. lactis KLDS2.0603	KLDS2.0603	ASM81620v1	CP007522.1	9	14355	3
Sphingobium yanoikuyae	S72	ASM250408v1	CP023741.1	45	14335	3
Bordetella pertussis	VA-010	ASM168660v1	CP015770.1	303	14321	3
Bosea vaviloviae	Vaf18	ASM174186v1	CP017147.1,CP017148.1	55	14317	3
Pseudomonas sp. LPH1	LPH1	ASM203756v1	CP017290.1	16	14295	3
Escherichia coli O55:H7 str. CB9615	CB9615	ASM2516v1	CP001846.1,CP001847.1	105	14286	3
Mycoplasma gallisepticum NC96_1596-4-2P	NC96_1596-4-2P	ASM28671v1	CP003508.1	25	14286	3
Pseudomonas aeruginosa	PA83	ASM221534v1	CP017293.1,CP017294.1	78	14278	3
Mycoplasma gallisepticum NC95_13295-2-2P	NC95_13295-2-2P	ASM28669v1	CP003507.1	21	14271	3
Bacteroides dorei CL03T12C01	CL03T12C01	ASM164086v1	CP011531.1	40	14259	3
Porphyromonas gingivalis	KCOM 2805	ASM275407v1	CP024594.1	117	14247	3
Burkholderia mallei	2002734306	ASM95948v1	CP009707.1,CP009708.1	319	14236	3
Acidiphilium multivorum AIU301	AIU301	ASM20283v1	AP012035.1,AP012036.1,AP012037.1,AP012038.1,AP012039.1,AP012040.1,AP012041.1,AP012042.1,AP012043.1	354	14228	3
Salmonella enterica subsp. enterica serovar Weltevreden	2511STDY5712385	99_3134	LN890524.1,LN890525.1,LN890526.1	72	14215	3
Salmonella enterica subsp. enterica serovar Weltevreden str. 1655	1655	ASM161251v1	CP014996.1,CP014997.1	105	14213	3
Acinetobacter baumannii	LAC4	ASM190829v1	CP018677.1,CP018678.1,CP018679.1	117	14203	3
Xanthomonas phaseoli pv. phaseoli	CFBP6982	ASM275915v1	CP020975.1,CP020976.1,CP020977.1,CP020978.1	497	14197	3
Gordonia phthalatica	QH-11	ASM130567v1	CP011853.1	33	14170	3
Pseudomonas cremoricolorata	ND07	ASM75953v1	CP009455.1	32	14160	3
Pseudonocardia sp. EC080610-09	EC080610-09	ASM142097v1	CP012181.1,CP012182.1,CP012183.1	109	14142	3
Escherichia coli	NA	Unitig	LT883139.1,LT883140.1,LT883141.1,LT883142.1	240	14128	3
Streptomyces glaucescens	GLA.O	ASM76121v1	CP009438.1,CP009439.1	24	14128	3
Bartonella bacilliformis KC583	KC583; ATCC 35685	ASM1544v1	CP000524.1	22	14126	3
Azoarcus sp. SY39	SY39	ASM287247v1	CP025682.1	42	14107	3
Flavonifractor plautii	YL31	ASM168862v2	CP015406.2	55	14102	3
Pseudomonas frederiksbergensis	ERDD5:01	ASM187464v1	CP017886.1,CP017887.1	85	14069	3
Lactobacillus brevis	100D8	ASM213839v1	CP015338.1,CP015339.1,CP015340.1,CP015341.1	92	14048	3
Escherichia coli	CV839-15	ASM280380v2	CP024978.1,CP024975.1,CP024976.1,CP024977.1	720	14038	3
Arthrobacter sp. ERGS1:01	ERGS1:01	ASM128131v1	CP012479.1,CP012478.1,CP012477.1	77	14032	3
Aeromonas media WS	WS	ASM28721v3	CP007567.1,CP007568.1	348	14027	3
Chryseobacterium sp. IHB B 17019	IHB B 17019	ASM145615v1	CP013293.1,CP013294.1	23	14022	3
Klebsiella pneumoniae	FDAARGOS_439	ASM259107v1	CP023913.1,CP023918.1,CP023917.1,CP023916.1,CP023914.1,CP023915.1	176	14021	3
Corynebacterium callunae DSM 20147	DSM 20147	ASM34478v1	CP004354.1,CP004355.1,CP004356.1	22	14010	3
Akkermansia muciniphila	YL44	ASM168876v2	CP015409.2	21	13985	3
Pseudoalteromonas piratica	OCN003	ASM78839v1	CP009888.1,CP009889.1	25	13982	3
Legionella pneumophila	C7_O	ASM175296v1	CP015938.1	25	13977	3
Legionella pneumophila subsp. fraseri	Detroit-1	ASM188679v1	CP017457.1	30	13973	3
Streptococcus gallolyticus	ICDDRB-NRC-S1	ASM147757v1	CP013688.1	67	13967	3
Pseudomonas aeruginosa	BAMCPA07-48	ASM163224v1	CP015377.1	90	13964	3
Salmonella enterica subsp. enterica serovar Sloterdijk str. ATCC 15791	ATCC 15791	ASM48644v2	CP012349.1	49	13962	3
Caulobacter mirabilis	FWC 38	ASM274961v1	CP024201.1	15	13939	3
Bacillus velezensis	L-1	ASM268852v1	CP023859.1	32	13921	3
Sulfurospirillum cavolei	UCH003	ASM154805v1	AP014724.1	30	13919	3
Lactobacillus paracasei	L9	ASM124439v1	CP012148.1	90	13896	3
Campylobacter coli	BP3183	ASM186549v1	CP017871.1,CP017872.1	4	13893	3
Borrelia burgdorferi B31	B31	ASM868v2	AE000783.1,AE000792.1,AE001575.1,AE001576.1,AE001577.1,AE001578.1,AE001579.1,AE001580.1,AE001581.1,AE000791.1,AE000793.2,AE001582.2,AE000785.1,AE000794.2,AE000786.1,AE000784.1,AE000789.1,AE000788.1,AE000787.1,AE001583.1,AE000790.2,AE001584.1	94	13881	3
Borreliella burgdorferi	PAli	ASM215146v1	CP019844.1,CP019845.1,CP019846.1,CP019847.1,CP019848.1,CP019849.1,CP019850.1,CP019851.1,CP019852.1,CP019853.1,CP019854.1,CP019855.1	42	13881	3
Xanthomonas citri pv. mangiferaeindicae	XC01	ASM224039v1	CP016836.1	12	13871	3
Escherichia coli	MDR_56	ASM200931v1	CP019903.1,CP019908.1,CP019904.1,CP019907.1,CP019909.1,CP019910.1,CP019906.1,CP019905.1	299	13869	3
Pseudomonas putida	AA7	ASM202570v1	CP018846.1	53	13815	3
Proteus mirabilis	AR_0155	ASM218023v1	CP021694.1,CP021695.1	103	13809	3
Shewanella denitrificans OS217	OS217	ASM1376v1	CP000302.1	106	13795	3
Escherichia coli	09-00049	ASM167749v1	CP015228.1,CP012500.1	163	13791	3
Desulfatibacillum alkenivorans AK-01	AK-01	ASM2190v1	CP001322.1	78	13756	3
Sphingomonas sp. LK11	LK11	ASM197160v1	CP013916.1,CP013918.1,CP013917.1	42	13713	3
Klebsiella pneumoniae	CAV1217	ASM190871v1	CP018676.1,CP018674.1,CP018672.1,CP018675.1,CP018673.1	103	13712	3
Neisseria sp. 10022	10022	ASM232708v1	CP023429.1	84	13706	3
Yersinia pestis 8787	8787	ASM118875v1	CP006748.1,CP006747.1,CP006746.1	301	13704	3
Klebsiella oxytoca KONIH1	KONIH1	ASM71465v1	CP008788.1,CP008789.1,CP008790.1,CP008791.1	162	13703	3
Paracoccus yeei	FDAARGOS_252	ASM207363v1	CP020442.1,CP020441.1,CP020440.1,CP020443.1,CP020444.1,CP020445.1,CP020446.1,CP020447.1	346	13697	3
Xanthomonas phaseoli pv. phaseoli	CFBP412	ASM275909v1	CP020964.1,CP020965.1,CP020966.1	332	13679	3
Chryseobacterium sp. T16E-39	T16E-39	ASM221606v1	CP022282.1	8	13677	3
Escherichia coli S88	S88	ASM2628v2	CU928161.2,CU928146.1	74	13677	3
Morganella morganii	FDAARGOS_172	ASM155889v1	CP014026.1	35	13676	3
Bacillus thuringiensis	L-7601	ASM202510v1	CP020002.1,CP020003.1,CP020004.1,CP020005.1	90	13674	3
Yersinia pseudotuberculosis	ATCC 6904	ASM75031v1	CP008943.1	75	13672	3
Pandoraea apista	AU2161	ASM102726v1	CP011501.1	21	13649	3
Vibrio anguillarum	VIB43	ASM228754v1	CP023054.1,CP023055.1,CP023056.1	404	13639	3
Xanthomonas oryzae pv. oryzae	PXO563	ASM174671v1	CP013678.1	634	13617	3
Acidovorax sp. JS42	JS42	ASM1554v1	CP000539.1,CP000540.1,CP000541.1	146	13568	3
Lactobacillus ginsenosidimutans	EMML 3041	ASM105047v1	CP012034.1	28	13560	3
Klebsiella pneumoniae	KPN1481	ASM215676v1	CP020847.1,CP020848.1,CP020851.1,CP020852.1,CP020850.1,CP020849.1	101	13549	3
Pelobacter propionicus DSM 2379	DSM 2379	ASM1504v1	CP000482.1,CP000483.1,CP000484.1	84	13546	3
Erysipelotrichaceae bacterium I46	I46	ASM168896v2	CP015404.2	99	13537	3
Thermoanaerobacterium thermosaccharolyticum	TG57	ASM225007v1	CP016893.1	66	13529	3
Elizabethkingia anophelis NUHP1	NUHP1	ASM49593v2	CP007547.1	30	13523	3
Streptomyces sp. CLI2509	CLI2905	ASM228807v1	CP021118.1,CP021119.1	22	13491	3
Bordetella pertussis	VA-190	ASM168636v1	CP015761.1	304	13481	3
Mycobacterium tuberculosis	MTB1	ASM207277v2	CP020381.2	75	13481	3
Sodalis glossinidius str. 'morsitans'	morsitans	ASM1008v1	AP008232.1,AP008233.1,AP008234.1,AP008235.1	234	13475	3
Escherichia coli	DH5alpha	ASM284822v1	CP025520.1	81	13456	3
Cyanothece sp. PCC 7822	PCC 7822	ASM14733v1	CP002198.1,CP002199.1,CP002200.1,CP002201.1,CP002202.1,CP002203.1,CP002204.1	127	13446	3
Arthrobacter sp. PAMC 25486	PAMC 25486	ASM78553v1	CP007595.1	32	13414	3
Bacillus clausii	DSM 8716	ASM225011v1	CP019985.1	58	13409	3
Escherichia coli str. K-12 substr. MG1655	JW5437-1	ASM156633v1	CP014348.1	74	13406	3
Eggerthella sp. YY7918	YY7918	ASM27028v1	AP012211.1	8	13403	3
Pseudomonas aeruginosa	Pa127	ASM220535v1	CP022000.1	97	13402	3
Vibrio rotiferianus	B64D1	ASM221439v1	CP018311.1,CP018312.1	77	13392	3
Cobetia marina	JCM 21022	ASM172048v1	CP017114.1	17	13379	3
Xanthomonas phaseoli pv. phaseoli	CFBP6164	ASM275911v1	CP020967.1,CP020968.1,CP020969.1,CP020970.1	582	13374	3
Klebsiella oxytoca	CAV1335	ASM102211v1	CP011618.1,CP011617.1,CP011616.1,CP011613.1,CP011614.1,CP011615.1	164	13370	3
Klebsiella oxytoca	CAV1099	ASM102229v1	CP011597.1,CP011594.1,CP011596.1,CP011592.1,CP011593.1,CP011595.1	116	13370	3
Staphylococcus aureus	Seattle 1945	ASM220209v1	CP021907.1,CP021908.1	40	13365	3
Enterococcus faecium	ISMMS_VRE_1	ASM172094v1	CP012430.1,CP012432.1,CP012431.1,CP012435.1,CP012434.1,CP012433.1	270	13358	3
Pseudomonas psychrotolerans	PRS08-11306	ASM191313v1	CP018758.1,CP018759.1	31	13358	3
Acetobacter pasteurianus subsp. ascendens	SRCM101447	ASM217377v1	CP021524.1,CP021525.1,CP021526.1,CP021527.1	75	13350	3
Lactococcus lactis subsp. lactis	UC06	ASM207897v1	CP015902.1,CP016734.1,CP016735.1,CP016736.1	74	13340	3
Lactobacillus plantarum	LZ227	ASM166002v1	CP015857.1,CP015858.1,CP015860.1,CP015861.1,CP015859.1,CP015862.1	270	13338	3
Mycobacterium abscessus subsp. massiliense	FLAC047	ASM214003v1	CP021122.1	20	13338	3
Prevotella intermedia	KCOM 1741	ASM276395v1	CP024732.1,CP024733.1	58	13338	3
Vibrio shilonii	QT6D1	ASM221434v1	CP018308.1,CP018309.1,CP018310.1	63	13321	3
Escherichia coli	FDAARGOS_403	ASM239336v1	CP023535.1,CP023534.1,CP023533.1,CP023532.1	198	13319	3
Clostridium kluyveri	JZZ	ASM190229v1	CP018335.1,CP018336.1	146	13304	3
Bacillus thuringiensis	MYBT18246	ASM168556v1	CP015350.1,CP015356.1,CP015355.1,CP015354.1,CP015353.1,CP015352.1,CP015360.1,CP015351.1,CP015359.1,CP015358.1,CP015357.1,CP015361.1	1031	13300	3
Xanthomonas oryzae pv. oryzae	PXO602	ASM174673v1	CP013679.1	611	13294	3
Escherichia coli	Ecol_AZ155	ASM201212v1	CP019005.1,CP019002.1,CP019003.1,CP019004.1,CP019001.1	170	13293	3
Planococcus halocryophilus	DSM 24743	ASM168758v2	CP016537.2	28	13281	3
Mycobacterium ulcerans subsp. shinshuense	ATCC 33728	ASM235577v1	AP017624.1,AP017625.1	460	13277	3
Paracoccus aminophilus JCM 7686	JCM 7686	ASM44499v1	CP006650.1,CP006651.1,CP006652.1,CP006653.1,CP006654.1,CP006655.1	90	13267	3
Mycobacterium ulcerans Agy99	Agy99	ASM1392v2	CP000325.1,BX649209.1	586	13257	3
Escherichia coli	ExPEC XM	ASM284468v1	CP025328.1,CP025329.1	98	13213	3
Burkholderia pseudomallei MSHR2543	MSHR2543	ASM95922v1	CP009478.1,CP009477.1	111	13212	3
Escherichia coli	CD306	ASM151361v1	CP013831.1,CP013832.1	110	13210	3
Escherichia coli	Ecol_656	ASM201206v1	CP018979.1,CP018978.1,CP018977.1	113	13210	3
Aeromonas aquatica	MX16A	ASM189596v1	CP018201.1	50	13180	3
Streptococcus suis BM407	BM407	ASM2674v1	FM252032.1,FM252033.1	45	13180	3
Staphylococcus lugdunensis	Klug93G-4	ASM225009v2	CP017069.2	17	13177	3
Mycoplasma canis	LV	ASM98806v1	CP011368.1	36	13135	3
Rhodococcus fascians D188	D188	ASM162030v1	CP015235.1,CP015236.1,CP015237.1	39	13131	3
Acinetobacter baumannii	ABNIH28	ASM290288v1	CP026125.1,CP026128.1,CP026129.1,CP026126.1,CP026127.1	166	13126	3
Acetobacterium woodii DSM 1030	DSM 1030	ASM24760v1	CP002987.1	48	13123	3
Legionella pneumophila	ST62	2532STDY5467631	LT632614.1	43	13123	3
Acinetobacter sp. TGL-Y2	TGL-Y2	ASM161255v1	CP015110.1,CP015111.1,CP015112.1	126	13121	3
Acinetobacter baumannii	ATCC 17978	ASM159342v2	CP018664.1	32	13107	3
Acinetobacter baumannii	AB042	ASM194176v1	CP019034.1	32	13107	3
Ralstonia solanacearum FJAT-1458	FJAT-1458	ASM188753v1	CP016554.1,CP016555.1	253	13106	3
Acinetobacter baumannii	ATCC 17978-mff	ASM107767v1	CP012004.1,CP012005.1	36	13105	3
Myroides sp. A21	A21	ASM80722v1	CP010327.1	74	13104	3
Rhodococcus sp. PBTS 2	PBTS 2	ASM162000v1	CP015220.1,CP015221.1	30	13103	3
Pseudomonas syringae pv. actinidiae	NZ-45	ASM191321v1	CP017007.1,CP017008.1	489	13099	3
Rhizobium etli bv. mimosae str. Mim1	Mim1	ASM44243v1	CP005950.1,CP005951.1,CP005952.1,CP005954.1,CP005955.1,CP005956.1,CP005953.1	138	13091	3
Legionella pneumophila str. Lens	Lens	ASM4866v1	CR628337.1,CR628339.1	35	13067	3
Cyanothece sp. PCC 8802	PCC 8802	ASM2404v1	CP001701.1,CP001702.1,CP001703.1,CP001704.1,CP001705.1	72	13061	3
Arthrobacter alpinus	ERGS4:06	ASM144557v1	CP013200.1,CP013201.1	43	13050	3
Ehrlichia muris AS145	AS145	ASM50822v1	CP006917.1	53	13046	3
Lactobacillus delbrueckii subsp. bulgaricus	ND04	ASM200088v1	CP016393.1	54	13045	3
Desulfovibrio vulgaris DP4	DP4	ASM1548v1	CP000527.1,CP000528.1	23	13033	3
Mycobacterium chimaera	DSM 44623	ASM221928v1	CP015278.1,CP015279.1,CP015280.1	81	13026	3
Pseudomonas trivialis	IHBB745	ASM118633v1	CP011507.1	17	13026	3
Acinetobacter baumannii	KAB02	ASM180636v1	CP017644.1,CP017645.1	60	13021	3
Rhizobium leguminosarum bv. viciae	BIHB 1217	ASM224336v1	CP022665.1,CP022666.1,CP022667.1,CP022668.1,CP022669.1,CP022670.1,CP022671.1	108	13020	3
Lactobacillus rhamnosus	4B15	ASM215892v1	CP021426.1	67	13000	3
Xanthobacter autotrophicus Py2	Py2	ASM1764v1	CP000781.1,CP000782.1	59	12994	3
Legionella pneumophila str. Corby	Corby	ASM9254v1	CP000675.2	49	12987	3
Flavobacterium columnare ATCC 49512	ATCC 49512	ASM24007v2	CP003222.2	91	12972	3
Corynebacterium casei LMG S-19264	LMG S-19264	ASM55078v1	CP004350.1,CP004351.1,CP004352.1	58	12968	3
Vibrio vulnificus	FORC_036	ASM211720v1	CP015512.1,CP015513.1,CP015514.1	93	12965	3
Vibrio anguillarum	NB10	Vibrio_anguillarum_NB10_serovar_O1	LK021130.1,LK021129.1,LK021128.1	234	12939	3
Rhodobacter sphaeroides	MBTLJ-13	ASM168562v1	CP015210.1,CP015211.1,CP015212.1,CP015213.1,CP015214.1,CP015215.1,CP015216.1	64	12935	3
Klebsiella pneumoniae	KP38731	ASM200907v1	CP014294.1,CP014295.1,CP014296.1,CP014297.1,CP014298.1,CP014299.1,CP014300.1	224	12933	3
Xanthomonas axonopodis Xac29-1	Xac29-1	ASM34858v1	CP004399.1,CP004402.1,CP004401.1,CP004400.1	130	12932	3
Streptomyces sp. fd1-xmd	fd1-xmd	ASM200768v1	CP019798.1	32	12929	3
Escherichia coli	14EC007	ASM285541v1	CP024131.1,CP024132.1,CP024133.1	276	12918	3
Legionella pneumophila	Philadelphia_1_ATCC	ASM175274v1	CP015927.1	28	12903	3
Legionella pneumophila	C9_S	ASM175308v1	CP015941.1,CP015943.1,CP015942.1	28	12903	3
Legionella pneumophila	Philadelphia_2	ASM175278v1	CP015929.1	28	12903	3
Legionella pneumophila	Philadelphia_3	ASM175280v1	CP015930.1	28	12903	3
Legionella pneumophila	Philadelphia-1	ASM194158v1	CP013742.1	30	12903	3
Legionella pneumophila	E3_N	ASM175328v1	CP015949.1	30	12903	3
Legionella pneumophila	C8_S	ASM175306v1	CP015939.1,CP015940.1	29	12903	3
Legionella pneumophila	C10_S	ASM175310v1	CP015944.1	28	12903	3
Legionella pneumophila	C6_S	ASM175294v1	CP015937.1	26	12903	3
Legionella pneumophila	Philadelphia_4	ASM175282v1	CP015931.1	28	12903	3
Legionella pneumophila	E10_P	ASM175270v1	CP015925.1	26	12903	3
Legionella pneumophila	C2_S	ASM175286v1	CP015933.1	26	12903	3
Legionella pneumophila	Philadelphia_1_CDC	ASM175276v1	CP015928.1	30	12903	3
Legionella pneumophila	C5_P	ASM175292v1	CP015936.1	29	12903	3
Legionella pneumophila	E8_O	ASM175338v1	CP015955.1	30	12903	3
Lactobacillus sakei	WiKim0063	ASM225003v1	CP022709.1,CP022710.1,CP022711.1	47	12900	3
Escherichia coli	D8	ASM190039v1	CP010151.1	58	12896	3
Salmonella enterica subsp. diarizonae serovar 65:c:z str. SA20044251	SA20044251	ASM221182v1	CP022135.1,CP022136.1,CP022137.1	68	12885	3
Desulfovibrio fairfieldensis	CCUG 45958	ASM155360v1	CP014229.1	50	12882	3
Xenorhabdus nematophila AN6/1	AN6/1	XNC2	LN681227.1,LN681228.1	307	12880	3
Prevotella intermedia	KCOM 2838	ASM276378v1	CP024725.1,CP024726.1	42	12876	3
Cupriavidus necator N-1	N-1	ASM21921v1	CP002877.1,CP002878.1,CP002879.1,CP002880.1	269	12869	3
Helicobacter typhlonius	NA	htyphlonius_mit97-6810	LN907858.1	20	12868	3
Klebsiella pneumoniae	FDAARGOS_446	ASM258788v1	CP023946.1,CP023948.1,CP023947.1,CP023945.1	149	12862	3
Xanthomonas oryzae pv. oryzae	PXO145	ASM174661v1	CP013961.1	646	12853	3
Escherichia coli O182:H21	D181	ASM274127v1	CP024252.1,CP024249.1,CP024250.1,CP024251.1,CP024253.1	166	12844	3
Haemophilus ducreyi	GHA8	ASM164789v1	CP015433.1	33	12844	3
Lactococcus lactis subsp. lactis	229	ASM207841v1	CP015896.1,CP016694.1,CP016695.1,CP016696.1,CP016697.1,CP016698.1	251	12842	3
Escherichia coli	EC974	ASM219647v1	CP021840.1,CP021841.1,CP021842.1,CP021843.1	215	12840	3
Cedecea neteri	ND14a	ASM75832v1	CP009459.1	23	12835	3
Klebsiella pneumoniae	CR14	ASM195291v1	CP015392.1,CP015393.1,CP015394.1,CP015395.1,CP015396.1,CP015397.1	288	12806	3
Escherichia coli	JJ1897	ASM151365v1	CP013837.1,CP013836.1	102	12787	3
Aeromonas caviae	FDAARGOS_72	ASM78377v2	CP026055.1	50	12778	3
Cedecea neteri	SSMD04	ASM75782v1	CP009451.1	50	12778	3
Corynebacterium glutamicum	XV	ASM193619v1	CP018175.1,CP018174.1	71	12778	3
Mycobacterium chimaera	ZUERICH-2	ASM221924v1	CP015267.1,CP015268.1,CP015269.1,CP015270.1,CP015271.1	166	12769	3
Acinetobacter baumannii	YU-R612	ASM154399v1	CP014215.1,CP014216.1,CP014217.1	81	12765	3
Mycoplasma gallisepticum NY01_2001.047-5-1P	NY01_2001.047-5-1P	ASM28673v1	CP003509.1	22	12750	3
Bifidobacterium pseudolongum subsp. globosum DSM 20092	DSM 20092	ASM270666v1	CP017695.1	29	12748	3
Klebsiella pneumoniae	MS6671	MS6671.v1	LN824133.1,LN824139.1,LN824134.1,LN824135.1,LN824136.1,LN824137.1,LN824138.1	113	12724	3
Pseudomonas aeruginosa	S86968	ASM151584v2	CP008865.2	111	12715	3
Pseudomonas aeruginosa	8380	ASM154813v1	AP014839.2	45	12714	3
Chryseobacterium sp. IHBB 10212	IHBB 10212	ASM164815v1	CP015199.1,CP015200.1,CP015201.1	34	12699	3
Acidipropionibacterium acidipropionici	ATCC 55737	ASM160211v1	CP014352.1,CP014353.1	49	12690	3
Marinifilaceae bacterium SPP2	SPP2	ASM235629v1	AP018042.1	29	12680	3
Enterobacteriaceae bacterium ENNIH2	ENNIH2	ASM290304v1	CP026192.1,CP026191.1,CP026189.1,CP026190.1,CP026188.1,CP026187.1	141	12660	3
Phaeobacter inhibens	P24	ASM289166v1	CP010696.1,CP010697.1,CP010698.1,CP010699.1,CP010700.1,CP010701.1,CP010702.1,CP010703.1,CP010704.1	46	12650	3
Bacillus amyloliquefaciens DSM 7	DSM 7	ASM19673v1	FN597644.1	27	12648	3
Bacillus amyloliquefaciens LL3	LL3	ASM20427v1	CP002634.1,CP002635.1	18	12645	3
Legionella pneumophila subsp. fraseri	Dallas 1E	ASM188683v1	CP017458.1	32	12644	3
Pseudomonas aeruginosa	Ocean-1175	ASM223742v1	CP022525.1	71	12639	3
Pseudomonas aeruginosa	Ocean-1155	ASM223740v1	CP022526.1	77	12638	3
Mycobacterium tuberculosis	Beijing-like/38774	ASM211679v1	CP017595.1	87	12634	3
Vibrio cholerae	2012EL-2176	ASM76541v1	CP007634.1,CP007635.1,CP007636.1	114	12627	3
Cronobacter malonaticus	CMCC45402	ASM50454v1	CP006731.1,CP006732.1,CP006733.1	31	12616	3
Bartonella henselae str. Houston-1	Houston-1	ASM4670v1	BX897699.1	83	12608	3
Bartonella henselae	BM1374163	PRJEB4971_assembly_1	HG965802.1	68	12607	3
Bartonella henselae	MVT02	Bartonella_henselae_MVT02	LN879429.1	68	12607	3
Methylobacterium phyllosphaerae	CBMB27	ASM193617v1	CP015367.1,CP015368.1,CP015369.1,CP015370.1	112	12603	3
Bartonella henselae	Houston-I	ASM273524v1	CP020742.1	95	12599	3
Haemophilus ducreyi	FDAARGOS_297	ASM220866v1	CP022037.1	31	12593	3
Haemophilus ducreyi 35000HP	35000HP	ASM794v1	AE017143.1	29	12593	3
Flavobacterium columnare	Pf1	ASM167739v1	CP016277.1	108	12563	3
Streptomyces lydicus	A02	ASM95203v2	CP007699.2	64	12544	3
Alloactinosynnema sp. L-07	L-07	Alloactinosynnema_sp._L-07	LN850107.1	29	12510	3
Bacterioplanes sanyensis	NV9	ASM223753v1	CP022530.1	64	12485	3
Borrelia burgdorferi JD1	JD1	ASM16665v1	CP002312.1,CP002316.1,CP002310.1,CP002323.1,CP002309.1,CP002321.1,CP002320.1,CP002307.1,CP002311.1,CP002322.1,CP002313.1,CP002308.1,CP002306.1,CP002314.1,CP002318.1,CP002317.1,CP002324.1,CP002319.1,CP002315.1,CP002325.1,CP001652.1	114	12479	3
Rhodobacteraceae bacterium	G7	ASM285043v1	CP021114.1,CP021115.1,CP021116.1,CP021117.1	26	12468	3
Borreliella burgdorferi	B331	ASM244259v1	CP017201.1,CP017202.1,CP017203.1,CP017204.1,CP017205.1,CP017206.1,CP017207.1,CP017208.1,CP017209.1,CP017210.1,CP017211.1,CP017212.1,CP017213.1,CP017214.1,CP017215.1,CP017216.1,CP017217.1,CP017218.1,CP017219.1	67	12462	3
Xanthomonas citri pv. phaseoli var. fuscans	CFBP6975	ASM275925v1	CP021006.1,CP021008.1,CP021009.1,CP021007.1,CP021010.1	395	12458	3
Escherichia coli	DSM 103246	ASM205876v1	CP019944.1	152	12455	3
Microbacterium aurum	KACC 15219	ASM197498v1	CP018762.1	46	12455	3
Lysinibacillus sphaericus	OT4b.25	ASM158187v1	CP014643.1,CP014644.1	58	12449	3
Vibrio cholerae	1154-74	ASM96923v1	CP010811.1	84	12449	3
Klebsiella pneumoniae	KPN1482	ASM215674v1	CP020841.1,CP020842.1,CP020843.1,CP020844.1,CP020846.1,CP020845.1	159	12436	3
Enterobacter asburiae	ATCC 35953	ASM152171v1	CP011863.1,CP011864.1,CP011865.1,CP011866.1,CP011867.1	146	12419	3
Escherichia coli	M3	ASM190104v1	CP010183.1,CP010184.1,CP010185.1	69	12411	3
Escherichia coli	M1	ASM190102v1	CP010180.1,CP010181.1,CP010182.1	73	12411	3
Corynebacterium ammoniagenes	KCCM 40472	ASM200524v1	CP019705.1	15	12388	3
Campylobacter concisus 13826	13826	ASM1772v2	CP000792.2,CP000794.1,CP000793.1	34	12381	3
Klebsiella pneumoniae	CAV1344	ASM102217v1	CP011624.1,CP011623.1,CP011619.1,CP011620.1,CP011621.1,CP011622.1	248	12381	3
Klebsiella pneumoniae	CAV1193	ASM145613v1	CP013322.1,CP013324.1,CP013323.1,CP013321.1,CP013326.1,CP013325.1	242	12381	3
Vibrio vulnificus	FORC_009	ASM143343v1	CP009984.1,CP009985.1	138	12380	3
Sinorhizobium meliloti	USDA1106	ASM219706v1	CP021797.1,CP021798.1,CP021799.1	226	12379	3
Escherichia coli	S17-13	ASM280434v1	CP024997.1	85	12376	3
Legionella pneumophila subsp. pascullei	D-7158	ASM159064v1	CP014256.1	24	12368	3
Legionella pneumophila subsp. pascullei	F-4185	ASM159061v1	CP014255.1	21	12368	3
Halobacillus mangrovi	KTB 131	ASM209753v1	CP020772.1	13	12366	3
Haematospirillum jordaniae	H5569	ASM161197v1	CP014525.1,CP014526.1,CP014527.1	35	12356	3
Sphingomonas sp. MM-1	MM-1	ASM34767v2	CP004036.1,CP004037.1,CP004038.1,CP004039.1,CP004040.1,CP004041.2	205	12349	3
Alcaligenes faecalis	JQ135	ASM224217v1	CP021641.1	16	12338	3
Escherichia albertii	1551-2	ASM289520v1	CP025317.1	50	12336	3
Bacillus cereus	CMCC P0021	ASM163591v1	CP011151.1,CP011152.1	77	12328	3
Listeria innocua Clip11262	Clip11262	ASM19579v1	AL592022.1,AL592102.1	29	12324	3
Streptomyces xinghaiensis S187	S187	ASM22070v2	CP023202.1	39	12295	3
Oblitimonas alkaliphila	C6918	ASM126721v1	CP012360.1	17	12288	3
Komagataeibacter europaeus	SRCM101446	ASM217351v1	CP021467.1,CP021468.1,CP021469.1,CP021470.1	72	12269	3
Escherichia coli	C4	ASM190031v1	CP010121.1	43	12262	3
Klebsiella pneumoniae	NA	ASM170538v1	CP015822.1,CP015823.1,CP015824.1,CP015825.1	161	12259	3
Pseudomonas sp. HLS-6	HLS-6	ASM275399v1	CP024478.1	66	12241	3
Mycoplasma gallisepticum NC06_2006.080-5-2P	NC06_2006.080-5-2P	ASM28677v1	CP003511.1	24	12234	3
Lactococcus lactis subsp. lactis	C10	ASM207845v1	CP015898.1,CP016703.1	61	12232	3
Lysinibacillus fusiformis	RB-21	ASM72477v3	CP010820.1	36	12228	3
Escherichia coli	NA	WI1-reUpload	LT838196.1,LT838197.1,LT838198.1,LT838199.1	85	12223	3
Pseudomonas alkylphenolica	KL28	ASM74652v1	CP009048.1	51	12216	3
Lactococcus lactis subsp. lactis	UL8	ASM207885v1	CP015908.1,CP016704.1,CP016705.1,CP016706.1	70	12205	3
Ralstonia solanacearum Po82	Po82	ASM21532v1	CP002819.1,CP002820.1	123	12200	3
Chlorobium limicola DSM 245	DSM 245	ASM2046v1	CP001097.1	54	12199	3
Paenibacillus sp. FSL P4-0081	FSL P4-0081	ASM75856v1	CP009280.1	52	12182	3
Nitrosomonas eutropha C91	C91	ASM1476v1	CP000450.1,CP000451.1,CP000452.1	100	12173	3
Acinetobacter baumannii NCGM 237	NCGM 237	ASM82879v1	AP013357.1	89	12166	3
Klebsiella oxytoca	CAV1015	ASM187018v1	CP017928.1,CP017931.1,CP017930.1,CP017933.1,CP017932.1,CP017929.1	109	12163	3
Moorella thermoacetica	DSM 103132	ASM172994v1	CP017019.1	39	12163	3
Escherichia coli	NMEC O18	ASM102159v1	CP007275.1	50	12159	3
Nonlabens sp. MB-3u-79	MB-3u-79	ASM283162v1	CP025116.1	28	12155	3
Gordonia bronchialis DSM 43247	DSM 43247	ASM2478v1	CP001802.1,CP001803.1	111	12143	3
Mycobacterium vanbaalenii PYR-1	PYR-1	ASM1530v1	CP000511.1	101	12138	3
Burkholderia sp. OLGA172	OLGA172	ASM163436v1	CP014578.1,CP014579.1,CP014580.1,CP014581.1,CP014582.1	269	12126	3
Legionella pneumophila	Pontiac	ASM167711v2	CP016029.2	45	12115	3
Klebsiella pneumoniae subsp. pneumoniae KPNIH27	KPNIH27	ASM69593v1	CP007731.1,CP007732.1,CP007733.1,CP007734.1,CP007735.1,CP007736.1	385	12109	3
Vibrio alginolyticus	ZJ-T	ASM167974v1	CP016224.1,CP016225.1	79	12106	3
Yersinia pseudotuberculosis	EP2/+	ASM83441v1	CP009759.1,CP009758.1	91	12105	3
Shewanella baltica OS223	OS223	ASM2166v1	CP001252.1,CP001253.1,CP001254.1,CP001255.1	178	12101	3
Polaribacter sp. ALD11	ALD11	ASM283168v1	CP025119.1	61	12098	3
Burkholderia pseudomallei TSV 48	TSV 48	ASM77049v1	CP009161.1,CP009160.1	84	12092	3
Escherichia coli	UPEC 26-1	ASM169331v1	CP016497.1,CP016498.1	93	12092	3
Escherichia coli	746	ASM231065v1	CP023353.1,CP023354.1,CP023355.1,CP023356.1	121	12090	3
Pannonibacter phragmitetus	31801	ASM148406v1	CP013068.1,CP013069.1	35	12076	3
Archangium gephyra	DSM 2261	ASM102728v1	CP011509.1	41	12065	3
Methylomonas sp. DH-1	DH-1	ASM164468v1	CP014360.1,CP014361.1	170	12052	3
Escherichia coli	CV839-06	ASM289390v2	CP025753.1,CP025751.1,CP025752.1	118	12035	3
Haemophilus ducreyi	VAN2	ASM164769v1	CP015425.1	14	12035	3
Colwellia psychrerythraea 34H	34H; BAA-681	ASM1232v1	CP000083.1	32	12033	3
Haemophilus ducreyi	GHA1	ASM164781v1	CP015429.1	17	12033	3
Haemophilus ducreyi	GHA2	ASM164783v1	CP015430.1	18	12033	3
Klebsiella pneumoniae	KPN528	ASM215678v1	CP020853.1,CP020854.1,CP020855.1,CP020856.1	205	12031	3
Escherichia coli	KSC1031	ASM216393v1	CP019560.1,CP019561.1	84	12025	3
Psychrobacter cryohalolentis	FDAARGOS_308	ASM220876v1	CP022043.1,CP022042.1	22	12018	3
Serratia ficaria	NCTC12148	50465_F01	LT906479.1	35	12016	3
Escherichia albertii	ChinaSP140150	ASM287245v1	CP025676.1,CP025677.1,CP025678.1,CP025679.1	145	12013	3
Mycoplasma gallisepticum CA06_2006.052-5-2P	CA06_2006.052-5-2P	ASM28679v1	CP003512.1	25	12012	3
Yersinia pseudotuberculosis IP 31758	IP 31758	ASM1694v1	CP000720.1,CP000719.1,CP000718.1	72	12011	3
Yersinia pseudotuberculosis str. PA3606	Pa3606	ASM83494v1	CP010067.1,CP010069.1,CP010068.1	84	12011	3
Acinetobacter baumannii MDR-ZJ06	MDR-ZJ06	ASM22627v1	CP001937.1,CP001938.1	61	11999	3
Rhizobium leguminosarum	Vaf10	ASM167978v1	CP016286.1,CP016287.1,CP016289.1,CP016290.1,CP016292.1,CP016293.1,CP016291.1,CP016288.1	1421	11996	3
Lactobacillus plantarum	MF1298	ASM188018v1	CP013149.1,CP013150.1,CP013151.1,CP013152.1,CP013161.1,CP013162.1,CP013163.1,CP013164.1,CP013165.1,CP013166.1,CP013167.1,CP013168.1,CP013169.1,CP013170.1,CP013153.1,CP013171.1,CP013172.1,CP013173.1,CP013174.1,CP013175.1,CP013176.1,CP013177.1,CP013154.1,CP013155.1,CP013156.1,CP013157.1,CP013158.1,CP013159.1,CP013160.1	93	11994	3
Ralstonia solanacearum	CQPS-1	ASM222046v1	CP016914.1,CP016915.1	181	11986	3
Bacillus licheniformis	SCCB 37	ASM207413v1	CP014794.1	45	11971	3
Vibrio natriegens	CCUG 16374	ASM168008v1	CP016351.1,CP016352.1	89	11966	3
Streptomyces sp. Sge12	Sge12	ASM208045v1	CP020555.1,CP020556.1	23	11961	3
Escherichia coli	ATCC 43886	ASM274129v1	CP024256.1,CP024254.1,CP024255.1	167	11954	3
Escherichia coli	E62	ASM222021v1	CP022393.1	54	11946	3
Legionella pneumophila	ST42	2531STDY5467415	LT632617.1	26	11942	3
Luteipulveratus mongoliensis	MN07-A0370	ASM119094v1	CP011112.1	18	11938	3
Burkholderia mallei	2002721276	ASM95962v1	CP010065.1,CP010066.1	339	11928	3
Streptococcus lutetiensis 033	33	ASM44153v1	CP003025.1	49	11927	3
Escherichia coli str. Sanji	Sanji	ASM161075v1	CP011061.1,CP011067.1,CP011062.1,CP011066.1,CP011065.1,CP011064.1,CP011063.1	222	11926	3
Pseudomonas aeruginosa	F22031	ASM81698v1	CP007399.1	82	11925	3
Bacteroides thetaiotaomicron VPI-5482	VPI-5482	ASM1106v1	AE015928.1,AY171301.1	59	11921	3
Klebsiella pneumoniae	KSB2_1B	ASM275301v1	CP024504.1,CP024507.1,CP024506.1,CP024508.1,CP024509.1,CP024510.1,CP024511.1,CP024512.1,CP024513.1,CP024514.1,CP024505.1	137	11920	3
Bifidobacterium longum subsp. longum GT15	GT15	ASM77248v1	CP006741.1	9	11913	3
Escherichia coli 1303	1303	ASM82998v1	CP009166.1,CP009167.1,CP009169.1,CP009168.1	75	11905	3
Arthrobacter sp. QXT-31	QXT-31	ASM196926v1	CP019304.1	87	11892	3
Burkholderia glumae BGR1	BGR1	ASM2264v1	CP001503.2,CP001504.2,CP001505.1,CP001506.1,CP001507.2,CP001508.2	762	11891	3
Escherichia coli	95JB1	ASM215682v1	CP021335.1,CP021336.1,CP021337.1	289	11887	3
Sulfurospirillum multivorans DSM 12446	DSM 12446	ASM56881v1	CP007201.1	44	11883	3
Psychrobacter sp. PRwf-1	PRwf-1	ASM1688v1	CP000713.1,CP000714.1,CP000715.1	73	11874	3
Burkholderia cepacia ATCC 25416	UCB 717	ASM141149v1	CP012981.1,CP012982.1,CP012983.1,CP012984.1	113	11872	3
Burkholderia pseudomallei MSHR520	MSHR520	ASM58383v1	CP004368.1,CP004369.1	151	11847	3
Pseudomonas mosselii SJ10	SJ10	ASM49897v2	CP009365.1	38	11847	3
Legionella pneumophila	E6_N	ASM175334v1	CP015953.1	26	11829	3
Psychrobacter alimentarius	PAMC 27889	ASM160602v1	CP014945.1,CP014946.1	16	11824	3
Klebsiella pneumoniae	AR_0112	ASM218015v1	CP021549.1,CP021544.1,CP021545.1,CP021546.1,CP021547.1,CP021548.1	158	11816	3
Escherichia coli	M19	ASM190121v1	CP010221.1,CP010222.1,CP010223.1,CP010224.1,CP010225.1	100	11814	3
Escherichia coli	HST04	ASM211809v1	CP013952.1	83	11807	3
Mycobacterium sp. MCS	MCS	ASM1416v1	CP000384.1,CP000385.1	91	11805	3
Shewanella baltica OS185	OS185	ASM1732v1	CP000753.1,CP000754.1	90	11773	3
Shewanella baltica OS195	OS195	ASM1876v1	CP000891.1,CP000892.1,CP000893.1,CP000894.1	130	11773	3
Citrobacter freundii	CAV1741	ASM102227v1	CP011657.1,CP011654.1,CP011655.1,CP011653.1,CP011651.1,CP011652.1,CP011656.1	86	11762	3
Salmonella enterica subsp. diarizonae serovar 50:k:z str. MZ0080	MZ0080	ASM221196v1	CP022142.1	69	11762	3
Klebsiella pneumoniae	P1428	ASM276131v1	CP017994.1	52	11755	3
Escherichia coli	M6	ASM190106v1	CP010186.1,CP010187.1,CP010188.1,CP010189.1,CP010190.1	95	11754	3
Escherichia coli	M9	ASM190110v1	CP010196.1,CP010197.1,CP010198.1,CP010199.1	90	11754	3
Klebsiella pneumoniae	SGH10	ASM281359v1	CP025080.1,CP025081.1	64	11752	3
Paenibacillus borealis	DSM 13188	ASM75866v1	CP009285.1	50	11752	3
Cutibacterium acnes	KCOM 1861 (= ChDC B594)	ASM128106v1	CP012647.1	10	11749	3
Klebsiella oxytoca	CAV1752	ASM197083v1	CP018362.1,CP018360.1,CP018361.1,CP018357.1,CP018358.1,CP018359.1	182	11746	3
Xanthomonas oryzae pv. oryzicola	L8	ASM104285v1	CP011960.1	340	11739	3
Xanthomonas oryzae pv. oryzicola	B8-12	ASM104274v1	CP011955.1	342	11739	3
Arthrobacter sp. IHBB 11108	IHBB 11108	ASM95057v1	CP011005.1,CP011006.1	14	11735	3
Nocardiopsis gilva YIM 90087	YIM 90087	ASM226349v1	CP022753.1	36	11733	3
Serratia marcescens	UMH6	ASM222067v1	CP018926.1	36	11723	3
Salmonella enterica	LT2	ASM155835v1	CP014051.1,CP014050.1	46	11710	3
Thermoanaerobacter brockii subsp. finnii Ako-1	Ako-1	ASM17529v2	CP002466.1	72	11698	3
Thermoanaerobacter pseudethanolicus ATCC 33223	ATCC 33223; 39E	ASM1908v1	CP000924.1	78	11694	3
Escherichia coli	S43	ASM190098v1	CP010237.1	89	11686	3
Aeromonas caviae	8LM	ASM95970v2	CP024198.1	53	11679	3
Salmonella enterica subsp. enterica serovar Typhimurium str. LT2	LT2; SGSC 1412; ATCC 700720	ASM694v2	AE006468.2,AE006471.2	46	11668	3
Staphylococcus aureus subsp. aureus	FORC_001	ASM77202v1	CP009554.1	52	11666	3
Escherichia coli	M10	ASM190112v1	CP010200.1,CP010201.1,CP010202.1,CP010203.1,CP010204.1,CP010205.1	66	11663	3
Arthrobacter sp. YC-RL1	YC-RL1	ASM145498v1	CP013297.1,CP013298.1,CP013299.1	32	11662	3
Salmonella enterica subsp. enterica serovar Typhimurium str. T000240	T000240	ASM28373v1	AP011957.1,AP011958.1,AP011959.1	67	11659	3
Trichodesmium erythraeum IMS101	IMS101	ASM1426v1	CP000393.1	463	11654	3
Streptococcus agalactiae	NGBS128	ASM155203v1	CP012480.1,CP012742.1	40	11651	3
Blastomonas sp. RAC04	RAC04	ASM171343v1	CP016460.1,CP016462.1,CP016458.1,CP016459.1,CP016461.1	12	11648	3
Halomonas sp. R57-5	NA	HalomonasR57-5	LN813019.1	21	11642	3
Lactobacillus gallinarum	HFD4	ASM131424v2	CP012890.1,CP012891.1,CP012892.1,CP012893.1,CP012895.1,CP012896.1	322	11632	3
Rhodococcus sp. B7740	B7740	ASM95411v1	CP010797.1	30	11630	3
Clostridium saccharoperbutylacetonicum N1-4(HMT)	N1-4(HMT)	ASM34088v1	CP004121.1,CP004122.1	64	11629	3
Acidithiobacillus ferrivorans SS3	SS3	ASM21409v3	CP002985.1	79	11623	3
Shigella boydii CDC 3083-94	BS512; CDC 3083-94	ASM2018v1	CP001063.1,CP001058.1,CP001062.1,CP001059.1,CP001060.1,CP001061.1	1060	11620	3
Salmonella enterica subsp. enterica serovar Typhimurium str. U288	U288	ASM38032v1	CP003836.1,CP004058.1,CP004059.1,CP004060.1	50	11619	3
Salmonella enterica subsp. enterica	ST1120	ASM220185v1	CP021909.1,CP021910.1	47	11617	3
Chitinophagaceae bacterium 13	13	ASM255779v1	CP023777.1	52	11607	3
Aerococcus urinae	CCUG36881	ASM154317v1	CP014161.1	20	11606	3
Aeromonas hydrophila	AL06-06	ASM94091v1	CP010947.1,CP010948.1,CP010949.1,CP010950.1	37	11592	3
Candidatus Caedibacter acanthamoebae	NA	ASM74303v1	CP008936.1,CP008937.1,CP008938.1,CP008939.1,CP008940.1	118	11590	3
Capnocytophaga sp. ChDC OS43	ChDC OS43	ASM220944v1	CP022022.1	67	11588	3
Flavobacterium columnare	TC 1691	ASM193639v1	CP018912.1	105	11581	3
Pseudomonas putida S16	S16	ASM21970v1	CP002870.1	96	11580	3
Yersinia pestis Angola	Angola	ASM1880v1	CP000901.1,CP000902.1,CP000900.1	437	11564	3
Bacillus velezensis	10075	ASM289384v1	CP025939.1,CP025940.1	42	11561	3
Salmonella enterica subsp. enterica serovar Minnesota	CFSAN017963	ASM219653v1	CP017720.1,CP017721.1,CP017722.1	71	11543	3
Chryseobacterium camelliae	Dolsongi-HT1	ASM277059v1	CP022986.1	31	11540	3
Capnocytophaga sputigena	H4486	ASM230259v1	CP022383.1	25	11525	3
Melittangium boletus DSM 14713	DSM 14713	ASM230585v1	CP022163.1	126	11525	3
Arthrobacter sp. A3	A3	ASM75558v2	CP013745.1,CP013746.1	33	11522	3
Aeromonas hydrophila	AH10	ASM96364v1	CP011100.1	32	11507	3
Vibrio cholerae	E1162	ASM188749v1	CP013309.1,CP013310.1	145	11504	3
Escherichia coli	ST648	ASM148545v1	CP008697.1,CP008715.1,CP008716.1,CP008717.1,CP008718.1,CP008719.1,CP008720.1,CP008721.1	81	11502	3
Legionella pneumophila subsp. pneumophila	FFI103	ASM176629v1	CP016870.1,CP016871.1	43	11501	3
Legionella pneumophila subsp. pneumophila	FFI102	ASM176627v1	CP016868.1,CP016869.1	42	11501	3
Legionella pneumophila subsp. pneumophila	FFI329	ASM176635v1	CP016874.1,CP016875.1	39	11501	3
Bacillus licheniformis	BL1202	ASM172612v1	CP017247.1	69	11477	3
Corynebacterium diphtheriae 31A	31A	ASM24187v1	CP003206.1	43	11471	3
Pseudomonas monteilii	USDA-ARS-USMARC-56711	ASM153474v1	CP013997.1	40	11461	3
Bacillus thuringiensis	HS18-1	ASM118278v1	CP012099.1,CP012100.1,CP012101.1,CP012102.1,CP012103.1,CP012104.1,CP012105.1,CP012106.1,CP012107.1,CP012108.1	113	11455	3
Burkholderiales bacterium GJ-E10	GJ-E10	ASM82897v1	AP014683.1	80	11455	3
Delftia sp. Cs1-4	Cs1-4	ASM21439v1	CP002735.1	26	11445	3
Streptomyces sp. MOE7	MOE7	ASM209033v1	CP019779.1	35	11442	3
Clostridium pasteurianum BC1	BC1	ASM38963v1	CP003261.1,CP003262.1	124	11438	3
Desulfobulbus propionicus DSM 2032	DSM 2032	ASM18688v1	CP002364.1	33	11434	3
Pseudomonas lundensis	AU1044	ASM102072v2	CP017687.1	23	11431	3
Limnohabitans sp. 63ED37-2	63ED37-2	ASM141253v1	CP011774.1	21	11423	3
Escherichia coli	D7	ASM190037v1	CP010150.1	48	11418	3
Bacillus sp. 1s-1	1s-1	ASM226927v1	CP022874.1	15	11405	3
Burkholderia pseudomallei	3921	BP_3921g	LK936442.1,LK936443.1	98	11403	3
Sinorhizobium meliloti	USDA1157	ASM219702v1	CP021793.1,CP021796.1,CP021794.1,CP021795.1	358	11399	3
Bacillus licheniformis	BL-010	ASM223689v1	CP022477.1	22	11396	3
Citrobacter werkmanii	FDAARGOS_364	ASM238638v1	CP023504.1	48	11396	3
Escherichia coli LY180	LY180	ASM46851v1	CP006584.1	100	11391	3
Escherichia coli KO11FL	KO11	ASM14785v3	CP002516.1,CP002517.1,CP002518.1	92	11390	3
Escherichia coli W	W	ASM25814v1	CP002967.1,CP002968.1,CP002969.1	75	11390	3
Escherichia coli W	W	ASM18418v1	CP002185.1,CP002186.1,CP002187.1	77	11390	3
Bosea sp. AS-1	AS-1	ASM222009v1	CP022372.1,CP022370.1,CP022371.1	22	11389	3
Capnocytophaga gingivalis	H1496	ASM230241v1	CP022386.1	30	11387	3
Delftia sp. HK171	HK171	ASM188665v1	CP018101.1	32	11386	3
Novosphingobium aromaticivorans DSM 12444	DSM 12444	ASM1332v1	CP000248.1,CP000676.1,CP000677.1	29	11370	3
Legionella pneumophila	NCTC11286	48290_H02	LT906476.1	30	11367	3
Marinobacter sp. CP1	CP1	ASM126679v1	CP011929.1	87	11364	3
Leuconostoc gelidum subsp. gasicomitatum KG16-1	NA	Leuconostoc_gelidum_subsp._gasicomitatum_KG16-1	LN890331.1,LN890332.1,LN890333.1,LN890334.1	19	11353	3
Bacillus subtilis	29R7-12	ASM190255v1	CP017763.1,CP017764.1,CP017765.1	95	11346	3
Ralstonia solanacearum	IBSBF1503	ASM158715v1	CP012943.1,CP012944.1	90	11344	3
Stenotrophomonas nitritireducens	2001	ASM170096v1	CP016756.1	18	11341	3
Roseateles depolymerans	KCTC 42856	ASM148386v1	CP013729.1	9	11333	3
Xanthomonas citri pv. phaseoli var. fuscans	CFBP6167	ASM275941v1	CP021018.1,CP021019.1,CP021020.1,CP021021.1,CP021022.1	347	11330	3
Rhodoferax sp. DCY110	DCY110	ASM195569v1	CP019236.1,CP019237.1,CP019238.1	35	11329	3
Bacillus sp. X1(2014)	X1	ASM74734v1	CP008855.1	141	11326	3
Acetobacter pasteurianus subsp. ascendens	LMG 1590	ASM176623v1	CP015164.1,CP015165.1,CP015166.1,CP015167.1	341	11323	3
Escherichia coli	ABWA45	ASM221172v1	CP022154.1,CP022155.1,CP022156.1,CP022157.1,CP022158.1,CP022159.1	340	11319	3
Vibrio campbellii ATCC BAA-1116	ATCC BAA-1116	ASM46443v1	CP006605.1,CP006606.1,CP006607.1	1085	11317	3
Desulfosporosinus meridiei DSM 13257	DSM 13257	ASM23138v3	CP003629.1	54	11316	3
Alteromonas mediterranea UM4b	UM4b	ASM43959v1	CP004855.1	39	11291	3
Pseudomonas versuta	L10.10	ASM129457v1	CP012676.1	28	11290	3
Leptolyngbya boryana NIES-2135	NIES-2135	ASM236825v1	AP018203.1,AP018204.1,AP018205.1,AP018206.1	136	11289	3
Myxococcus stipitatus DSM 14675	DSM 14675	ASM33173v1	CP004025.1	34	11270	3
Stenotrophomonas maltophilia K279a	K279a	ASM7248v1	AM743169.1	50	11268	3
Acinetobacter pittii	AP_882	ASM157728v1	CP014477.1,CP014478.1,CP014479.1	155	11267	3
Streptococcus thermophilus	ND07	ASM185570v1	CP016394.1	60	11266	3
Acinetobacter baumannii	3207	ASM163623v1	CP015364.1,CP015365.1,CP015366.1	132	11265	3
Blastochloris viridis	DSM 133	BV133_assembly_1.0	AP014854.2	44	11263	3
Blastochloris viridis	ATCC 19567	ASM140287v1	CP012946.1	39	11263	3
Citrobacter werkmanii	BF-6	ASM202522v1	CP019986.1,CP019987.1	43	11259	3
Dickeya fangzhongdai	DSM 101947	ASM281248v1	CP025003.1,CP025004.1	42	11242	3
Sinorhizobium meliloti	T073	ASM219714v1	CP021804.1,CP021807.1,CP021805.1,CP021806.1	211	11237	3
Escherichia coli	14EC017	ASM285365v1	CP024134.1,CP024135.1,CP024136.1,CP024137.1	373	11235	3
Escherichia coli	14EC047	ASM285396v1	CP024155.1,CP024156.1,CP024157.1,CP024158.1	282	11231	3
Stenotrophomonas maltophilia	NCTC10257	49243_F02	LT906480.1	31	11228	3
Myroides sp. ZB35	ZB35	ASM186583v1	CP017769.1	52	11218	3
Escherichia coli	CI5	ASM97161v1	CP011018.1,CP011019.1	62	11206	3
Mycoplasma dispar	ATCC 27140	ASM94107v1	CP007229.1	38	11202	3
Stenotrophomonas maltophilia	ISMMS3	ASM127459v1	CP011010.1	20	11185	3
Stenotrophomonas maltophilia JV3	JV3	ASM22388v1	CP002986.1	15	11181	3
Bacillus licheniformis	ATCC 9789	ASM250432v1	CP023729.1	29	11180	3
Geoalkalibacter subterraneus	Red1	ASM82712v1	CP010311.1,CP010312.1	80	11174	3
Nonlabens sp. MIC269	MIC269	ASM143086v1	CP011373.1	32	11167	3
Listeria monocytogenes	LM850658	ASM118865v1	CP009242.1	12	11163	3
Listeria monocytogenes SLCC2372	SLCC2372	ASM21081v2	FR733648.1,FR667691.1	17	11158	3
Bacillus thuringiensis serovar kurstaki str. YBT-1520	YBT-1520	ASM68879v1	CP004858.1,CP004863.1,CP004859.1,CP004861.1,CP004860.1,CP004862.1,CP004869.1,CP004867.1,CP004866.1,CP004865.1,CP004864.1,CP004868.1	591	11154	3
Bacteroides dorei	NA	ASM127483v1	CP009057.1	58	11153	3
Stenotrophomonas maltophilia R551-3	R551-3	ASM2066v1	CP001111.1	26	11146	3
Stenotrophomonas maltophilia	AA1	ASM202560v1	CP018756.1	24	11143	3
Stenotrophomonas maltophilia	OUC_Est10	ASM213841v1	CP015612.1	35	11142	3
Chryseobacterium gallinarum	DSM 27622	ASM102197v1	CP009928.1	30	11140	3
Stenotrophomonas sp. WZN-1	WZN-1	ASM219225v1	CP021768.1	11	11140	3
Stenotrophomonas maltophilia	FDAARGOS_325	ASM220888v1	CP022053.1	43	11137	3
Vibrio tubiashii ATCC 19109	ATCC 19109	ASM77210v1	CP009354.1,CP009355.1,CP009357.1,CP009356.1,CP009359.1,CP009358.1	39	11137	3
Stenotrophomonas maltophilia	ISMMS2	ASM127465v1	CP011305.1	5	11135	3
Stenotrophomonas maltophilia	ISMMS2R	ASM127467v1	CP011306.1	5	11135	3
Borrelia miyamotoi	Yekat-1	ASM274178v1	CP024333.1,CP024335.1,CP024345.1,CP024346.1,CP024348.1,CP024349.1,CP024337.1,CP024338.1,CP024339.1,CP024340.1,CP024341.1,CP024342.1,CP024343.1,CP024344.1,CP024347.1,CP024336.1,CP024350.1,CP024334.1	42	11134	3
Vibrio fluvialis	ATCC 33809	ASM155841v1	CP014034.1,CP014035.1	58	11134	3
Brevibacillus laterosporus	ZQ2	ASM286552v1	CP025545.1	48	11132	3
Haemophilus ducreyi	VAN4	ASM164776v1	CP015427.1	26	11131	3
Stenotrophomonas maltophilia D457	D457	ASM28459v1	HE798556.1	29	11130	3
Prosthecochloris aestuarii DSM 271	DSM 271	ASM2062v1	CP001108.1,CP001109.1	30	11120	3
Flavobacterium crassostreae	LPB0076	ASM183147v1	CP017688.1	144	11118	3
Cronobacter sakazakii	NCTC 8155	ASM127727v1	CP012253.1,CP012254.1,CP012255.1,CP012256.1	46	11116	3
Staphylococcus aureus	M92	ASM209759v1	CP015447.1	47	11115	3
Oceanobacillus iheyensis HTE831	HTE831	ASM1124v1	BA000028.3	26	11111	3
Sphingomonas melonis TY	TY	ASM176134v1	CP017578.1,CP017579.1	47	11111	3
Gardnerella vaginalis	GV37	ASM195315v1	CP019058.1	23	11099	3
Bacillus pumilus	W3	ASM97268v1	CP011150.1	13	11096	3
Aeromonas salmonicida	A527	ASM276413v1	CP022550.1	133	11086	3
Lactobacillus rhamnosus	BPL5	Lactobacillus_rhamnosus_CECT_8800	LT220504.1	27	11083	3
Escherichia coli APEC O78	APEC O78	ASM33275v1	CP004009.1	75	11075	3
Escherichia coli	SCEC020007	ASM287016v1	CP025627.1,CP025625.1,CP025626.1	136	11067	3
Acinetobacter baumannii	ab736	ASM211692v1	CP015121.1,CP015122.1	26	11061	3
Xenorhabdus bovienii SS-2004	SS-2004	ASM2722v1	FN667741.1	228	11059	3
Sphingopyxis macrogoltabida	203	ASM131432v1	CP009429.1,CP009430.1,CP009431.1	205	11054	3
Bacillus velezensis NAU-B3	NAU-B3	BAPNAU_WGS	HG514499.1,HG514500.1	28	11044	3
Cyanothece sp. PCC 7424	PCC 7424	ASM2182v1	CP001291.1,CP001292.1,CP001293.1,CP001294.1,CP001295.1,CP001296.1,CP001297.1	185	11029	3
Geosporobacter ferrireducens	IRF9	ASM175068v1	CP017269.1,CP017270.1	73	11029	3
Rhodoferax saidenbachensis	DSM 22694	ASM195571v1	CP019239.1	28	11009	3
Aeromonas sp. CU5	CU5	ASM258674v1	CP023817.1	71	10990	3
Desulfocapsa sulfexigens DSM 10523	DSM 10523	ASM34139v1	CP003985.1,CP003986.1	35	10988	3
Bordetella pertussis	VA-UT25Sm1	ASM168662v1	CP015771.1	313	10986	3
Rhizobacter gummiphilus	NBRC 109400	ASM276221v1	CP024645.1	47	10985	3
Rhizobacter gummiphilus	NS21	ASM211690v1	CP015118.1	47	10985	3
Bacillus velezensis YAU B9601-Y2	YAU B9601-Y2	ASM28439v1	HE774679.1	26	10983	3
Halioglobus japonicus	NBRC 107739	ASM198399v1	CP019450.1,CP019451.1,CP019452.1,CP019453.1	24	10983	3
Yersinia enterocolitica	FORC-002	ASM130475v1	CP009456.1,CP009457.1	47	10978	3
Acinetobacter baumannii	D36	ASM139965v1	CP012952.1,CP012953.1,CP012955.1,CP012956.1,CP012954.1	82	10976	3
Chloroflexus sp. Y-400-fl	Y-400-fl	ASM2218v1	CP001364.1	94	10968	3
Vagococcus teuberi	DSM 21459	ASM187020v1	CP017267.1,CP017268.1	31	10964	3
Tatumella citrea	ATCC 39140	ASM216360v1	CP015581.1,CP015582.1	37	10961	3
Vibrio coralliilyticus	58	ASM169361v1	CP016556.1,CP016557.1,CP016558.1	76	10959	3
Terribacillus aidingensis	MP602	ASM72536v1	CP008876.1,CP008877.1	13	10948	3
Erwinia pyrifoliae Ep1/96	Ep1/96	ASM2726v1	FP236842.1,FP236827.1,FP236828.1,FP928999.1,FP236829.1	122	10946	3
Listeria ivanovii subsp. londoniensis	WSLC 30167	ASM76347v1	CP009575.1	32	10946	3
Pseudomonas mandelii JR-1	JR-1	ASM25754v3	CP005960.1,CP005961.1	54	10943	3
Porphyromonas gingivalis	W83	ASM289259v1	CP025932.1	103	10940	3
Porphyromonas gingivalis W83	W83	ASM758v1	AE015924.1	102	10940	3
Amycolatopsis sp. BJA-103	BJA-103	ASM284973v1	CP017780.1	33	10936	3
Helicobacter cetorum MIT 00-7128	MIT 00-7128	ASM25925v1	CP003479.1,CP003480.1	27	10934	3
Streptomyces scabiei 87.22	87.22	ASM9130v1	FN554889.1	68	10933	3
Pelobacter sp. SFB93	SFB93	ASM188777v1	CP015519.1	26	10927	3
Pelodictyon phaeoclathratiforme BU-1	BU-1	ASM2064v1	CP001110.1	58	10927	3
Bartonella quintana RM-11	RM-11	ASM29471v1	CP003784.1	21	10924	3
Zymomonas mobilis subsp. pomaceae ATCC 29192	ATCC 29192	ASM21887v1	CP002865.1,CP002866.1,CP002867.1	18	10923	3
Vibrio natriegens	CCUG 16371	ASM168004v1	CP016347.1,CP016348.1	51	10915	3
Salmonella enterica subsp. salamae serovar 57:z29:z42	ST114	ASM223447v1	CP022467.1	42	10908	3
Parageobacillus thermoglucosidasius	DSM 2542	ASM129536v1	CP012712.1	61	10905	3
Parageobacillus thermoglucosidasius	TM242	ASM190249v1	CP016916.1,CP016917.1,CP016918.1	87	10904	3
Klebsiella aerogenes	AR_0007	ASM279642v1	CP024883.1	31	10903	3
Mycoplasma flocculare ATCC 27399	Ms42	ASM81506v1	CP007585.1	8	10899	3
Parageobacillus thermoglucosidasius	NCIMB 11955	ASM170098v1	CP016622.1,CP016623.1,CP016624.1	87	10899	3
Vibrio coralliilyticus	SNUTY-1	ASM207399v1	CP020453.1,CP020454.1,CP020455.1,CP020456.1	60	10881	3
Sandaracinus amylolyticus	DSM 53668	ASM73732v2	CP011125.1	32	10877	3
Mycobacterium sp. MOTT36Y	MOTT36Y	ASM26216v1	CP003491.1	49	10874	3
Enterococcus faecium	E745	ASM175088v1	CP014529.1,CP014530.1,CP014531.1,CP014532.1,CP014533.1,CP014534.1,CP014535.1	327	10864	3
Brochothrix thermosphacta	BI	ASM238126v1	CP023483.1	37	10859	3
Brochothrix thermosphacta	BII	ASM244251v1	CP023643.1	47	10859	3
Porphyromonas gingivalis	KCOM 2796	ASM275411v1	CP024597.1	112	10840	3
Edwardsiella piscicida	S11-285	ASM172926v1	CP016044.1,CP016445.1	49	10839	3
Escherichia coli	M15	ASM190116v1	CP010213.1,CP010214.1,CP010215.1,CP010216.1,CP010217.1,CP010218.1	98	10839	3
Ottowia sp. oral taxon 894	W10237	ASM126207v1	CP012073.1	49	10832	3
Aerococcus viridans	CCUG4311	ASM154328v1	CP014164.1	133	10828	3
Burkholderia ubonensis	MSMB0783	ASM171869v1	CP013420.1,CP013422.1,CP013421.1	96	10827	3
Xanthomonas oryzae pv. oryzicola	CFBP7342	ASM94082v1	CP007221.1	473	10826	3
Mycoplasma mycoides subsp. mycoides	Ben1	ASM155405v1	CP011260.1	99	10822	3
Acinetobacter baumannii	SSMA17	ASM208288v1	CP020581.1,CP020580.1	61	10820	3
Bacillus cereus	K8	ASM221517v1	CP016595.1,CP016597.1,CP016596.1	40	10819	3
Burkholderia pseudomallei	2008724860	ASM211112v1	CP018384.1,CP018386.1,CP018385.1	144	10818	3
Bacillus thuringiensis str. Al Hakam	Al Hakam	ASM1506v1	CP000485.1,CP000486.1	34	10801	3
Candidatus Liberibacter solanacearum CLso-ZC1	CLso-ZC1	ASM18366v1	CP002371.1	16	10797	3
Leuconostoc mesenteroides subsp. suionicum	LT-38	ASM237039v1	AP017935.1	28	10792	3
Leuconostoc mesenteroides subsp. suionicum	DSM 20241	ASM189112v1	CP015247.1,CP015248.1	26	10792	3
Vibrio vulnificus CMCP6	CMCP6	ASM3976v1	AE016795.3,AE016796.2	116	10780	3
Vibrio vulnificus	FORC_017	ASM167524v1	CP012739.1,CP012740.1,CP012741.1	132	10779	3
Nitrosomonas ureae	Nm10	ASM145520v1	CP013341.1	123	10778	3
Rhodococcus aetherivorans	IcdP1	ASM98271v1	CP011341.1	24	10776	3
Magnetospirillum magneticum AMB-1	AMB-1	ASM998v1	AP007255.1	74	10775	3
Capnocytophaga leadbetteri	H6253	ASM230261v1	CP022384.1	20	10773	3
Lactococcus lactis subsp. lactis	UC77	ASM207861v1	CP015906.1,CP016713.1,CP016714.1	126	10773	3
Vibrio campbellii	BoB-53	ASM290647v1	CP026321.1,CP026322.1	60	10768	3
Escherichia coli	1428	ASM231069v1	CP023366.1,CP023367.1,CP023368.1,CP023369.1,CP023370.1	85	10766	3
Escherichia coli	PSUO2	ASM221509v1	CP011915.1,CP011916.1	58	10761	3
Legionella pneumophila	C3_O	ASM175288v1	CP015934.1	30	10755	3
Bacillus velezensis	G341	ASM102359v1	CP011686.1	34	10749	3
Bacillus amyloliquefaciens IT-45	IT-45	ASM24285v2	CP004065.1,CP004119.1	19	10747	3
Halomonas sp. 1513	1513	ASM197168v1	CP019326.1	40	10747	3
Bacillus velezensis CAU B946	CAU B946	ASM28369v1	HE617159.1	21	10745	3
Lactobacillus plantarum	SRCM102022	ASM217365v1	CP021501.1,CP021502.1,CP021503.1,CP021504.1	46	10738	3
Vibrio coralliilyticus	RE98	ASM77206v1	CP009617.1,CP009618.1,CP009620.1,CP009619.1	36	10738	3
Escherichia coli CFT073	CFT073	ASM744v1	AE014075.1	97	10732	3
Staphylococcus aureus	HOU1444-VR	ASM127874v1	CP012593.1,CP012594.1,CP012595.1,CP012596.1	42	10732	3
Vibrio campbellii	BoB-90	ASM290645v1	CP026315.1,CP026316.1,CP026317.1,CP026318.1,CP026319.1,CP026320.1	638	10730	3
Vibrio owensii	XSBZ03	ASM202175v1	CP019959.1,CP019960.1	73	10722	3
Vibrio harveyi	ATCC 43516	ASM155843v1	CP014038.1,CP014039.1	74	10721	3
Escherichia coli	2013C-4465	ASM164474v1	CP015241.1,CP015242.1	117	10719	3
Lactobacillus reuteri	ZLR003	ASM161890v1	CP014786.1	158	10718	3
Tatumella citrea	DSM 13699	ASM216358v1	CP015579.1,CP015580.1	37	10718	3
Cellulophaga baltica NN016038	NN016038	ASM47703v2	CP009887.1	42	10713	3
Bacillus subtilis subsp. subtilis	SRCM100333	ASM220199v1	CP021892.1,CP021893.1	92	10708	3
Bacillus cereus	03BB87	ASM78931v1	CP009941.1,CP009939.1,CP009940.1	64	10707	3
Eubacterium limosum	ATCC 8486	ASM80767v2	CP019962.1	33	10707	3
Streptomyces violaceusniger Tu 4113	Tu 4113	ASM14781v3	CP002994.1,CP002995.1,CP002996.1	168	10706	3
Shigella sonnei	75/02	ASM215090v1	CP019689.1,CP019690.1,CP019691.1,CP019692.1,CP019693.1,CP019694.1,CP019695.1,CP019696.1	914	10696	3
Campylobacter subantarcticus LMG 24377	LMG 24377	ASM81630v1	CP007773.1	62	10695	3
Vibrio natriegens	CCUG 16373	ASM168006v1	CP016349.1,CP016350.1	99	10693	3
Fusobacterium hwasookii ChDC F206	ChDC F206	ASM145508v1	CP013336.1,CP013337.1	46	10688	3
Coxiella burnetii	3262	ASM157274v1	CP013667.1,CP013668.1	114	10687	3
Acinetobacter baumannii	15A34	ASM208268v1	CP020590.1,CP020589.1	56	10682	3
Acinetobacter baumannii	SSA6	ASM208274v1	CP020591.1	63	10682	3
Vibrio campbellii CAIM 519 = NBRC 15631	ATCC 25920, CAIM 519T	ASM216375v1	CP015863.1,CP015864.1,CP015865.1	99	10677	3
Vibrio campbellii	20130629003S01	ASM214005v1	CP020076.1,CP020077.1,CP020078.1,CP020079.1,CP020080.1,CP020081.1	98	10674	3
Kozakia baliensis	DSM 14400	ASM178733v1	CP014674.1,CP014675.1,CP014676.1,CP014677.1,CP014678.1,CP014679.1,CP014680.1	183	10664	3
Vibrio vulnificus	VV2014DJH	ASM285045v1	CP019320.1,CP019321.1	153	10654	3
Kitasatospora albolonga	YIM 101047	ASM208258v1	CP020563.1	28	10649	3
Tumebacillus sp. AR23208	AR23208	ASM216235v1	CP021434.1	100	10645	3
Vibrio natriegens NBRC 15636 = ATCC 14048 = DSM 759	ATCC 14048	ASM168002v1	CP016345.1,CP016346.1	52	10643	3
Bacillus thuringiensis serovar tolworthi	Pasteur Institute Standard strain	ASM154817v1	AP014864.1,AP014865.1,AP014866.1,AP014867.1,AP014868.1,AP014869.1,AP014870.1,AP014871.1,AP014872.1	737	10642	3
Paenalcaligenes hominis	15S00501	ASM200536v1	CP019697.1	8	10640	3
Bacillus clausii	ENTPro	ASM73730v2	CP012475.1,CP012476.1	38	10637	3
Paenibacillus sp. 32O-W	32O-W	ASM146527v1	CP013653.1	50	10637	3
Klebsiella pneumoniae	INF322	ASM275281v1	CP024482.1,CP024483.1,CP024484.1,CP024485.1,CP024486.1,CP024487.1,CP024488.1	114	10636	3
Klebsiella pneumoniae	INF249	ASM275277v1	CP024489.1,CP024490.1,CP024491.1,CP024492.1,CP024493.1,CP024494.1,CP024495.1	85	10636	3
Caulobacter sp. K31	K31	ASM1914v1	CP000927.1,CP000928.1,CP000929.1	68	10634	3
Listeria monocytogenes	Lm 3163	ASM148340v1	CP013722.1	13	10627	3
Exiguobacterium sp. ZWU0009	ZWU0009	ASM79893v2	CP018057.1	22	10620	3
Paenibacillus polymyxa	YC0136	ASM187440v2	CP017967.2	29	10608	3
Streptococcus suis	HN136	ASM283154v1	CP025095.1	106	10606	3
Bacillus sp. YP1	YP1	ASM87781v1	CP010014.1,CP010015.1	14	10603	3
Bacillus subtilis	ge28	ASM220205v1	CP021903.1	15	10603	3
Clostridium botulinum	A634	ASM286582v1	CP013845.1,CP013846.1,CP013844.1	39	10595	3
Bacillus cereus G9241	G9241	ASM83280v1	CP009590.1,CP009591.1,CP009592.1,CP009589.1	94	10587	3
Listeria monocytogenes	CFSAN022990	ASM210563v1	CP020828.1,CP020829.1	13	10587	3
Listeria monocytogenes	10-092876-1763 LM10	ASM199912v1	CP019623.1	14	10587	3
Helicobacter pylori v225d	v225d	ASM9318v1	CP001582.1,CP001583.1	16	10580	3
Vibrio parahaemolyticus	CHN25	ASM170083v1	CP010883.1,CP010884.1,CP010885.1,CP010886.1,CP010887.1	51	10569	3
Thioploca ingrica	NA	ASM82883v1	AP014633.1	51	10565	3
Polymorphum gilvum SL003B-26A1	SL003B-26A1	ASM19274v1	CP002568.1,CP002569.1	50	10563	3
Erysipelothrix larvae	LV19	ASM154509v1	CP013213.1,CP013214.1	67	10562	3
Pseudarthrobacter sulfonivorans	Ar51	ASM148460v1	CP013747.1,CP013748.1	79	10561	3
Virgibacillus halodenitrificans	PDB-F2	ASM187867v1	CP017962.1,CP017963.1	43	10560	3
Leadbetterella byssophila DSM 17132	DSM 17132	ASM16639v1	CP002305.1	81	10552	3
Pseudomonas amygdali pv. lachrymans	NM002	ASM206813v1	CP020351.1	161	10552	3
Escherichia coli	789	ASM81964v1	CP010315.1,CP010317.1,CP010318.1,CP010316.1	122	10550	3
Klebsiella aerogenes	FDAARGOS_363	ASM259111v1	CP023963.1	45	10550	3
Escherichia coli	ST2747	ASM59970v1	CP007394.1	122	10545	3
Bacillus cereus 03BB108	03BB108	ASM83286v1	CP009641.1,CP009639.1,CP009636.1,CP009640.1,CP009638.1,CP009637.1,CP009635.1,CP009634.1	64	10544	3
Klebsiella pneumoniae	UCLAOXA232KP_Pt0	ASM172172v1	CP012560.1	38	10534	3
Escherichia coli	ETEC-2265	ASM230231v1	CP023346.1,CP023347.1,CP023348.1	247	10527	3
Escherichia coli	ECONIH1	ASM78492v1	CP009859.1,CP009860.1,CP009861.1,CP009862.1	146	10527	3
Bacillus thuringiensis	HD571	ASM83282v1	CP009600.1,CP009599.1	33	10514	3
Escherichia coli	Ecol_745	ASM161834v2	CP015074.2,CP015075.2	81	10514	3
Escherichia coli	6409	ASM81414v2	CP010371.1,CP010372.1,CP010373.2	186	10513	3
Tetragenococcus halophilus NBRC 12172	NBRC 12172	ASM28361v1	AP012046.1	94	10513	3
Citrobacter rodentium ICC168	ICC168	ASM2708v1	FN543502.1,FN543503.1,FN543504.1,FN543505.1	179	10512	3
Clostridium clariflavum DSM 19732	DSM 19732	ASM23708v1	CP003065.1	251	10510	3
Salmonella enterica subsp. enterica serovar Newport	CFSAN003890	ASM189018v1	CP016012.1,CP016013.1	39	10487	3
Salmonella enterica subsp. enterica serovar Newport str. SL254	SL254	ASM1604v1	CP001113.1,CP001112.1,CP000604.1	39	10487	3
Amycolatopsis mediterranei RB	RB	ASM45402v1	CP003777.1	48	10484	3
Amycolatopsis mediterranei S699	S699	ASM22094v1	CP002896.1	50	10484	3
Amycolatopsis mediterranei S699	S699	ASM28271v1	CP003729.1	48	10484	3
Escherichia coli O104:H4 str. 2009EL-2050	2009EL-2050	ASM29925v1	CP003297.1,CP003298.1,CP003299.1,CP003300.1	176	10484	3
Escherichia coli O104:H4 str. 2009EL-2071	2009EL-2071	ASM29947v1	CP003301.1,CP003302.1,CP003303.1	202	10484	3
Escherichia coli	FDAARGOS_401	ASM239346v1	CP023531.1,CP023530.1	212	10483	3
Escherichia coli O104:H4	FDAARGOS_348	ASM220910v1	CP022086.1,CP022085.1,CP022087.1	190	10483	3
Amycolatopsis mediterranei U32	U32	ASM19683v1	CP002000.1	50	10481	3
Campylobacter jejuni subsp. jejuni F38011	F38011	ASM77222v1	CP006851.1	12	10474	3
Salmonella bongori N268-08	N268-08	ASM43925v1	CP006608.1,CP006609.1	48	10470	3
Helicobacter pylori 26695	26695	ASM852v1	AE000511.1	36	10467	3
Helicobacter pylori 26695	26695	ASM30779v1	CP003904.1	36	10467	3
Helicobacter pylori Rif1	Rif1	ASM30781v1	CP003905.1	36	10467	3
Helicobacter pylori Rif2	Rif2	ASM30783v1	CP003906.1	36	10467	3
Helicobacter pylori	26695-dRdM2	ASM290655v1	CP026324.1	36	10465	3
Helicobacter pylori	26695-1MET	ASM82702v1	CP010436.1	38	10465	3
Helicobacter pylori	26695-dR	ASM290653v1	CP026326.1	36	10465	3
Helicobacter pylori	dRdM1	ASM290649v1	CP026325.1	39	10465	3
Helicobacter pylori 26695-1	26695-1	ASM82698v1	CP010435.1	38	10465	3
Helicobacter pylori 26695-1	26695-1	ASM82909v1	AP013354.1	38	10465	3
Helicobacter pylori 26695-1CH	26695-1CH	ASM82913v1	AP013355.1	38	10465	3
Helicobacter pylori 26695-1CL	26695-1CL	ASM82911v1	AP013356.1	36	10465	3
Helicobacter pylori	26695-dRdM1dM2	ASM290651v1	CP026323.1	36	10464	3
Neorhizobium galegae bv. officinalis bv. officinalis str. HAMBI 1141	HAMBI 1141	RG1141_Ch_pA_pB	HG938355.1,HG938356.1,HG938357.1	29	10458	3
Escherichia coli	Z1002	ASM214267v1	CP021202.1,CP021203.1,CP021204.1,CP021205.1,CP021206.1	192	10453	3
Bradyrhizobium diazoefficiens	NK6	ASM154969v1	AP014685.1,AP014659.1,AP014686.1,AP014687.1,AP014688.1	2581	10448	3
Prevotella intermedia	KCOM 2033	ASM276353v1	CP024696.1	72	10446	3
Salmonella enterica	FORC_030	ASM207924v1	CP015598.1,CP015599.1	64	10443	3
Pseudomonas aeruginosa LESB58	LESB58	ASM2664v1	FM209186.1	43	10442	3
Streptococcus sp. oral taxon 431	F0610 (5-114)	ASM155368v1	CP014264.1	42	10441	3
Shigella flexneri	FDAARGOS_74	ASM78373v2	CP026098.1,CP026099.1	770	10438	3
Enterobacter asburiae	ENIPBJ-CG1	ASM161764v1	CP014993.1	49	10427	3
Acinetobacter soli	GFJ2	ASM195319v1	CP016896.1,CP016897.1,CP016898.1,CP016899.1,CP016900.1,CP016901.1,CP016902.1,CP016903.1	31	10418	3
Helicobacter pylori 83	83	ASM21313v1	CP002605.1	14	10413	3
Chlorobium luteolum DSM 273	DSM 273	ASM1248v1	CP000096.1	22	10408	3
Klebsiella pneumoniae	YH43	ASM154831v1	AP014950.1	33	10408	3
Calothrix sp. PCC 6303	PCC 6303	ASM31743v1	CP003610.1,CP003611.1,CP003612.1,CP003613.1	179	10405	3
Cupriavidus metallidurans CH34	CH34	ASM19601v1	CP000352.1,CP000353.2,CP000355.2,CP000354.2	175	10405	3
Lactobacillus oris	J-1	ASM160219v1	CP014787.1,CP014788.1,CP014789.1	109	10397	3
Staphylococcus xylosus	SMQ-121	ASM70941v1	CP008724.1	17	10390	3
Celeribacter manganoxidans	DY25	ASM250416v1	CP021404.1,CP021405.1,CP021406.1,CP021407.1,CP021408.1,CP021409.1,CP021410.1,CP021411.1	14	10378	3
Bacillus simplex	SH-B26	ASM157818v1	CP011008.1,CP011009.1	242	10371	3
Lactobacillus curvatus	WiKim38	ASM172354v1	CP017124.1	59	10371	3
Bartonella quintana str. Toulouse	Toulouse	ASM4668v1	BX897700.1	31	10368	3
Xanthomonas oryzae pv. oryzae	PXO236	ASM174665v1	CP013675.1	615	10365	3
Bordetella pertussis	VA-150	ASM168644v1	CP015762.1	301	10360	3
Brenneria goodwinii	FRB141	ASM229144v1	CP014137.1	45	10355	3
Escherichia coli	ML35	ASM287997v1	CP025747.1	128	10355	3
Xanthomonas citri pv. phaseoli var. fuscans	CFBP6166	ASM275923v1	CP021001.1,CP021002.1,CP021005.1,CP021003.1,CP021004.1	296	10355	3
Bacillus subtilis subsp. subtilis str. BAB-1	BAB-1	ASM34979v1	CP004405.1	17	10353	3
Mycobacterium avium subsp. hominissuis	HP17	ASM271690v1	CP016818.1	40	10347	3
Bacteroides caecimuris	I48	ASM168872v2	CP015401.2	172	10330	3
Mycoplasma mycoides subsp. mycoides	Ben50	ASM155407v1	CP011261.1	109	10321	3
Elizabethkingia genomosp. 3	G0146	ASM202480v1	CP014337.1	20	10315	3
Helicobacter pylori F16	F16	ASM27000v1	AP011940.1	24	10314	3
Listeria monocytogenes	10-092876-0055 LM4	ASM199900v1	CP019617.1	29	10310	3
Cutibacterium avidum	DPC 6544	ASM171470v1	CP016954.1	30	10307	3
Denitrovibrio acetiphilus DSM 12809	DSM 12809	ASM2572v1	CP001968.1	87	10307	3
Streptococcus sp. FDAARGOS_192	FDAARGOS_192	ASM207381v1	CP020431.1,CP020429.1,CP020430.1	33	10301	3
Geobacillus stearothermophilus 10	10	ASM127457v1	CP008934.1,CP008935.1	257	10295	3
Acinetobacter baumannii	AB030	ASM74664v1	CP009257.1	204	10293	3
Escherichia coli P12b	P12b	ASM25727v1	CP002291.1	150	10292	3
Bacillus cohnii	DSM 6307	ASM225005v1	CP018866.1	77	10287	3
Bacillus endophyticus	Hbe603	ASM97224v3	CP011974.1,CP015323.1,CP015324.1,CP015325.1,CP015326.1,CP015327.1,CP015328.1,CP015329.1,CP015330.1	52	10280	3
Salmonella enterica subsp. diarizonae	HZS154	ASM279441v1	CP023345.1	78	10273	3
Klebsiella michiganensis E718	E718	ASM27670v2	CP003683.1,JQ314407.1,CP003684.1	197	10270	3
Persicobacter sp. JZB09	JZB09	ASM130810v1	CP012851.1,CP012852.1,CP012853.1,CP012854.1,CP012855.1,CP012856.1,CP012857.1,CP012858.1,CP012859.1,CP012860.1,CP012861.1,CP012862.1,CP012863.1,CP012864.1,CP012865.1,CP012866.1,CP012867.1	1300	10267	3
Klebsiella pneumoniae	Kp_Goe_39795	ASM190239v1	CP018458.1,CP018460.1,CP018461.1,CP018462.1,CP018459.1	116	10266	3
Sphingomonas sanxanigenens DSM 19645 = NX02	NX02	ASM51220v2	CP006644.1,CP011450.1	127	10265	3
Bacillus gibsonii	FJAT-10019	ASM171918v1	CP017070.1	21	10262	3
Bacillus licheniformis	HRBL-15TDI7	ASM159605v1	CP014781.1	26	10259	3
Dermacoccus nishinomiyaensis	M25	ASM72540v1	CP008889.1,CP008890.1	30	10259	3
Nostoc sp. NIES-3756	NIES-3756	ASM154837v1	AP017295.1,AP017296.1,AP017297.1	70	10253	3
Sphingopyxis fribergensis	Kp5.2	ASM80364v1	CP009122.1,CP009123.1	16	10253	3
Nostoc flagelliforme CCNUN1	CCNUN1	ASM281357v1	CP024785.1,CP024786.1,CP024787.1,CP024788.1,CP024789.1,CP024790.1,CP024791.1,CP024792.1,CP024793.1	1359	10252	3
Borrelia afzelii PKo	PKo	ASM22283v1	CP002933.1,CP002934.1,CP002937.1,CP002935.1,CP002936.1,CP002938.1,CP002939.1,CP002940.1,CP002941.1,CP002942.1,CP002943.1,CP002944.1,CP002945.1,CP002946.1,CP002947.1,CP002948.1,CP002949.1,CP002950.1	76	10251	3
Lactobacillus plantarum	CAUH2	ASM161752v1	CP015126.1,CP015127.1,CP015128.1,CP015129.1	43	10251	3
Vibrio cholerae	E1320	ASM188741v1	CP013311.1,CP013312.1	152	10248	3
Escherichia coli	Ecol_224	ASM201194v1	CP018948.1,CP018947.1,CP018946.1,CP018944.1,CP018943.1,CP018942.1,CP018941.1,CP018940.1,CP018945.1	115	10234	3
Acinetobacter baumannii	AbPK1	ASM275391v1	CP024576.1,CP024577.1,CP024578.1	111	10227	3
Legionella pneumophila	E5_N	ASM175332v1	CP015951.1,CP015952.1	37	10218	3
Vibrio vulnificus	FORC_016	ASM165377v1	CP011775.1,CP011776.1	137	10204	3
Clostridioides difficile	FDAARGOS_267	ASM207373v1	CP020424.1,CP020425.1,CP020426.1	35	10203	3
Acetobacter pasteurianus IFO 3283-01	IFO 3283	ASM1082v1	AP011121.1,AP011122.1,AP011123.1,AP011124.1,AP011125.1,AP011126.1,AP011127.1	635	10202	3
Acetobacter pasteurianus IFO 3283-01-42C	IFO 3283	ASM1094v1	AP011163.1,AP011164.1,AP011165.1,AP011166.1,AP011167.1,AP011168.1,AP011169.1	593	10202	3
Acetobacter pasteurianus IFO 3283-03	IFO 3283	ASM1084v1	AP011128.1,AP011129.1,AP011130.1,AP011131.1,AP011132.1,AP011133.1,AP011134.1	634	10202	3
Acetobacter pasteurianus IFO 3283-07	IFO 3283	ASM1086v1	AP011135.1,AP011136.1,AP011137.1,AP011138.1,AP011139.1,AP011140.1,AP011141.1	632	10202	3
Acetobacter pasteurianus IFO 3283-12	IFO 3283	ASM1096v1	AP011170.1,AP011171.1,AP011172.1,AP011173.1,AP011174.1,AP011175.1,AP011176.1	629	10202	3
Acetobacter pasteurianus IFO 3283-22	IFO 3283	ASM1088v1	AP011142.1,AP011143.1,AP011144.1,AP011145.1,AP011146.1,AP011147.1,AP011148.1	634	10202	3
Acetobacter pasteurianus IFO 3283-26	IFO 3283	ASM1090v1	AP011149.1,AP011150.1,AP011151.1,AP011152.1,AP011153.1,AP011154.1,AP011155.1	634	10202	3
Acetobacter pasteurianus IFO 3283-32	IFO 3283	ASM1092v1	AP011156.1,AP011157.1,AP011158.1,AP011159.1,AP011160.1,AP011161.1,AP011162.1	629	10202	3
Escherichia coli	D6	ASM190069v1	CP010148.1,CP010149.1	55	10202	3
Salmonella enterica subsp. enterica serovar Typhimurium	BL10	ASM276213v2	CP024619.1,CP025337.1,CP025339.1,CP025338.1,CP025340.1,CP025336.1	88	10201	3
Citrobacter freundii	CAV1321	ASM102215v1	CP011612.1,CP011610.1,CP011603.1,CP011604.1,CP011605.1,CP011606.1,CP011607.1,CP011609.1,CP011611.1,CP011608.1	109	10196	3
Shewanella baltica BA175	BA175	ASM14773v3	CP002767.1,CP002768.1,CP002769.1	55	10187	3
Bacillus sp. IHB B 7164	IHB B 7164	ASM164813v1	CP015226.1	20	10172	3
Solibacillus sp. R5-41	R5-41	ASM273610v1	CP024123.1	66	10172	3
Parabacteroides sp. YL27	YL27	ASM168884v2	CP015402.2	108	10171	3
Bacillus megaterium	JX285	ASM200919v1	CP018874.1,CP018876.1,CP018877.1,CP018878.1,CP018879.1,CP018880.1,CP018881.1,CP018875.1	60	10170	3
Vibrio parahaemolyticus	FORC_022	ASM187958v1	CP013248.1,CP013249.1,CP013250.1	94	10156	3
Bartonella clarridgeiae 73	73	ASM25301v1	FN645454.1	30	10147	3
Paeniclostridium sordellii	AM370	ASM286599v1	CP014150.1,CP014149.1	32	10127	3
Neisseria lactamica 020-06	020-06	ASM19629v1	FN995097.1	50	10124	3
Phaeobacter inhibens	P88	ASM289208v1	CP010725.1,CP010726.1,CP010727.1,CP010728.1,CP010729.1,CP010730.1,CP010731.1,CP010732.1,CP010733.1,CP010734.1	29	10124	3
Bacillus subtilis BSn5	BSn5	ASM18674v1	CP002468.1	20	10109	3
Bacillus aryabhattai	K13	ASM268860v1	CP024035.1,CP024036.1,CP024037.1	46	10106	3
Neisseria elongata subsp. glycolytica ATCC 29315	ATCC 29315	ASM81803v1	CP007726.1	31	10106	3
Agrobacterium tumefaciens	S33	ASM155189v1	CP014259.1,CP014260.1	31	10102	3
Colwellia sp. MT41	MT41	ASM144436v1	CP013145.1	114	10100	3
Legionella pneumophila	C1_S	ASM175284v1	CP015932.1	26	10097	3
Streptomyces sp. Tue 6075	Tue6075	ASM193163v1	CP010833.1	19	10096	3
Treponema sp. OMZ 838	OMZ 838	ASM77599v1	CP009227.1	17	10086	3
Enterobacter cloacae	colR/S	ASM162024v1	CP010512.1,CP010513.1	59	10085	3
Clostridium botulinum A2 str. Kyoto	Kyoto	ASM2276v1	CP001581.1	46	10084	3
Bacillus megaterium Q3	Q3	ASM105045v1	CP010586.1,CP010587.1	43	10083	3
Prevotella sp. oral taxon 299 str. F0039	F0039	ASM16305v2	CP003667.1,CP003666.1	18	10083	3
Burkholderia pseudomallei K96243	K96243	ASM95928v1	CP009538.1,CP009537.1	82	10082	3
Burkholderia pseudomallei K96243	K96243	ASM1154v1	BX571965.1,BX571966.1	84	10082	3
Moraxella bovoculi	58069	ASM98860v1	CP011374.1,CP011375.1	31	10079	3
Lactobacillus plantarum	JBE245	ASM159609v1	CP014780.1	22	10078	3
Legionella sainthelensi	LA01-117	ASM284836v1	CP025491.1,CP025493.1,CP025492.1	73	10068	3
Citrobacter freundii	18-1	ASM221538v1	CP022273.1,CP022274.1,CP022275.1,CP022276.1,CP022277.1	246	10066	3
Rhodococcus sp. WMMA185	WMMA185	ASM176739v1	CP017014.1	15	10065	3
Xanthomonas axonopodis pv. citrumelo F1	F1	ASM22591v1	CP002914.1	38	10065	3
Pseudomonas sp. URMO17WK12:I11	NA	YEL.embl.gz	LN865164.1	44	10057	3
Aminobacter aminovorans	KCTC 2477	ASM160501v1	CP015005.1,CP015006.1,CP015007.1,CP015008.1,CP015009.1	86	10052	3
Vibrio parahaemolyticus	FDAARGOS_191	ASM207377v1	CP020427.1,CP020428.1	85	10051	3
Vibrio parahaemolyticus RIMD 2210633	O3:K6	ASM19609v1	BA000031.2,BA000032.2	83	10047	3
Francisella tularensis subsp. tularensis str. SCHU S4 substr. NR-28534	SCHU S4	ASM97878v2	CP010446.2,CP010447.1	122	10039	3
Xanthomonas axonopodis pv. citri str. 306	306	ASM716v1	AE008923.1,AE008924.1,AE008925.1	116	10038	3
Xanthomonas citri subsp. citri	NT17	ASM96119v1	CP008995.1,CP008993.1,CP008994.1	116	10038	3
Xanthomonas citri subsp. citri	FB19	ASM96137v1	CP009022.1,CP009020.1,CP009021.1	105	10038	3
Xanthomonas citri subsp. citri	MN11	ASM96123v1	CP009001.1,CP008999.1,CP009000.1	107	10038	3
Xanthomonas citri subsp. citri	MN10	ASM96125v1	CP009004.1,CP009002.1,CP009003.1	103	10038	3
Xanthomonas citri subsp. citri	LL074-4	ASM192204v1	CP018847.1,CP018848.1,CP018849.1	110	10038	3
Xanthomonas citri subsp. citri	LH201	ASM192210v1	CP018858.1,CP018859.1,CP018860.1	93	10038	3
Xanthomonas citri subsp. citri	gd3	ASM96133v1	CP009016.1,CP009014.1,CP009015.1	103	10038	3
Xanthomonas citri subsp. citri	mf20	ASM96127v1	CP009007.1,CP009005.1,CP009006.1	105	10038	3
Xanthomonas citri subsp. citri	jx-6	ASM102828v3	CP011827.2,CP013665.1,CP013664.1	123	10038	3
Xanthomonas citri subsp. citri	BL18	ASM96139v1	CP009025.1,CP009023.1,CP009024.1	105	10038	3
Xanthomonas citri subsp. citri	UI7	ASM96115v1	CP008989.1,CP008987.1,CP008988.1	107	10038	3
Xanthomonas citri subsp. citri	gd2	ASM96135v1	CP009019.1,CP009017.1,CP009018.1	103	10038	3
Xanthomonas citri subsp. citri	MN12	ASM96121v1	CP008998.1,CP008996.1,CP008997.1	103	10038	3
Xanthomonas citri subsp. citri	5208	ASM96141v1	CP009028.1,CP009026.1,CP009027.1	116	10038	3
Xanthomonas citri subsp. citri A306	A306	ASM81688v1	CP006857.1,CP006855.1,CP006856.1	116	10038	3
Xanthomonas citri subsp. citri UI6	UI6	ASM96117v1	CP008992.1,CP008990.1,CP008991.1	107	10038	3
Corynebacterium glutamicum	WM001	ASM222013v1	CP022394.1	58	10033	3
Xanthomonas citri subsp. citri	jx5	ASM96129v1	CP009010.1,CP009008.1,CP009009.1	102	10030	3
Xanthomonas citri subsp. citri	jx4	ASM96131v1	CP009013.1,CP009011.1,CP009012.1	102	10030	3
Streptomyces rubrolavendulae	MJM4426	ASM175078v1	CP017316.1	12	10028	3
Kozakia baliensis	NBRC 16680	ASM178735v1	CP014681.1,CP014682.1,CP014683.1,CP014684.1,CP014685.1,CP014686.1	93	10027	3
Weissella koreensis KACC 15510	KACC 15510	ASM21980v1	CP002899.1,CP002900.1	13	10027	3
Bacillus safensis	U14-5	ASM193866v1	CP015607.1,CP015608.1,CP015609.1	136	10026	3
Burkholderia pseudomallei	2013746777	ASM211120v1	CP018398.1,CP018399.1	114	10022	3
Enterobacter cloacae	AA4	ASM202568v1	CP018785.1	30	10017	3
Klebsiella oxytoca	KONIH4	ASM290639v1	CP026269.1,CP026271.1,CP026273.1,CP026274.1,CP026272.1,CP026270.1	201	10010	3
Klebsiella sp. 2N3	2N3	ASM285027v1	CP025541.1	31	10010	3
Klebsiella pneumoniae	AR_0125	ASM219750v1	CP021859.1,CP021856.1,CP021857.1,CP021858.1,CP021860.1,CP021861.1	180	10008	3
Citrobacter freundii complex sp. CFNIH9	CFNIH9	ASM290330v1	CP026238.1,CP026240.1,CP026241.1,CP026242.1,CP026239.1	235	10006	3
Klebsiella pneumoniae	CAV1596	ASM102223v1	CP011647.1,CP011643.1,CP011644.1,CP011645.1,CP011646.1	99	10006	3
Klebsiella pneumoniae	CAV1042	ASM190851v1	CP018671.1,CP018670.1,CP018665.1,CP018666.1,CP018667.1,CP018668.1,CP018669.1	82	10006	3
Bacillus thuringiensis	SCG04-02	ASM217375v1	CP017577.1,CP017575.1,CP017574.1,CP017576.1,CP017573.1	40	10002	3
Pectobacterium carotovorum subsp. brasiliense	BC1	ASM193263v1	CP009769.1	50	10002	3
Gibbsiella quercinecans	FRB97	ASM229142v1	CP014136.1	60	9998	3
Lactobacillus plantarum	HFC8	ASM130264v1	CP012650.1,CP012657.1,CP012655.1,CP012651.1,CP012652.1,CP012659.1,CP012660.1,CP012653.1,CP012656.1,CP012658.1,CP012654.1	595	9998	3
Pragia fontium	24613	ASM102698v1	CP010423.1	50	9998	3
Vibrio campbellii	LMB29	ASM196932v1	CP019293.1,CP019294.1,CP019296.1,CP019295.1,CP019298.1,CP019297.1	84	9996	3
Escherichia coli	Ecol_743	ASM161832v1	CP015069.1,CP015070.1,CP015072.1,CP015073.1,CP015071.1	144	9991	3
Acinetobacter baumannii	XH386	ASM102696v1	CP010779.1,CP010780.1	88	9989	3
Salmonella enterica	FDAARGOS_312	ASM220896v1	CP022062.1,CP022060.1,CP022061.1,CP022063.1,CP022064.1,CP022065.1	92	9986	3
Ketogulonicigenium robustum	SPU_B003	ASM211744v1	CP019937.1,CP019938.1,CP019939.1,CP019940.1,CP019941.1,CP019942.1	11	9950	3
Nocardia terpenica	NC_YFY_NT001	ASM256862v1	CP023778.1,CP023779.1	57	9942	3
Escherichia coli	MNCRE44	ASM93156v1	CP010876.1,CP010877.1,CP010878.1,CP010879.1,CP010880.1,CP010881.1,CP010882.1	137	9938	3
Salmonella enterica subsp. enterica serovar Bergen str. ST350	ST350	ASM197532v1	CP019405.1	31	9938	3
Legionella pneumophila	NCTC11985	48450_B02	LT906452.1	63	9935	3
Sphingobium baderi	DE-13	ASM145611v1	CP013264.1,CP013265.1,CP013266.1,CP013267.1,CP013268.1,CP013269.1,CP013270.1,CP013271.1,CP013272.1	141	9934	3
Burkholderia pseudomallei	2011756295	ASM211096v1	CP018391.1,CP018392.1	123	9925	3
Burkholderia pseudomallei	3000015237	ASM211104v1	CP018410.1,CP018411.1	141	9920	3
Escherichia coli	144	ASM231059v1	CP023364.1,CP023363.1,CP023365.1	106	9920	3
Acidovorax sp. P4	P4	ASM215712v1	CP021366.1,CP021367.1,CP021368.1,CP021369.1,CP021370.1	70	9918	3
Xanthomonas citri pv. phaseoli var. fuscans	CFBP6989	ASM275929v1	CP020981.1,CP020982.1	44	9914	3
Burkholderia pseudomallei	2013833057	ASM211126v1	CP018408.1,CP018409.1	115	9907	3
Burkholderia pseudomallei	2013833055	ASM211102v1	CP018406.1,CP018407.1	115	9907	3
Legionella pneumophila	OLDA	ASM167707v2	CP016030.2,CP016031.1	44	9904	3
Streptococcus suis	AH681	ASM281252v1	CP025043.1	81	9899	3
Rhizobium sp. NT-26	NT-26	ASM96742v1	FO082820.1,FO082821.1,FO082822.1	49	9895	3
Burkholderia pseudomallei MSHR62	MSHR62	ASM77039v1	CP009235.1,CP009234.1	87	9891	3
Burkholderia pseudomallei NAU20B-16	NAU20B-16	ASM51191v1	CP004003.1,CP004004.1	105	9889	3
Bacillus sonorensis	SRCM101395	ASM220201v1	CP021920.1	40	9875	3
Burkholderia pseudomallei	2002721123	ASM211132v1	CP018369.1,CP018370.1	148	9875	3
Burkholderia pseudomallei	MSHR1435	ASM284364v1	CP025264.1,CP025265.1	76	9874	3
Escherichia albertii	2014C-4356	ASM274137v1	CP024282.1,CP024283.1,CP024284.1,CP024285.1,CP024286.1,CP024287.1,CP024288.1	243	9874	3
Klebsiella pneumoniae	CAV1392	ASM102203v1	CP011578.1,CP011577.1,CP011576.1,CP011575.1	122	9872	3
Octadecabacter arcticus 238	238	ASM15573v2	CP003742.1,CP003743.1,CP003744.1	1500	9868	3
Burkholderia pseudomallei	MSHR1655	ASM75616v1	CP008780.1,CP008779.1	65	9866	3
Burkholderia pseudomallei	2011756189	ASM211116v1	CP018389.1,CP018390.1	121	9862	3
Candidatus Arthromitus sp. SFB-mouse-Japan	NA	ASM27020v1	AP012202.1	23	9856	3
Escherichia coli	S30	ASM190136v1	CP010231.1,CP010232.1,CP010233.1,CP010234.1	213	9856	3
Burkholderia pseudomallei	3000047530	ASM211128v1	CP018414.1,CP018415.1	165	9855	3
Acinetobacter pittii	WCHAP005069	ASM290280v1	CP026089.1,CP026087.1,CP026088.1,CP026086.1	129	9843	3
Pseudomonas aeruginosa DHS01	DHS01	ASM49645v2	CP013993.1	45	9842	3
Candidatus Liberibacter asiaticus str. gxpsy	gxpsy	ASM34659v1	CP004005.1	25	9838	3
Streptomyces albireticuli	MDJK11	ASM219245v1	CP021744.1	35	9838	3
Burkholderia pseudomallei A79A	A79A	ASM77053v1	CP009165.1,CP009164.1	78	9837	3
Burkholderia pseudomallei B03	B03	ASM77045v1	CP009151.1,CP009150.1	78	9837	3
Burkholderia pseudomallei NAU35A-3	NAU35A-3	ASM76457v1	CP004377.1,CP004378.1	75	9834	3
Lactobacillus plantarum	LY-78	ASM171561v1	CP015308.1,CP016631.1	38	9833	3
Staphylococcus pseudintermedius	NA45	ASM168233v1	CP016072.1	57	9831	3
Mannheimia haemolytica M42548	M42548	ASM37664v1	CP005383.1	72	9830	3
Polaromonas sp. JS666	JS666	ASM1386v1	CP000316.1,CP000317.1,CP000318.1	54	9828	3
Burkholderia pseudomallei	MSHR668	ASM95930v1	CP009545.1,CP009546.1	67	9823	3
Burkholderia pseudomallei 668	668	ASM1590v1	CP000570.1,CP000571.1	67	9823	3
Burkholderia pseudomallei MSHR840	MSHR840	ASM95918v1	CP009474.1,CP009473.1	136	9823	3
Salinicoccus sp. BAB 3246	BAB3246	ASM221546v1	CP020916.1	7	9810	3
Brucella vulpis	F60	BVF60	LN997863.1,LN997864.1	181	9804	3
Lactobacillus plantarum	TMW 1.277	ASM211726v1	CP017363.1,CP017364.1,CP017369.1,CP017365.1,CP017366.1,CP017367.1,CP017368.1,CP017370.1,CP017371.1,CP017372.1,CP017373.1	148	9801	3
Bordetella pertussis	VA-09	ASM168650v1	CP015765.1	302	9798	3
Burkholderia pseudomallei NCTC 13178	NCTC 13178	ASM51189v1	CP004001.1,CP004002.1	96	9792	3
Mannheimia haemolytica	89010807N	ASM96363v1	CP011098.1	63	9778	3
Mannheimia haemolytica	89010807N lktA-	ASM96367v1	CP011099.1	63	9778	3
Lactobacillus plantarum	TMW 1.25	ASM211724v1	CP017354.1,CP017355.1,CP017356.1,CP017357.1,CP017358.1,CP017359.1,CP017360.1,CP017361.1,CP017362.1	144	9776	3
Enterobacter cloacae subsp. cloacae ATCC 13047	ATCC 13047	ASM2556v1	CP001918.1,CP001919.1,CP001920.1	187	9774	3
Pseudoalteromonas espejiana DSM 9414	ATCC 29659	ASM222152v1	CP011028.1,CP011029.1	49	9771	3
Burkholderia pseudomallei NCTC 13179	NCTC 13179	ASM49485v1	CP003976.1,CP003977.1	105	9768	3
Verminephrobacter eiseniae EF01-2	EF01-2	ASM1556v1	CP000542.1,CP000543.1	159	9768	3
Klebsiella pneumoniae	KP1766	ASM283346v1	CP025146.1,CP025147.1,CP025148.1	131	9756	3
Microvirga ossetica	V5/3M	ASM274101v1	CP016616.1,CP016617.1,CP016619.1,CP016618.1,CP016620.1,CP016621.1	1531	9756	3
Mycobacterium tuberculosis	Beijing-like/35049	ASM211675v1	CP017593.1	86	9754	3
Burkholderia pseudomallei	MSHR7929	ASM197506v1	CP017044.1,CP017045.1	70	9745	3
Acinetobacter baumannii	IOMTU 433	ASM82893v1	AP014649.1,AP014650.1	53	9743	3
Ralstonia solanacearum	KACC10709	ASM170852v1	CP016904.1,CP016905.1	348	9737	3
Ralstonia solanacearum	EP1	ASM189110v1	CP015115.1,CP015116.1	168	9737	3
Ralstonia solanacearum OE1-1	OE1-1	ASM187956v1	CP009764.1,CP009763.1	144	9737	3
Lactococcus lactis subsp. cremoris A76	A76	ASM23647v1	CP003132.1,CP003136.1,CP003135.1,CP003134.1,CP003133.1	439	9728	3
Escherichia coli	13E0725	ASM205560v1	CP020092.1	154	9725	3
Candidatus Thiodictyon syntrophicum	Cad16T	ASM281377v1	CP020370.1,CP020371.1,CP020372.1	431	9723	3
Salinivirga cyanobacteriivorans	L21-Spi-D4	ASM144360v1	CP013118.1	251	9718	3
Pseudomonas chlororaphis subsp. aurantiaca	JD37	ASM76119v1	CP009290.1	124	9708	3
Paenarthrobacter aurescens TC1	TC1	ASM1492v1	CP000474.1,CP000475.1,CP000476.1	77	9704	3
Listeria monocytogenes	R2-502	ASM43858v1	CP006594.1,CP006595.1	20	9702	3
Escherichia coli	C10	ASM190033v1	CP010132.1	62	9697	3
Piscirickettsia salmonis	AY6492A	ASM193259v1	CP013757.1,CP013758.1,CP013759.1,CP013760.1,CP013761.1	1498	9697	3
Enterobacter asburiae LF7a	LF7a	ASM22467v1	CP003026.1,CP003027.1,CP003028.1	35	9686	3
Legionella pneumophila	C11_O	ASM175312v1	CP015945.1	30	9681	3
Ralstonia solanacearum	SEPPX05	ASM216201v1	CP021448.1,CP021449.1	511	9680	3
Burkholderia pseudomallei	3000465972	ASM211130v1	CP018416.1,CP018417.1	118	9677	3
Escherichia coli	STEC299	ASM286384v1	CP022279.1,CP022280.1,CP022281.1	133	9677	3
Burkholderia pseudomallei	VB976100	ASM188519v1	CP018054.1,CP018055.1	112	9671	3
Yersinia enterocolitica	YE7	ASM170855v1	CP016935.1,CP016934.1,CP016936.1	158	9666	3
Desulfomicrobium orale DSM 12838	DSM 12838	ASM155362v1	CP014230.1	112	9661	3
Xanthomonas citri pv. phaseoli var. fuscans	CFBP6994R	ASM275917v1	CP020987.1,CP020988.1	42	9658	3
Burkholderia pseudomallei	2013746877	ASM211124v1	CP018402.1,CP018403.1	126	9657	3
Burkholderia pseudomallei	2013746878	ASM211100v1	CP018404.1,CP018405.1	127	9657	3
Caldicellulosiruptor lactoaceticus 6A	6A	ASM19343v3	CP003001.1	187	9648	3
Cronobacter dublinensis subsp. dublinensis LMG 23823	LMG 23823	ASM127723v1	CP012266.1,CP012267.1	41	9644	3
Thiobacimonas profunda	JLT2016	ASM196938v1	CP014796.1,CP014797.1,CP014798.1,CP014799.1,CP014800.1,CP014801.1,CP014802.1,CP014803.1,CP014804.1	143	9640	3
Campylobacter pinnipediorum subsp. pinnipediorum	RM17262	ASM202196v1	CP012548.1	27	9630	3
Burkholderia pseudomallei 7894	7894	ASM95926v1	CP009535.1,CP009536.1	100	9629	3
Burkholderia gladioli BSR3	BSR3	ASM19474v1	CP002599.1,CP002600.1,CP002601.1,CP002602.1,CP002603.1,CP002604.1	240	9621	3
Xanthomonas gardneri	ICMP7383	ASM190877v1	CP018731.1,CP018732.1,CP018733.1,CP018734.1	214	9621	3
Xanthomonas campestris	17	ASM97274v1	CP011256.1	41	9620	3
Burkholderia pseudomallei	2002721184	ASM211108v1	CP018373.1,CP018374.1	100	9618	3
Burkholderia pseudomallei	2008724758	ASM211136v1	CP018382.1,CP018383.1	125	9612	3
Escherichia coli	MRY15-117	ASM235789v1	AP017617.1,AP017618.1,AP017619.1	120	9612	3
[truncated: 7,332 more rows]
